# Supplementary material for: Decentralizing oxygen availability and use at primary care level for children under-five with severe pneumonia, at 12 Health Centers in Ethiopia: a pre-post non-experimental study
Source: BMC Health Serv Res. 2022 May 19;22:676. doi: 10.1186/s12913-022-08003-4 (PMC9121544; doi:10.1186/s12913-022-08003-4)
Supplement: Supplementary file 7 — Additional file 7. HC_MRR_TOOL_Baseline. [file 12913_2022_8003_MOESM7_ESM.xlsx]

## Sheet: HC_MRR_TOOL_v1_(field)_WIDE
S.No	SubmissionDate	username	pxid1	pxid2_a	pxid2_b	pxid3_a	pxid3_b	pxid5	pxid6	pxid7	px1	px2	px3	px4	px4_other	px5	px6(age of the child)	PX(Respiratory Rate)	px7	px8	px9	px10	px11	px12	px12_A	px12_B	px12_C	px12_D	px12_E	px12_F	px12_G	px12_H	px12_I	px12_J	px12_K	px12_L	px12_M	px12_N	px12_O	px12_X	px12_Y	px12_other	px13	px14	px14.1	px15	px16	px17	px18
1	2019-02-12 15:26:07	ttumbule@clintonhealthaccess.org	2019-02-01	Tegegn Chote		Kella health center		3	302	3002	12205/11	30/2/11	9	10		1	4	2	2	7.8	9	36	48	A B	1	1	0	0	0	0	0	0	0	0	0	0	0	0	0	0	0		2			2
2	2019-02-12 15:50:38	ttumbule@clintonhealthaccess.org	2019-02-01	Tegegn Chote		Kella wondogenet HC		3	302	3002	10232/11	14/4/11	9	7		1	2	2	1	9.5	9	36.8	44	A K	1	0	0	0	0	0	0	0	0	0	1	0	0	0	0	0	0		2			2
3	2019-02-12 15:59:01	ttumbule@clintonhealthaccess.org	2019-02-01	Tegegn Chote		Kella Wondogenet HC		3	302	3002	03384/11	2011-02-04	9	7		1	2	2	1	3	9	38.9	54	A G	1	0	0	0	0	0	1	0	0	0	0	0	0	0	0	0	0		2			2
4	2019-02-12 16:13:31	ttumbule@clintonhealthaccess.org	2019-02-01	Tegegn Chote		Wondogenet HC		3	302	3002	02095/11	26/2/11	9	10		4	46	3	1	16	9	36.6	40	A B	1	1	0	0	0	0	0	0	0	0	0	0	0	0	0	0	0		2			2
5	2019-02-12 16:27:02	ttumbule@clintonhealthaccess.org	2019-02-01	Tegegn Chote		CHAI		3	302	3002	02082/11	26/2/11	9	10		4	36	3	1	13	9	36.8	58	A B	1	1	0	0	0	0	0	0	0	0	0	0	0	0	0	0	0		2			2
6	2019-02-12 16:48:16	ttumbule@clintonhealthaccess.org	2019-02-01	Tegegn Chote		CHAI		3	302	3002	02072/11	23/2/11	9	10		2	12	3	1	9.3	9	36.9	44	D G M	0	0	0	1	0	0	1	0	0	0	0	0	1	0	0	0	0		2			2
7	2019-02-12 16:56:30	ttumbule@clintonhealthaccess.org	2019-02-01	Tegegn Chote		CHAI		3	302	3002	01985/11	22/2/11	9	10		1	7	2	1	9	9	36	62	A B N	1	1	0	0	0	0	0	0	0	0	0	0	0	1	0	0	0		2			2
8	2019-02-13 11:33:32	ttumbule@clintonhealthaccess.org	2019-02-01	Tegegn Chote		CHAI		3	302	3002	01984/11	22/2/11	9	10		1	8	2	2	10	9	36	60	A B N	1	1	0	0	0	0	0	0	0	0	0	0	0	1	0	0	0		2			2
9	2019-02-13 11:47:02	ttumbule@clintonhealthaccess.org	2019-02-01	Tegegn Chote		CHAI		3	302	3002	01968/11	22/2/11	9	10		1	8	2	1	7	9	36	56	A B	1	1	0	0	0	0	0	0	0	0	0	0	0	0	0	0	0		2			2
10	2019-02-13 11:52:10	ttumbule@clintonhealthaccess.org	2019-02-01	Tegegn Chote		CHAI		3	302	3002	13655/11	22/2/11	4	10		3	29	3	1	10	9	38.7	54	A B G	1	1	0	0	0	0	1	0	0	0	0	0	0	0	0	0	0		2			2
11	2019-02-13 11:57:02	ttumbule@clintonhealthaccess.org	2019-02-01	Tegegn Chote		CHAI		3	302	3002	01892/11	20/1/11	9	10		4	36	3	2	10.7	9	36.6	999	A G	1	0	0	0	0	0	1	0	0	0	0	0	0	0	0	0	0		2			2
12	2019-02-13 12:01:56	ttumbule@clintonhealthaccess.org	2019-02-01	Tegegn Chote		CHAI		3	302	3002	80914/11	16/2/11	9	10		4	45	3	1	17	9	39.8	38	A G	1	0	0	0	0	0	1	0	0	0	0	0	0	0	0	0	0		2			2
13	2019-02-13 12:06:15	ttumbule@clintonhealthaccess.org	2019-02-01	Tegegn Chote		CHAI		3	302	3002	011708/11	15/2/11	9	10		5	48	3	1	12	9	36.6	40	A C K	1	0	1	0	0	0	0	0	0	0	1	0	0	0	0	0	0		2			2
14	2019-02-13 12:22:56	ttumbule@clintonhealthaccess.org	2019-02-01	Tegegn Chote		CHAI		3	302	3002	10639/08	15/2/11	9	10		4	29	3	1	11	9	38	42	A B	1	1	0	0	0	0	0	0	0	0	0	0	0	0	0	0	0		2			2
15	2019-02-13 12:28:04	ttumbule@clintonhealthaccess.org	2019-02-01	Tegegn Chote		CHAI		3	302	3002	01719/11	14/2/11	9	10		2	20	3	1	12	9	36.6	42	A	1	0	0	0	0	0	0	0	0	0	0	0	0	0	0	0	0		2			2
16	2019-02-13 12:32:00	ttumbule@clintonhealthaccess.org	2019-02-01	Tegegn Chote		CHAI		3	302	3002	05493/11	14/2/11	9	10		1	8	2	1	8	9	36.6	60	A B	1	1	0	0	0	0	0	0	0	0	0	0	0	0	0	0	0		2			2
17	2019-02-13 14:16:49	ttumbule@clintonhealthaccess.org	2019-02-01	Tegegn Chote		CHAI		3	302	3002	05006/10	13/2/11	9	10		2	24	3	1	10	9	36	58	A B	1	1	0	0	0	0	0	0	0	0	0	0	0	0	0	0	0		2			2
18	2019-02-13 14:20:04	ttumbule@clintonhealthaccess.org	2019-02-01	Tegegn Chote		CHAI		3	302	3002	00918/11	13/2/11	9	10		1	7	2	1	8	9	36	58	A B	1	1	0	0	0	0	0	0	0	0	0	0	0	0	0	0	0		2			2
19	2019-02-13 14:23:35	ttumbule@clintonhealthaccess.org	2019-02-01	Tegegn Chote		CHAI		3	302	3002	01614/11	2011-12-02	9	10		1	7	2	1	8	9	36	60	A B	1	1	0	0	0	0	0	0	0	0	0	0	0	0	0	0	0		2			2
20	2019-02-13 14:28:35	ttumbule@clintonhealthaccess.org	2019-02-01	Tegegn Chote		CHAI		3	302	3002	01438/10	2011-07-02	9	10		3	24	3	1	11.8	9	36.6	46	A F	1	0	0	0	0	1	0	0	0	0	0	0	0	0	0	0	0		2			2
21	2019-02-13 14:34:10	ttumbule@clintonhealthaccess.org	2019-02-01	Tegegn Chote		CHAI		3	302	3002	01336/11	2011-05-02	9	10		1	10	2	1	7	9	36.6	999	A	1	0	0	0	0	0	0	0	0	0	0	0	0	0	0	0	0		2			2
22	2019-02-13 14:48:42	ttumbule@clintonhealthaccess.org	2019-02-01	Tegegn Chote		CHAI		3	302	3002	01384/11	2011-02-02	9	7		2	12	3	2	9.6	9	36.9	40	A B H K M	1	1	0	0	0	0	0	1	0	0	1	0	1	0	0	0	0		2			2
23	2019-02-14 09:25:41	ttumbule@clintonhealthaccess.org	2019-01-29	Tegegn Chote		CHAI		3	301	3001	12690/09	2011-07-03	9	10		1	6	2	1	8	9	9	38	A G	1	0	0	0	0	0	1	0	0	0	0	0	0	0	0	0	0		2			2
24	2019-02-14 09:31:30	ttumbule@clintonhealthaccess.org	2019-01-29	Tegegn Chote		CHAI		3	301	3001	20590/11	2011-10-03	9	10		2	24	3	1	12	9	9	56	A B G	1	1	0	0	0	0	1	0	0	0	0	0	0	0	0	0	0		2			2
25	2019-02-14 09:37:14	ttumbule@clintonhealthaccess.org	2019-01-29	Tegegn Chote		CHAI		3	301	3001	13874/09	15/3/11	9	10		3	24	3	1	12	9	9	49	A B G	1	1	0	0	0	0	1	0	0	0	0	0	0	0	0	0	0		2			2
26	2019-02-14 09:47:28	ttumbule@clintonhealthaccess.org	2019-01-29	Tegegn Chote		CHAI		3	301	3001	05250/10	24/3/11	9	10		3	24	3	1	99	9	9	88	A B K	1	1	0	0	0	0	0	0	0	0	1	0	0	0	0	0	0		2			2
27	2019-02-14 09:51:09	ttumbule@clintonhealthaccess.org	2019-01-29	Tegegn Chote		CHAI		3	301	3001	02968/11	27/3/11	9	10		1	11	2	1	7.5	9	9	50	A C G	1	0	1	0	0	0	1	0	0	0	0	0	0	0	0	0	0		2			2
28	2019-02-14 09:55:09	ttumbule@clintonhealthaccess.org	2019-01-29	Tegegn Chote		CHAI		3	301	3001	27714/11	2011-03-04	9	10		1	4	2	2	7	9	9	52	A B G	1	1	0	0	0	0	1	0	0	0	0	0	0	0	0	0	0		2			2
29	2019-02-14 09:59:12	ttumbule@clintonhealthaccess.org	2019-01-29	Tegegn Chote		CHAI		3	301	3001	00825/11	2011-11-04	9	10		2	13	3	2	9	9	9	38	A	1	0	0	0	0	0	0	0	0	0	0	0	0	0	0	0	0		2			2
30	2019-02-14 10:04:42	ttumbule@clintonhealthaccess.org	2019-01-29	Tegegn Chote		CHAI		3	301	3001	28253/11	16/4/11	9	10		1	3	2	1	99	9	9	62	A B	1	1	0	0	0	0	0	0	0	0	0	0	0	0	0	0	0		2			2
31	2019-02-14 11:41:43	ttumbule@clintonhealthaccess.org	2019-01-29	Tegegn Chote		CHAI		3	301	3001	22416/10	14/4/11	9	10		2	12	3	2	99	9	9	56	A G	1	0	0	0	0	0	1	0	0	0	0	0	0	0	0	0	0		2			2
32	2019-02-14 11:59:57	ttumbule@clintonhealthaccess.org	2019-01-29	Tegegn Chote		CHAI		3	301	3001	22758/10	22/3/11	9	7		2	5	2	1	99	9	9	999	A B G K	1	1	0	0	0	0	1	0	0	0	1	0	0	0	0	0	0		2			2
33	2019-02-14 12:08:00	ttumbule@clintonhealthaccess.org	2019-01-29	Tegegn Chote		CHAI		3	301	3001	20890/10	2011-10-03	9	10		2	12	3	1	99	9	9	999	A B G	1	1	0	0	0	0	1	0	0	0	0	0	0	0	0	0	0		2			2
34	2019-02-14 12:12:42	ttumbule@clintonhealthaccess.org	2019-01-29	Tegegn Chote		CHAI		3	301	3001	05578/11	2011-02-02	9	10		1	2	2	2	99	9		999	A	1	0	0	0	0	0	0	0	0	0	0	0	0	0	0	0	0		2			2
35	2019-02-14 12:17:38	ttumbule@clintonhealthaccess.org	2019-01-29	Tegegn Chote		CHAI		3	301	3001	06171/11	2011-11-03	9	10		3	22	3	1	99	9	9	999	Y	0	0	0	0	0	0	0	0	0	0	0	0	0	0	0	0	1		2			2
36	2019-02-14 12:20:31	ttumbule@clintonhealthaccess.org	2019-01-29	Tegegn Chote		CHAI		3	301	3001	09483/11	24/4/11	9	10		3	24	3	2	99	9	37	62	A D N	1	0	0	1	0	0	0	0	0	0	0	0	0	1	0	0	0		2			2
37	2019-02-14 12:29:46	ttumbule@clintonhealthaccess.org	2019-01-29	Tegegn Chote		CHAI		3	301	3001	09113/11	20/4/11	9	7		1	9	2	2	99	9	9	999	A D	1	0	0	1	0	0	0	0	0	0	0	0	0	0	0	0	0		2			2
38	2019-02-14 12:34:04	ttumbule@clintonhealthaccess.org	2019-01-29	Tegegn Chote		CHAI		3	301	3001	01747/11	2011-05-02	9	10		1	7	2	1	99	9	9	999	A B G	1	1	0	0	0	0	1	0	0	0	0	0	0	0	0	0	0		2			2
39	2019-02-14 14:31:08	ttumbule@clintonhealthaccess.org	2019-01-29	Tegegn Chote		CHAI		3	301	3001	28111/10	25/4/11	9	10		2	28	3	1	99	9	9	999	A G	1	0	0	0	0	0	1	0	0	0	0	0	0	0	0	0	0		2			2
40	2019-02-14 14:34:30	ttumbule@clintonhealthaccess.org	2019-01-29	Tegegn Chote		CHAI		3	301	3001	27147/10	13/3/11	9	10		1	8	2	2	99	9	9	999	A G	1	0	0	0	0	0	1	0	0	0	0	0	0	0	0	0	0		2			2
41	2019-02-14 14:39:30	ttumbule@clintonhealthaccess.org	2019-01-29	Tegegn Chote		CHAI		3	301	3001	02741/11	2011-12-02	9	10		1	12	3	1	99	9	9	999	Y	0	0	0	0	0	0	0	0	0	0	0	0	0	0	0	0	1		2			2
42	2019-02-14 14:49:31	ttumbule@clintonhealthaccess.org	2019-01-29	Tegegn Chote		CHAI		3	301	3001	04320/11	18/2/11	9	10		1	7	2	1	99	9	9	999	A	1	0	0	0	0	0	0	0	0	0	0	0	0	0	0	0	0		2			2
43	2019-02-14 14:59:43	ttumbule@clintonhealthaccess.org	2019-01-29	Tegegn Chote		CHAI		3	301	3001	05578/11	2011-03-03	9	10		1	2	2	1	99	9	9	60	A C	1	0	1	0	0	0	0	0	0	0	0	0	0	0	0	0	0		2			2
44	2019-02-14 15:05:11	ttumbule@clintonhealthaccess.org	2019-01-29	Tegegn Chote		CHAI		3	301	3001	01747/11	2011-05-03	9	10		1	7	2	1	8	9	9	60	A B G	1	1	0	0	0	0	1	0	0	0	0	0	0	0	0	0	0		2			2
45	2019-02-14 15:09:41	ttumbule@clintonhealthaccess.org	2019-01-29	Tegegn Chote		CHAI		3	301	3001	27714/10	2011-03-04	9	10		1	2	2	2	99	9	9	52	A B G	1	1	0	0	0	0	1	0	0	0	0	0	0	0	0	0	0		2			2
46	2019-02-14 15:13:52	ttumbule@clintonhealthaccess.org	2019-01-29	Tegegn Chote		CHAI		3	301	3001	260211/10	2010-03-02	9	7		1	3	2	1	99	9		999	A B G H K N	1	1	0	0	0	0	1	1	0	0	1	0	0	1	0	0	0		2			2
47	2019-02-14 15:17:12	ttumbule@clintonhealthaccess.org	2019-01-29	Tegegn Chote		CHAI		3	301	3001	00104/11	2011-01-04	9	10		1	3	2	1	99	9	9	999	A B	1	1	0	0	0	0	0	0	0	0	0	0	0	0	0	0	0		2			2
48	2019-02-14 15:25:19	ttumbule@clintonhealthaccess.org	2019-01-29	Tegegn Chote		CHAI		3	301	3001	02968/11	24/3/11	9	10		1	2	2	1	99	9	9	999	A B	1	1	0	0	0	0	0	0	0	0	0	0	0	0	0	0	0		2			2
49	2019-02-14 15:34:11	ttumbule@clintonhealthaccess.org	2019-01-29	Tegegn Chote		CHAI		3	301	3001	02412/11	2011-06-02	9	10		1	4	2	1	99	9	9	999	A B D G	1	1	0	1	0	0	1	0	0	0	0	0	0	0	0	0	0		2			2
50	2019-02-14 15:37:29	ttumbule@clintonhealthaccess.org	2019-03-01	Tegegn Chote		CHAI		3	301	3001	25667/10	2011-06-02	9	10		1	2	2	1	99	9	9	999	A G	1	0	0	0	0	0	1	0	0	0	0	0	0	0	0	0	0		2			2
51	2019-02-14 16:04:44	ttumbule@clintonhealthaccess.org	2019-01-29	Tegegn Chote		CHAI		3	301	3001	1119/10	22/2/11	9	10		2	13	3	2	99	9	9	999	A	1	0	0	0	0	0	0	0	0	0	0	0	0	0	0	0	0		2			2
52	2019-02-14 20:40:14	ttumbule@clintonhealthaccess.org	2019-01-29	Tegegn Chote		CHAI		3	301	3001	11856/10	28/2/11	9	10		1	2	2	2	99	9	9	999	A B	1	1	0	0	0	0	0	0	0	0	0	0	0	0	0	0	0		2			2
53	2019-02-14 20:43:30	ttumbule@clintonhealthaccess.org	2019-01-29	Tegegn Chote		CHAI		3	301	3001	09278/10	9	9	10		1	4	2	2	99	9	9	999	Y	0	0	0	0	0	0	0	0	0	0	0	0	0	0	0	0	1		2			2
54	2019-02-14 20:47:04	ttumbule@clintonhealthaccess.org	2019-01-29	Tegegn Chote		CHAI		3	301	3001	05250/10	26/3/11	9	10		3	22	3	2	99	9	9	999	A	1	0	0	0	0	0	0	0	0	0	0	0	0	0	0	0	0		2			2
55	2019-02-14 20:50:13	ttumbule@clintonhealthaccess.org	2019-01-29	Tegegn Chote		CHAI		3	301	3001	11632/10	24/4/11	9	10		1	7	2	2	99	9	9	999	A G	1	0	0	0	0	0	1	0	0	0	0	0	0	0	0	0	0		2			2
56	2019-02-14 20:54:12	ttumbule@clintonhealthaccess.org	2019-01-29	Tegegn Chote		CHAI		3	301	3001	13895/10	2011-01-02	9	10		1	6	2	1	99	9	9	999	A K	1	0	0	0	0	0	0	0	0	0	1	0	0	0	0	0	0		2			2
57	2019-02-14 20:57:36	ttumbule@clintonhealthaccess.org	2019-01-29	Tegegn Chote		CHAI		3	301	3001	05577/11	2011-03-03	9	10		1	2	2	2	99	9	9	999	A	1	0	0	0	0	0	0	0	0	0	0	0	0	0	0	0	0		2			2
58	2019-02-14 21:01:20	ttumbule@clintonhealthaccess.org	2019-01-29	Tegegn Chote		CHAI		3	301	3001	04479/11	22/4/11	9	10		1	2	2	2	99	9	9	999	A	1	0	0	0	0	0	0	0	0	0	0	0	0	0	0	0	0		2			2
59	2019-02-14 21:04:25	ttumbule@clintonhealthaccess.org	2019-01-29	Tegegn Chote		CHAI		3	301	3001	07216/11	24/3/11	9	10		1	6	2	1	99	9	9	999	Y	0	0	0	0	0	0	0	0	0	0	0	0	0	0	0	0	1		2			2
60	2019-02-14 21:09:02	ttumbule@clintonhealthaccess.org	2019-01-29	Tegegn Chote		CHAI		3	301	3001	07831/11	2011-04-04	9	7		4	36	3	2	99	9	9	999	A G K	1	0	0	0	0	0	1	0	0	0	1	0	0	0	0	0	0		2			2
61	2019-02-15 15:16:27	ttumbule@clintonhealthaccess.org	2019-01-30	Tegegn Chote		CHAI		3	302	3003	9	2011-02-02	9	10		2	16	3	2		9	37.5	48	A B G	1	1	0	0	0	0	1	0	0	0	0	0	0	0	0	0	0		2			2
62	2019-02-15 15:20:33	ttumbule@clintonhealthaccess.org	2019-01-30	Tegegn Chote		CHAI		3	302	3003	022725/11	20/2/11	9	7		1	2	2	1	5	9	33.6	56	A D E	1	0	0	1	1	0	0	0	0	0	0	0	0	0	0	0	0		2			2
63	2019-02-15 15:39:19	ttumbule@clintonhealthaccess.org	2019-01-30	Tegegn chote		CHAI		3	302	3003	02768/11	20/2/11	9	7		1	2	2	1	55	7	36.4	78	A B	1	1	0	0	0	0	0	0	0	0	0	0	0	0	0	0	0		2			2
64	2019-02-15 15:42:32	ttumbule@clintonhealthaccess.org	2019-01-30	Tegegn Chote		CHAI		3	302	3003	15974/10	26/4/11	9	10		3	25	3	2	14	98	36.5	40	A B	1	1	0	0	0	0	0	0	0	0	0	0	0	0	0	0	0		2			2
65	2019-02-15 15:46:44	ttumbule@clintonhealthaccess.org	2019-01-30	Tegegn Chote		CHAI		3	302	3003	06598/11	26/4/11	9	10		3	24	3	1	24	15	35.5	48	A B D G	1	1	0	1	0	0	1	0	0	0	0	0	0	0	0	0	0		2			2
66	2019-02-15 15:55:42	ttumbule@clintonhealthaccess.org	2019-01-30	Tegegn Chote		CHAI		3	302	3003	06592/11	26/4/11	9	10		1	4	2	1	7.7	55	25.9	58	A C G	1	0	1	0	0	0	1	0	0	0	0	0	0	0	0	0	0		2			2
67	2019-02-15 16:22:17	ttumbule@clintonhealthaccess.org	2019-01-30	Tegegn Chote		CHAI		3	302	3003	12157/11	24/4/11	9	10		2	18	3	2	10	67	34.5	42	A B	1	1	0	0	0	0	0	0	0	0	0	0	0	0	0	0	0		2			2
68	2019-02-15 16:47:44	ttumbule@clintonhealthaccess.org	2019-01-30	Tegegn Chote		CHAI		3	302	3003	06491/11	24/4/11	9	10		1	3	2	1	8.5	60	36.4	54	A B G	1	1	0	0	0	0	1	0	0	0	0	0	0	0	0	0	0		2			2
69	2019-02-15 16:50:59	ttumbule@clintonhealthaccess.org	2019-01-30	Tegegn Chote		CHAI		3	302	3003	06481/11	24/4/11	9	10		1	6	2	2	8	54	35.4	52	A B D	1	1	0	1	0	0	0	0	0	0	0	0	0	0	0	0	0		2			2
70	2019-02-15 16:56:38	ttumbule@clintonhealthaccess.org	2019-01-30	Tegegn Chote		CHAI		3	302	3003	06428/11	23/4/11	9	10		1	8	2	1	7.8	52	35.8	53	A B	1	1	0	0	0	0	0	0	0	0	0	0	0	0	0	0	0		2			2
71	2019-02-16 10:00:14	rgebeyehu@clintonhealthaccess.org	2019-01-31	Remrim Gebeyheu		CHAI		1	101	1001	133276	9	9	7		1	2	2	2	99	9	9	56	A K	1	0	0	0	0	0	0	0	0	0	1	0	0	0	0	0	0		2			2
72	2019-02-16 10:04:04	rgebeyehu@clintonhealthaccess.org	2019-01-31	Remrim Gebeyehu		CHAI		1	101	1001	124062	9	9	7		1	7	2	2	4.9	9	9	47	A K	1	0	0	0	0	0	0	0	0	0	1	0	0	0	0	0	0		2			2
73	2019-02-16 10:08:16	rgebeyehu@clintonhealthaccess.org	2019-01-31	Remrim Gebeyehu		CHAI		1	101	1001	107648	9	9	7		2	17	3	2	99	9	37.5	60	A B K	1	1	0	0	0	0	0	0	0	0	1	0	0	0	0	0	0		2			2
74	2019-02-16 10:13:40	rgebeyehu@clintonhealthaccess.org	2019-01-31	Remrim Gebeyehu		CHAI		1	101	1001	130289	23/1/11	23/1/11	1		1	0	1	1	3.5	9	9	999	Y	0	0	0	0	0	0	0	0	0	0	0	0	0	0	0	0	1		2			2
75	2019-02-16 10:18:27	rgebeyehu@clintonhealthaccess.org	2019-01-31	Remrim Gebeyehu		CHAI		1	101	1001	126422	2011-05-04	2011-05-04	7		1	9	2	1	8	9	38.4	56	A B K	1	1	0	0	0	0	0	0	0	0	1	0	0	0	0	0	0		2			2
76	2019-02-16 10:22:30	rgebeyehu@clintonhealthaccess.org	2019-01-31	remrim Gebeyehu		CHAI		1	101	1001	121456	23/1/11	23/1/11	7		1	6	2	9	99	9	9	999	Y	0	0	0	0	0	0	0	0	0	0	0	0	0	0	0	0	1		2			2
77	2019-02-16 10:26:27	rgebeyehu@clintonhealthaccess.org	2019-01-31	Remrim Gebeyehu		CHAI		1	101	1001	106064	2011-04-04	2011-04-04	7		1	11	2	2	99	9	37.3	49	A B K	1	1	0	0	0	0	0	0	0	0	1	0	0	0	0	0	0		2			2
78	2019-02-16 10:31:16	rgebeyehu@clintonhealthaccess.org	2019-01-31	Remrim Gebeyehu		CHAI		1	101	1001	131806	21/02/11	21/02/11	1		1	0	1	2	1.5	9	9	999	Y	0	0	0	0	0	0	0	0	0	0	0	0	0	0	0	0	1		2			2
79	2019-02-16 10:36:01	rgebeyehu@clintonhealthaccess.org	2019-01-31	Remrim Gebeyehu		CHAI		1	101	1001	131809	21/04/11	21/04/11	1		1	0	1	1	1.4	9	9	999	X	0	0	0	0	0	0	0	0	0	0	0	0	0	0	0	1	0	Very low birth wt	2			2
80	2019-02-16 10:45:06	rgebeyehu@clintonhealthaccess.org	2019-01-31	Remrim Gebeyehu		CHAI		1	101	1001	m-132310	2011-09-03	2011-09-03	2		1	0	1	1	3.5		9	999	C	0	0	1	0	0	0	0	0	0	0	0	0	0	0	0	0	0		2			2
81	2019-02-16 10:59:03	rgebeyehu@clintonhealthaccess.org	2019-01-31	Remrim Gebeyehu		CHAI		1	101	1001	9	24/2/11	24/2/11	1		1	0	1	1	3	9	9	999	C H	0	0	1	0	0	0	0	1	0	0	0	0	0	0	0	0	0		2			1	0	0	0
82	2019-02-16 11:02:51	rgebeyehu@clintonhealthaccess.org	2019-01-31	Remrim Gebeyehu		CHAI		1	101	1001	91079	13/02/11	13/02/11	7		3	29	3	1	99	9	36.7	52	A B K	1	1	0	0	0	0	0	0	0	0	1	0	0	0	0	0	0		2			2
83	2019-02-16 11:11:37	rgebeyehu@clintonhealthaccess.org	2019-01-31	Remrim Gebeyehu		CHAI		1	101	1001	9	18/04/11	18/04/11	1		1	0	1	1	3.4	9	9	999	C H J	0	0	1	0	0	0	0	1	0	1	0	0	0	0	0	0	0		2			2
84	2019-02-16 11:14:55	rgebeyehu@clintonhealthaccess.org	2019-01-31	Remrim Gebeyehu		CHAI		1	101	1001	117485	9	9	7		1	10	2	1	99	9	38.7	57	A B K	1	1	0	0	0	0	0	0	0	0	1	0	0	0	0	0	0		2			2
85	2019-02-16 11:19:21	rgebeyehu@clintonhealthaccess.org	2019-01-31	Remrim Gebeyehu		CHAI		1	101	1001	130155	21/01/11	21/01/11	1		1	0	1	2	3	9	9	999	C H J	0	0	1	0	0	0	0	1	0	1	0	0	0	0	0	0	0		2			2
86	2019-02-16 11:27:43	rgebeyehu@clintonhealthaccess.org	2019-01-29	Remrim Gebeyehu		CHAI		1	102	1002	84460	20/03/11	20/03/11	7		1	0	1	1	1.8	9	35.1	999	E	0	0	0	0	1	0	0	0	0	0	0	0	0	0	0	0	0		2			2
87	2019-02-16 11:33:04	rgebeyehu@clintonhealthaccess.org	2019-02-05	Remrim Gebeyehu		CHAI		1	102	1002	9	26/02/11	26/02/11	8		1	0	1	1	3.5	9	9	9	X	0	0	0	0	0	0	0	0	0	0	0	0	0	0	0	1	0	birth asphyxia	2			2
88	2019-02-16 11:38:09	rgebeyehu@clintonhealthaccess.org	2019-02-05	Remrim Gebeyehu		CHAI		1	102	1002	225748	21/1/11	21/01/11	2		1	10	2	2	8	76	9	52	A B	1	1	0	0	0	0	0	0	0	0	0	0	0	0	0	0	0		2			2
89	2019-02-16 11:42:25	rgebeyehu@clintonhealthaccess.org	2019-02-05	Remrim Gebeyehu		CHAI		1	102	1002	9	28/02/11	28/02/11	7		1	0	1	9	1.3	9	9	999	X	0	0	0	0	0	0	0	0	0	0	0	0	0	0	0	1	0	very low birth Wt	2			2
90	2019-02-16 11:55:49	rgebeyehu@clintonhealthaccess.org	2019-02-04	Remrim Gebeyehu		CHAI		1	103	1003	243555	2011-05-03	2011-05-03	7		1	0	1	2	2.4	9	9	999	Y	0	0	0	0	0	0	0	0	0	0	0	0	0	0	0	0	1		2			2
91	2019-02-16 12:00:42	rgebeyehu@clintonhealthaccess.org	2019-02-04	Remrim Gebeyehu		CHAI		1	103	1003	243487	2011-04-03	2011-04-03	7		1	0	1	2	2.8	9	9	999	X	0	0	0	0	0	0	0	0	0	0	0	0	0	0	0	1	0	diagnosed as birth asphyxia	2			2
92	2019-02-16 12:09:45	rgebeyehu@clintonhealthaccess.org	2019-02-04	Remrim Gebeyehu		CHAI		1	103	1003	243726	2011-08-03	2011-08-03	7		1	0	1	2	3.6	99	9	999	X Y	0	0	0	0	0	0	0	0	0	0	0	0	0	0	0	1	1	Birth Asphyxia	2			2
93	2019-02-16 12:14:26	rgebeyehu@clintonhealthaccess.org	2019-02-04	Remrim Gebeyehu		CHAI		1	103	1003	243719	2011-07-03	2011-07-03	7		1	0	1	1	2.4	9	9	999	X Y	0	0	0	0	0	0	0	0	0	0	0	0	0	0	0	1	1	birth asphyxia	2			2
94	2019-02-16 12:19:49	rgebeyehu@clintonhealthaccess.org	2019-02-04	Remrim Gebeyehu		CHAI		1	103	1003	243645	2011-07-03	2011-07-03	7		1	0	1	2	2.7	9	9	999	X Y	0	0	0	0	0	0	0	0	0	0	0	0	0	0	0	1	1	birth asphyxia	2			2
95	2019-02-16 12:26:37	rgebeyehu@clintonhealthaccess.org	2019-02-04	Remrim Gebeyehu		CHAI		1	103	1003	243654	2011-06-03	2011-06-03	7		1	0	1	1	2.9	9	9	999	X Y	0	0	0	0	0	0	0	0	0	0	0	0	0	0	0	1	1	B. asphyxia	2			2
96	2019-02-17 09:41:56	rgebeyehu@clintonhealthaccess.org	2019-02-04	Remrim Gebeyehu		CHAI		1	103	1003	243581	2011-06-03	2011-06-03	7		1	0	1	2	1.7	9	9	999	Y	0	0	0	0	0	0	0	0	0	0	0	0	0	0	0	0	1		2			2
97	2019-02-17 09:49:09	rgebeyehu@clintonhealthaccess.org	2019-02-04	Remrim Gebeyehu		CHAI		1	103	1003	243754	2011-09-03	2011-09-03	1		1	0	1	2	2.9	9	9	999	X	0	0	0	0	0	0	0	0	0	0	0	0	0	0	0	1	0	Birth Asphyxia	2			2
98	2019-02-17 10:01:05	rgebeyehu@clintonhealthaccess.org	2019-02-13	Remrim Gebeyehu		CHAI		1	103	1003	70907	23/01/11	23/01/11	9	treated as out patient; priscribed antibiotic and appointed after three days	3	24	3	1	11	86	37.5	49	A B	1	1	0	0	0	0	0	0	0	0	0	0	0	0	0	0	0		2			2
99	2019-02-17 10:06:27	rgebeyehu@clintonhealthaccess.org	2019-02-04	Remrim Gebeyheu		CHAI		1	103	1003	241776	2011-03-02	2011-03-02	1		1	0	1	1	2.9	9	9	999	X	0	0	0	0	0	0	0	0	0	0	0	0	0	0	0	1	0	B.asphyxia	2			2
100	2019-02-17 10:10:58	rgebeyehu@clintonhealthaccess.org	2019-02-04	Remrim Gebeyehu		CHAI		1	103	1003	242254	13/02/11	13/02/11	3		1	0	1	1	3.5	9	9	999	X	0	0	0	0	0	0	0	0	0	0	0	0	0	0	0	1	0	Birth asphyxia	2			2
101	2019-02-17 10:17:16	rgebeyehu@clintonhealthaccess.org	2019-02-04	Remrim Gebeyehu		CHAI		1	103	1003	242562	17/02/11	17/02/11	3		1	0	1	1	3.6	9	9	999	X	0	0	0	0	0	0	0	0	0	0	0	0	0	0	0	1	0	B. asphyxia	2			2
102	2019-02-17 10:21:40	rgebeyehu@clintonhealthaccess.org	2019-02-04	Remrim Gebeyehu		CHAI		1	103	1003	9	19/02/11	19/02/11	3		1	0	1	2	2.6	9	9	999	X	0	0	0	0	0	0	0	0	0	0	0	0	0	0	0	1	0	B. asphyxia	2			2
103	2019-02-17 10:25:21	rgebeyehu@clintonhealthaccess.org	2019-02-04	Remrim Gebeyehu		CHAI		1	103	1003	241864	2011-05-02	2011-05-02	7		1	0	1	1	3.8	9	9	999	X	0	0	0	0	0	0	0	0	0	0	0	0	0	0	0	1	0	Asphyxia	2			2
104	2019-02-17 10:28:42	rgebeyehu@clintonhealthaccess.org	2019-02-04	Remrim Gebeyehu		CHAI		1	103	1003	243090	27/02/11	27/02/11	10		1	0	1	1	3.1	9	9	999	Y	0	0	0	0	0	0	0	0	0	0	0	0	0	0	0	0	1		2			2
105	2019-02-17 10:33:12	rgebeyehu@clintonhealthaccess.org	2019-02-04	Remrim Gebeyehu		CHAI		1	103	1003	243273	30/02/11	30/02/11	10		1	0	1	2	2.3	9	9	999	X	0	0	0	0	0	0	0	0	0	0	0	0	0	0	0	1	0	B. asphyxia	2			2
106	2019-02-17 10:39:38	rgebeyehu@clintonhealthaccess.org	2019-02-04	Remrim Gebeyehu		CHAI		1	103	1003	243296	30/02/11	30/02/11	7		1	0	1	1	3.2	9	9	999	X	0	0	0	0	0	0	0	0	0	0	0	0	0	0	0	1	0	B. asphyxia	2			2
107	2019-02-17 10:43:35	rgebeyehu@clintonhealthaccess.org	2019-02-04	Remrim Gebeyehu		CHAI		1	103	1003	243047	26/02/11	26/02/11	9	B. asphyxia	1	0	1	2	3	9	9	999	X	0	0	0	0	0	0	0	0	0	0	0	0	0	0	0	1	0	B.asphyxia	2			2
108	2019-02-17 10:47:57	rgebeyehu@clintonhealthaccess.org	2019-02-04	Remrim Gebeyehu		CHAI		1	103	1003	243362	2011-03-03	2011-03-03	7		1	10	2	2	7.5	9	9	61	A B D K M	1	1	0	1	0	0	0	0	0	0	1	0	1	0	0	0	0		2			2
109	2019-02-17 10:52:01	rgebeyehu@clintonhealthaccess.org	2019-02-04	Remrim Gebeyehu		CHAI		1	103	1003	242965	26/02/11	26/02/11	1		1	0	1	2	3.4	9	9	999	X	0	0	0	0	0	0	0	0	0	0	0	0	0	0	0	1	0	B. asphyxia	2			2
110	2019-02-17 10:55:48	rgebeyehu@clintonhealthaccess.org	2019-02-05	Remrim Gebeyehu		CHAI		1	103	1003	241796	2011-05-02	2011-05-02	7		1	4	2	2	6.5	62	38.5	63	A B G K M	1	1	0	0	0	0	1	0	0	0	1	0	1	0	0	0	0		2			2
111	2019-02-17 10:59:51	rgebeyehu@clintonhealthaccess.org	2019-02-05	Remrim Gebeyehu		CHAI		1	103	1003	226266	15/02/11	15/02/11	7		2	12	3	2	9	9	38	68	A G L M	1	0	0	0	0	0	1	0	0	0	0	1	1	0	0	0	0		2			2
112	2019-02-17 11:03:19	rgebeyehu@clintonhealthaccess.org	2019-02-05	Remrim Gebeyehu		CHAI		1	103	1003	241566	30/01/11	30/01/11	7		1	10	2	2	9	72	9	58	A B G K	1	1	0	0	0	0	1	0	0	0	1	0	0	0	0	0	0		2			2
113	2019-02-17 11:06:36	rgebeyehu@clintonhealthaccess.org	2019-02-05	Remrim Gebeyehu		CHAI		1	103	1003	236822	2011-12-03	2011-12-03	7		1	5	2	2	99	65	9	63	A K M	1	0	0	0	0	0	0	0	0	0	1	0	1	0	0	0	0		2			2
114	2019-02-17 11:11:38	rgebeyehu@clintonhealthaccess.org	2019-02-05	Remrim Gebeyehu		CHAI		1	103	1003	245802	16/04/11	16/04/11	7		2	14	3	1	12	79	37.8	67	A B G K M	1	1	0	0	0	0	1	0	0	0	1	0	1	0	0	0	0		2			2
115	2019-02-17 11:15:16	rgebeyehu@clintonhealthaccess.org	2019-02-05	Remrim Gebeyehu		CHAI		1	103	1003	244007	14/03/11	14/03/11	1		1	0	1	2	3.5	9	9	9	X	0	0	0	0	0	0	0	0	0	0	0	0	0	0	0	1	0	B. asphyxia	2			2
116	2019-02-17 11:18:34	rgebeyehu@clintonhealthaccess.org	2019-02-04	Remrim Gebeyehu		CHAI		1	103	1003	243932	2011-12-03	2011-12-03	7		1	0	1	1	2.7	9	9	999	X	0	0	0	0	0	0	0	0	0	0	0	0	0	0	0	1	0	B.asphyxia	2			2
117	2019-02-17 11:24:56	rgebeyehu@clintonhealthaccess.org	2019-02-04	Remrim Gebeyehu		CHAI		1	103	1003	243843	2011-11-03	2011-11-03	7		1	0	1	2	2.5	9	9	999	X	0	0	0	0	0	0	0	0	0	0	0	0	0	0	0	1	0	B. asphyxia	2			2
118	2019-02-17 11:28:31	rgebeyehu@clintonhealthaccess.org	2019-02-04	Remrim Gebeyehu		CHAI		1	103	1003	244419	20/03/11	20/03/11	1		1	0	1	1	2.5	9	9	999	X	0	0	0	0	0	0	0	0	0	0	0	0	0	0	0	1	0	B.asphyxia	2			2
119	2019-02-17 11:32:38	rgebeyehu@clintonhealthaccess.org	2019-02-04	Remrim Gebeyehu		CHAI		1	103	1003	244008	14/03/11	14/03/11	1		1	0	1	2	3.5	9	9	999	X	0	0	0	0	0	0	0	0	0	0	0	0	0	0	0	1	0	B. asphyxia	2			2
120	2019-02-17 11:37:19	rgebeyehu@clintonhealthaccess.org	2019-02-04	Remrim Gebeyehu		CHAI		1	103	1003	244498	23/03/11	23/03/11	1		1	0	1	1	3.5	9	9	999	X	0	0	0	0	0	0	0	0	0	0	0	0	0	0	0	1	0	B.asphyxia	2			2
121	2019-02-17 11:44:28	rgebeyehu@clintonhealthaccess.org	2019-02-04	Remrim Gebeyehu		CHAI		1	103	1003	244769	26/03/11	26/03/11	7		1	0	1	1	3	9	9	999	X	0	0	0	0	0	0	0	0	0	0	0	0	0	0	0	1	0	B.asphyxia	2			2
122	2019-02-17 11:47:53	rgebeyehu@clintonhealthaccess.org	2019-02-04	Remrim Gebeyehu		CHAI		1	103	1003	244597	24/03/11	24/03/11	7		1	0	1	1	2.7		9	999	X	0	0	0	0	0	0	0	0	0	0	0	0	0	0	0	1	0	B. asphyxia	2			2
123	2019-02-17 11:54:26	rgebeyehu@clintonhealthaccess.org	2019-02-04	Remrim Gebeyehu		CHAI		1	103	1003	244805	27/03/11	27/03/11	7		1	0	1	1	2.7	9	9	999	X	0	0	0	0	0	0	0	0	0	0	0	0	0	0	0	1	0	B. asphyxia	2			2
124	2019-02-17 11:59:15	rgebeyehu@clintonhealthaccess.org	2019-02-04	Remrim Gebeyehu		CHAI		1	103	1003	245190	2011-03-04	2011-03-04	7		1	0	1	2	3.1	9	9	999	X	0	0	0	0	0	0	0	0	0	0	0	0	0	0	0	1	0	B.asphyxia	2			2
125	2019-02-17 12:04:54	rgebeyehu@clintonhealthaccess.org	2019-02-04	Remrim Gebeyehu		CHAI		1	103	1003	245652	13/04/11	13/04/11	7		1	0	1	1	2.9	9	9	999	X	0	0	0	0	0	0	0	0	0	0	0	0	0	0	0	1	0	B.asphyxia	2			2
126	2019-02-17 12:09:23	rgebeyehu@clintonhealthaccess.org	2019-02-04	Remrim Gebeyehu		CHAI		1	103	1003	245336	2011-07-04	2011-07-04	1		1	0	1	2	3	9	9	999	X	0	0	0	0	0	0	0	0	0	0	0	0	0	0	0	1	0	B.asphyxia	2			2
127	2019-02-17 12:13:59	rgebeyehu@clintonhealthaccess.org	2019-02-04	Remrim Gebeyehu		CHAI		1	103	1003	245769	16/04/11	16/04/11	1		1	0	1	1	3.8	9	9	999	X	0	0	0	0	0	0	0	0	0	0	0	0	0	0	0	1	0	Birth Asphyxia	2			2
128	2019-02-17 12:18:03	rgebeyehu@clintonhealthaccess.org	2019-02-04	Remrim Gebeyehu		CHAI		1	103	1003	241258	24/01/11	24/01/11	7		1	0	1	1	3.1	9	9	999	X	0	0	0	0	0	0	0	0	0	0	0	0	0	0	0	1	0	B.asphyxia	2			2
129	2019-02-17 12:21:51	rgebeyehu@clintonhealthaccess.org	2019-02-04	Remrim Gebeyehu		CHAI		1	103	1003	9	27/03/11	27/01/11	7		1	0	1	2	2.8	9	9	999	X	0	0	0	0	0	0	0	0	0	0	0	0	0	0	0	1	0	B.asphyxia	2			2
130	2019-02-17 12:25:29	rgebeyehu@clintonhealthaccess.org	2019-02-04	Remrim Gebeyehu		CHAI		1	103	1003	245811	16/04/11	16/04/11	7		1	0	1	1	4	9	9	999	X	0	0	0	0	0	0	0	0	0	0	0	0	0	0	0	1	0	B. asphyxia	2			2
131	2019-02-17 12:30:01	rgebeyehu@clintonhealthaccess.org	2019-02-04	Remrim Gebeyehu		CHAI		1	103	1003	241312	25/01/11	25/01/11	1		1	0	1	2	3	9	9	999	X	0	0	0	0	0	0	0	0	0	0	0	0	0	0	0	1	0	B.asphyxia	2			2
132	2019-02-17 12:34:36	rgebeyehu@clintonhealthaccess.org	2019-02-04	Remrim Gebeyehu		CHAI		1	103	1003	241355	27/01/11	27/01/11	7		1	0	1	2	2.4	9	9	999	X	0	0	0	0	0	0	0	0	0	0	0	0	0	0	0	1	0	B.asphyxia	2			2
133	2019-02-17 12:38:18	rgebeyehu@clintonhealthaccess.org	2019-02-04	Remrim Gebeyehu		CHAI		1	103	1003	241594	2011-01-02	2011-01-02	7		1	0	1	2	4	9	9	999	X	0	0	0	0	0	0	0	0	0	0	0	0	0	0	0	1	0	b.asphyxia	2			2
134	2019-02-17 12:48:03	rgebeyehu@clintonhealthaccess.org	2019-02-05	Remrim Gebeyehu		CHAI		1	103	1003	231989	2011-07-03	2011-07-03	10		1	8	2	2	7.5	69	37.5	64	A B G	1	1	0	0	0	0	1	0	0	0	0	0	0	0	0	0	0		2			2
135	2019-02-18 10:16:19	rgebeyehu@clintonhealthaccess.org	2019-02-13	Remrim Gebeyehu		CHAI		1	103	1003	241692	2011-02-02	2011-02-02	9	Treated as out patient	1	3	2	1	5.5	62	9	71	A B	1	1	0	0	0	0	0	0	0	0	0	0	0	0	0	0	0		2			2
136	2019-02-18 10:25:48	rgebeyehu@clintonhealthaccess.org	2019-02-13	Remrim Gebeyehu		CHAI		1	103	1003	234957	2011-01-02	2011-01-02	9	treated as out patient	1	4	2	2	6	64	9	49	A B	1	1	0	0	0	0	0	0	0	0	0	0	0	0	0	0	0		2			2
137	2019-02-18 12:43:57	ttumbule@clintonhealthaccess.org	2019-01-30	Tegegn Chote		CHAI		3	302	3003	05814/11	2011-12-04	9	10		4	36	3	2	12	87	36.4	42	A B I	1	1	0	0	0	0	0	0	1	0	0	0	0	0	0	0	0		2			2
138	2019-02-18 13:12:55	ttumbule@clintonhealthaccess.org	2019-01-30	Tegegn Chote		CHAI		3	302	3003	05768/11	2011-11-04	9	10		1	3	2	2	5	54	37.6	56	A B	1	1	0	0	0	0	0	0	0	0	0	0	0	0	0	0	0		2			2
139	2019-02-18 13:19:13	ttumbule@clintonhealthaccess.org	2019-01-30	Tegegn Chot		CHAI		3	302	3003	18359/10	2011-11-04	9	10		3	26	3	1	14	75	36.7	42	A B D N	1	1	0	1	0	0	0	0	0	0	0	0	0	1	0	0	0		2			2
140	2019-02-18 13:24:12	ttumbule@clintonhealthaccess.org	2019-01-30	Tegegn Chote		CHAI		3	302	3003	05770/11	2011-10-04	9	10		1	3	2	1	4.8	60	36.5	52	A B	1	1	0	0	0	0	0	0	0	0	0	0	0	0	0	0	0		2			2
141	2019-02-18 13:27:54	ttumbule@clintonhealthaccess.org	2019-01-30	Tegegn Chote		CHAI		3	302	3003	04218/11	2011-10-04	9	10		1	2	2	1	6	55	35.6	59	A B C	1	1	1	0	0	0	0	0	0	0	0	0	0	0	0	0	0		2			2
142	2019-02-18 13:32:35	ttumbule@clintonhealthaccess.org	2019-01-30	Tegegn Chote		CHAI		3	302	3003	06196/11	18/4/11	9	10		1	2	2	1	44	55	36.9	60	A B	1	1	0	0	0	0	0	0	0	0	0	0	0	0	0	0	0		2			2
143	2019-02-18 14:25:12	rgebeyehu@clintonhealthaccess.org	2019-02-13	Remrim Gebeyehu		CHAI		1	103	1003	226636	2011-01-02	2011-01-02	9	treated as out patient	1	10	2	2	9	68	9	68	A B	1	1	0	0	0	0	0	0	0	0	0	0	0	0	0	0	0		2			2
144	2019-02-18 14:29:04	rgebeyehu@clintonhealthaccess.org	2019-02-13	Remrim Gebeyehu		CHAI		1	103	1003	226741	19/03/11	19/03/11	9	treated as out patient	1	11	2	1	10	69	37.8	63	A B G	1	1	0	0	0	0	1	0	0	0	0	0	0	0	0	0	0		2			2
145	2019-02-18 14:35:28	rgebeyehu@clintonhealthaccess.org	2019-02-13	Remrim Gebeyehu		CHAI		1	103	1003	229234	28/01/11	28/01/11	9	Treated as out patient	2	20	3	2	11	88	9	49	A B	1	1	0	0	0	0	0	0	0	0	0	0	0	0	0	0	0		2			2
146	2019-02-18 14:39:05	rgebeyehu@clintonhealthaccess.org	2019-02-13	Remrim Gebeyehu		CHAI		1	103	1003	224016	25/01/11	25/01/11	9	Treated as out patient	2	15	3	1	11	71	9	56	A B	1	1	0	0	0	0	0	0	0	0	0	0	0	0	0	0	0		2			2
147	2019-02-18 14:42:40	rgebeyehu@clintonhealthaccess.org	2019-02-13	Remrim Gebeyehu		CHAI		1	103	1003	229586	29/01/11	29/01/11	9	Treated as out patient	1	10	2	1	10	73	9	56	A B	1	1	0	0	0	0	0	0	0	0	0	0	0	0	0	0	0		2			2
148	2019-02-18 14:46:24	rgebeyehu@clintonhealthaccess.org	2019-02-13	Remrim Gebeyehu		CHAI		1	103	1003	242840	22/02/11	22/02/11	9	Treated as out patient	2	18	3	1	10	76	37.7	60	A B G	1	1	0	0	0	0	1	0	0	0	0	0	0	0	0	0	0		2			2
149	2019-02-18 14:49:54	rgebeyehu@clintonhealthaccess.org	2019-02-13	Remrim Gebeyheu		CHAI		1	103	1003	241022	21/01/11	21/01/11	9	Treated as out patient	1	6	2	1	7	9	9	56	A B	1	1	0	0	0	0	0	0	0	0	0	0	0	0	0	0	0		2			2
150	2019-02-18 14:55:02	rgebeyehu@clintonhealthaccess.org	2019-02-13	Remrim Gebeyehu		CHAI		1	103	1003	242790	21/02/11	21/02/11	9	Treated as out patient	2	14	3	2	9	72	37.8	56	A B G	1	1	0	0	0	0	1	0	0	0	0	0	0	0	0	0	0		2			2
151	2019-02-18 15:00:26	rgebeyehu@clintonhealthaccess.org	2019-02-13	Remrim Gebeyehu		CHAI		1	103	1003	229529	21/02/11	21/02/11	9	Treated as out patient	1	8	2	1	6	63	38	58	A B G	1	1	0	0	0	0	1	0	0	0	0	0	0	0	0	0	0		2			2
152	2019-02-18 15:07:13	rgebeyehu@clintonhealthaccess.org	2019-02-13	Remrim Gebeyehu		CHAI		1	103	1003	242704	22/02/11	22/02/22	9	Treated as out patient	2	16	3	1	99	9	36.8	42	A	1	0	0	0	0	0	0	0	0	0	0	0	0	0	0	0	0		2			2
153	2019-02-18 15:11:53	rgebeyehu@clintonhealthaccess.org	2019-02-13	Remrim Gebeyehu		CHAI		1	103	1003	228395	22/02/11	22/02/11	9	Treated as out patient	1	9	2	1	9	9	37.8	72	A	1	0	0	0	0	0	0	0	0	0	0	0	0	0	0	0	0		2			2
154	2019-02-18 15:24:32	rgebeyehu@clintonhealthaccess.org	2019-02-13	Remrim Gebeyehu		CHAI		1	103	1003	242704	20/02/11	20/02/11	9	Treated as out patient	2	16	3	1	99	9	36.8	42	A	1	0	0	0	0	0	0	0	0	0	0	0	0	0	0	0	0		2			2
155	2019-02-18 15:29:12	rgebeyehu@clintonhealthaccess.org	2019-02-13	Remrim Gebeyehu		CHAI		1	103	1003	228059	16/02/11	16/02/11	9	Treated as out patient	1	9	2	1	8.5	69	9	52	A B	1	1	0	0	0	0	0	0	0	0	0	0	0	0	0	0	0		2			2
156	2019-02-18 15:33:39	rgebeyehu@clintonhealthaccess.org	2019-02-13	Remrim Gebeyehu		CHAI		1	103	1003	230300	15/02/11	15/02/11	9	Treated as out patient	4	38	3	1	15	97	39	53	A B G	1	1	0	0	0	0	1	0	0	0	0	0	0	0	0	0	0		2			2
157	2019-02-18 15:37:38	rgebeyehu@clintonhealthaccess.org	2019-02-13	Remrim Gebeyehu		CHAI		1	103	1003	237231	2011-12-02	2011-12-02	9	Treated as out patient	1	3	2	2	6	9	37.5	76	A B G	1	1	0	0	0	0	1	0	0	0	0	0	0	0	0	0	0		2			2
158	2019-02-18 15:41:01	rgebeyehu@clintonhealthaccess.org	2019-02-13	Remrim Gebeyehu		CHAI		1	103	1003	200038	13/02/11	13/02/11	9	Treated as out patient	3	24	3	1	11	73	37.8	56	A B G	1	1	0	0	0	0	1	0	0	0	0	0	0	0	0	0	0		2			2
159	2019-02-18 15:45:22	rgebeyehu@clintonhealthaccess.org	2019-02-13	Remrim Gebeyehu		CHAI		1	103	1003	240312	13/02/11	13/02/11	9	Managed as out patient	1	8	2	1	9	66	9	52	A B	1	1	0	0	0	0	0	0	0	0	0	0	0	0	0	0	0		2			2
160	2019-02-18 15:48:54	rgebeyehu@clintonhealthaccess.org	2019-02-13	Remrim Gebeyehu		CHAI		1	103	1003	242055	2011-08-02	2011-08-02	9	Managed as out patient	1	4	2	1	6	60	9	60	A B	1	1	0	0	0	0	0	0	0	0	0	0	0	0	0	0	0		2			2
161	2019-02-18 15:52:03	rgebeyehu@clintonhealthaccess.org	2019-02-13	Remrim Gebeyehu		CHAI		1	103	1003	225217	2011-08-02	2011-08-02	9	Managed as out patient	1	11	2	1	8	82	37.5	52	A B G	1	1	0	0	0	0	1	0	0	0	0	0	0	0	0	0	0		2			2
162	2019-02-18 16:20:16	rgebeyehu@clintonhealthaccess.org	2019-02-13	Remrim Gebeyehu		CHAI		1	103	1003	215799	2011-08-02	2011-08-02	9	Managed as out patient	2	19	3	2	10	81	38	52	A B	1	1	0	0	0	0	0	0	0	0	0	0	0	0	0	0	0		2			2
163	2019-02-18 16:23:28	rgebeyehu@clintonhealthaccess.org	2019-02-13	Remrim Gebeyehu		CHAI		1	103	1003	234998	2011-05-02	2011-05-02	9	Managed as out patient	1	5	2	2	6	59	9	59	A B	1	1	0	0	0	0	0	0	0	0	0	0	0	0	0	0	0		2			2
164	2019-02-18 16:27:42	rgebeyehu@clintonhealthaccess.org	2019-02-13	Remrim Gebeyehu		CHAI		1	103	1003	72583	2011-05-02	2011-05-02	9	Managed as out patient	1	11	2	1	9	79	9	36	A N	1	0	0	0	0	0	0	0	0	0	0	0	0	1	0	0	0		2			2
165	2019-02-18 16:30:52	rgebeyehu@clintonhealthaccess.org	2019-02-13	Remrim Gebeyehu		CHAI		1	103	1003	223786	2011-02-02	2011-02-02	9	Managed as out patient	1	9	2	1	9	74	38.1	48	A B G	1	1	0	0	0	0	1	0	0	0	0	0	0	0	0	0	0		2			2
166	2019-02-18 16:33:50	rgebeyehu@clintonhealthaccess.org	2019-02-13	Remrim Gebeyehu		CHAI		1	103	1003	50511	19/03/11	19/03/11	9	Managed as out patient	4	39	3	2	15	86	37.3	45	A B G	1	1	0	0	0	0	1	0	0	0	0	0	0	0	0	0	0		2			2
167	2019-02-18 16:37:20	rgebeyehu@clintonhealthaccess.org	2019-02-13	Remrim Gebeyehu		CHAI		1	103	1003	241455	29/01/11	29/01/11	9	Managed as out patient	2	16	3	1	10	72	9	46	A B	1	1	0	0	0	0	0	0	0	0	0	0	0	0	0	0	0		2			2
168	2019-02-18 16:44:10	rgebeyehu@clintonhealthaccess.org	2019-02-13	Remrim Gebeyehu		CHAI		1	103	1003	236474	30/01/11	30/01/11	9	Managed as out patient	1	4	2	2	99	9	9	62	A	1	0	0	0	0	0	0	0	0	0	0	0	0	0	0	0	0		2			2
169	2019-02-18 16:48:15	rgebeyehu@clintonhealthaccess.org	2019-02-13	Remrim Gebeyehu		CHAI		1	103	1003	68917	30/01/11	30/01/11	9	Managed as out patient	3	26	3	1	11	82	9	49	A B	1	1	0	0	0	0	0	0	0	0	0	0	0	0	0	0	0		2			2
170	2019-02-18 16:58:03	rgebeyehu@clintonhealthaccess.org	2019-02-13	Remrim Gebeyehu		CHAI		1	103	1003	224743	18/03/11	18/03/11	9	Managed as out patient	2	13	3	1	11	78	9	52	A B	1	1	0	0	0	0	0	0	0	0	0	0	0	0	0	0	0		2			2
171	2019-02-18 17:01:20	rgebeyehu@clintonhealthaccess.org	2019-02-13	Remrim Gebeyehu		CHAI		1	103	1003	237743	18/03/11	18/03/11	9	Managed as out patient	1	4	2	2	6.5	63	9	68	A B	1	1	0	0	0	0	0	0	0	0	0	0	0	0	0	0	0		2			2
172	2019-02-18 17:04:35	rgebeyehu@clintonhealthaccess.org	2019-02-13	Remrim Gebeyehu		CHAI		1	103	1003	224926	28/02/22	28/02/11	9	Managed as out patient	2	13	3	1	10	81	37.8	61	A B G	1	1	0	0	0	0	1	0	0	0	0	0	0	0	0	0	0		2			2
173	2019-02-18 17:07:52	rgebeyehu@clintonhealthaccess.org	2019-02-13	Remrim Gebeyehu		CHAI		1	103	1003	236477	26/02/11	26/02/11	9	Managed as out patient	1	4	2	1	7	9	9	56	A B	1	1	0	0	0	0	0	0	0	0	0	0	0	0	0	0	0		2			2
174	2019-02-18 17:11:14	rgebeyehu@clintonhealthaccess.org	2019-02-13	Remrim Gebeyehu		CHAI		1	103	1003	237747	26/02/11	26/02/11	9	Managed as out patient	1	3	2	1	5.3	9	9	68	A B	1	1	0	0	0	0	0	0	0	0	0	0	0	0	0	0	0		2			2
175	2019-02-18 17:14:20	rgebeyehu@clintonhealthaccess.org	2019-02-13	Remrim Gebeyehu		CHAI		1	103	1003	230352	29/02/11	29/02/11	9	Managed as out patient	1	8	2	2	9	68	36.3	56	A B	1	1	0	0	0	0	0	0	0	0	0	0	0	0	0	0	0		2			2
176	2019-02-18 17:17:35	rgebeyehu@clintonhealthaccess.org	2019-02-13	Remrim Gebeyehu		CHAI		1	103	1003	219948	26/02/11	26/02/11	9	Managed as out patient	2	14	3	2	10	74	9	49	A	1	0	0	0	0	0	0	0	0	0	0	0	0	0	0	0	0		2			2
177	2019-02-18 17:21:09	rgebeyehu@clintonhealthaccess.org	2019-02-13	Remrim Gebeyehu		CHAI		1	103	1003	235873	29/02/11	29/02/11	9	Managed as out patient	1	5	2	1	6	65	9	58	A	1	0	0	0	0	0	0	0	0	0	0	0	0	0	0	0	0		2			2
178	2019-02-18 17:24:47	rgebeyehu@clintonhealthaccess.org	2019-02-13	Remrim Gebeyehu		CHAI		1	103	1003	228156	30/02/11	30/02/11	9	Managed as out patient	1	9	2	2	8	68	37.5	56	A B G	1	1	0	0	0	0	1	0	0	0	0	0	0	0	0	0	0		2			2
179	2019-02-18 17:29:24	rgebeyehu@clintonhealthaccess.org	2019-02-13	Remrim Gebeyehu		CHAI		1	103	1003	228251	2011-03-03	2011-03-03	9	Managed as out patient	1	9	2	1	8.5	71	9	59	A B	1	1	0	0	0	0	0	0	0	0	0	0	0	0	0	0	0		2			2
180	2019-02-18 17:32:39	rgebeyehu@clintonhealthaccess.org	2019-02-13	Remrim Gebeyehu		CHAI		1	103	1003	243376	2011-03-03	2011-03-03	9	Managed as out patient	1	9	2	1	8.5	69	37.8	61	A B G	1	1	0	0	0	0	1	0	0	0	0	0	0	0	0	0	0		2			2
181	2019-02-18 17:36:59	rgebeyehu@clintonhealthaccess.org	2019-02-13	Remrim Gebeyehu		CHAI		1	103	1003	230345	2011-04-03	2011-04-03	9	Managed as out patient	1	7	2	1	6.5	67	37.5	62	A B G	1	1	0	0	0	0	1	0	0	0	0	0	0	0	0	0	0		2			2
182	2019-02-18 17:41:21	rgebeyehu@clintonhealthaccess.org	2019-02-13	Remrim Gebeyehu		CHAI		1	103	1003	4734	2011-07-03	2011-07-03	9	Managed as out patient	3	24	3	1	12	87	37.5	56	A B G	1	1	0	0	0	0	1	0	0	0	0	0	0	0	0	0	0		2			2
183	2019-02-18 17:46:48	rgebeyehu@clintonhealthaccess.org	2019-02-13	Remrim Gebeyehiu		CHAI		1	103	1003	233753	14/03/11	14/03/11	9	Managed as out patient	1	6	2	2	7.5	71	37.5	56	A B G	1	1	0	0	0	0	1	0	0	0	0	0	0	0	0	0	0		2			2
184	2019-02-18 17:50:37	rgebeyehu@clintonhealthaccess.org	2019-02-13	Remrim Gebeyehu		CHAI		1	103	1003	243979	13/03/11	13/03/11	9	Managed as out patient	1	8	2	1	7.5	68	9	65	A B	1	1	0	0	0	0	0	0	0	0	0	0	0	0	0	0	0		2			2
185	2019-02-18 17:54:26	rgebeyehu@clintonhealthaccess.org	2019-02-13	Remrim Gebeyehu		CHAI		1	103	1003	17471	2011-12-03	2011-12-03	9	Managed as out patient	5	52	3	1	15	98	37	58	A B G	1	1	0	0	0	0	1	0	0	0	0	0	0	0	0	0	0		2			2
186	2019-02-18 17:58:45	rgebeyehu@clintonhealthaccess.org	2019-02-13	Remrim Gebeyehu		CHAI		1	103	1003	2011-10-03	2011-10-03	2011-10-03	9	Managed as out patient	1	3	2	1	6.5	9	9	51	A B	1	1	0	0	0	0	0	0	0	0	0	0	0	0	0	0	0		2			2
187	2019-02-18 18:02:51	rgebeyehu@clintonhealthaccess.org	2019-02-13	Remrim Gebeyehu		CHAI		1	103	1003	239316	17/03/11	17/03/11	9	Managed as out patient	3	32	3	2	12	81	9	53	A B	1	1	0	0	0	0	0	0	0	0	0	0	0	0	0	0	0		2			2
188	2019-02-23 14:53:51	rgebeyehu@clintonhealthaccess.org	2019-02-14	Remrim Gebeyehu		CHAI		1	102	1002	39526	28/01/11	28/01/11	9	Managed as out patient	2	21	3	1	9	9	37	52	A G	1	0	0	0	0	0	1	0	0	0	0	0	0	0	0	0	0		2			2
189	2019-02-23 14:58:01	rgebeyehu@clintonhealthaccess.org	2019-02-14	Remrim Gebeyehu		CHAI		1	102	1002	57720	28/01/11	28/01/11	9	Managed as out patient	1	10	2	1	8.3	9	37.7	56	A B G	1	1	0	0	0	0	1	0	0	0	0	0	0	0	0	0	0		2			2
190	2019-02-23 15:02:33	rgebeyehu@clintonhealthaccess.org	2019-02-14	Remrim Gebeyehu		CHAI		1	102	1002	50652	28/01/11	28/01/11	9	Managed as out patient	1	3	2	1	5.8	9	37	80	A B G	1	1	0	0	0	0	1	0	0	0	0	0	0	0	0	0	0		2			2
191	2019-02-23 15:08:13	rgebeyehu@clintonhealthaccess.org	2019-02-14	Remrim Gebeyehu		CHAI		1	102	1002	28/01/11	28/01/11	28/01/11	9	Managed as out patient	2	12	3	1	7.5	9	37.5	60	A B N	1	1	0	0	0	0	0	0	0	0	0	0	0	1	0	0	0		2			2
192	2019-02-23 15:13:34	rgebeyehu@clintonhealthaccess.org	2019-02-14	Remrim Gebeyehu		CHAI		1	102	1002	75456	28/01/11	28/01/11	9	Managed as out patient	2	12	3	1	7.8	9	37.2	68	A G N	1	0	0	0	0	0	1	0	0	0	0	0	0	1	0	0	0		2			2
193	2019-02-23 15:16:58	rgebeyehu@clintonhealthaccess.org	2019-02-14	Remrim Gebeyehu		CHAI		1	102	1002	40345	28/01/11	28/01/11	9	Managed as out patient	1	8	2	1	9.2	9	36.5	60	A G	1	0	0	0	0	0	1	0	0	0	0	0	0	0	0	0	0		2			2
194	2019-02-23 15:21:42	rgebeyehu@clintonhealthaccess.org	2019-02-14	Remrim Gebeyehu		CHAI		1	102	1002	72536	23/01/11	23/01/11	9	Managed as out patient	1	4	2	2	6.8	9	36.4	52	A B G	1	1	0	0	0	0	1	0	0	0	0	0	0	0	0	0	0		2			2
195	2019-02-23 15:25:46	rgebeyehu@clintonhealthaccess.org	2019-02-14	Remrim Gebeyehu		CHAI		1	102	1002	23/01/11	23/01/11	23/01/11	9	Managed as out patient	2	13	3	2	9	9	38.1	46	A G	1	0	0	0	0	0	1	0	0	0	0	0	0	0	0	0	0		2			2
196	2019-02-23 15:30:34	rgebeyehu@clintonhealthaccess.org	2019-02-14	Remrim Gebeyehu		CHAI		1	102	1002	80878	30/01/11	30/01/11	9	Managed as out patient	1	8	2	2	8	9	38.4	56	A G	1	0	0	0	0	0	1	0	0	0	0	0	0	0	0	0	0		2			2
197	2019-02-23 15:34:06	rgebeyehu@clintonhealthaccess.org	2019-02-14	Remrim Gebeyehu		CHAI		1	102	1002	77479	30/01/11	30/01/11	9	Managed as out patient	1	3	2	1	4.5	9	36.6	76	A	1	0	0	0	0	0	0	0	0	0	0	0	0	0	0	0	0		2			2
198	2019-02-23 15:38:49	rgebeyehu@clintonhealthaccess.org	2019-02-14	Remrim Gebeyehu		CHAI		1	102	1002	80883	30/01/11	30/01/11	9	Managed as out patient	1	12	3	2	9	9	36	64	A G	1	0	0	0	0	0	1	0	0	0	0	0	0	0	0	0	0		2			2
199	2019-02-23 15:42:15	rgebeyehu@clintonhealthaccess.org	2019-02-14	Remrim Gebeyehu		CHAI		1	102	1002	46699	30/01/11	30/01/11	9	Managed as out patient	2	13	3	2	9.3	9	36.8	76	A	1	0	0	0	0	0	0	0	0	0	0	0	0	0	0	0	0		2			2
200	2019-02-23 15:47:11	rgebeyehu@clintonhealthaccess.org	2019-02-14	Remrim Gebeyehu		CHAI		1	102	1002	70806	28/01/11	28/01/11	9	Managed as out Patient	1	8	2	1	8	9	37.7	999	A B M	1	1	0	0	0	0	0	0	0	0	0	0	1	0	0	0	0		2			2
201	2019-02-23 15:51:49	rgebeyehu@clintonhealthaccess.org	2019-02-13	Remrim Gebeyehu		CHAI		1	103	1003	239280	19/01/11	19/01/11	9	Managed as out patient	1	4	2	2	99	63	9	54	A B	1	1	0	0	0	0	0	0	0	0	0	0	0	0	0	0	0		2			2
202	2019-02-23 16:00:11	rgebeyehu@clintonhealthaccess.org	2019-02-13	Remrim Gebeyehu		CHAI		1	103	1003	235534	18/01/11	18/01/11	9	Managed at out patient	1	9	2	1	7	66	36.3	60	A B	1	1	0	0	0	0	0	0	0	0	0	0	0	0	0	0	0		2			2
203	2019-02-23 16:12:22	rgebeyehu@clintonhealthaccess.org	2019-02-13	Remrim Gebeyehu		CHAI		1	103	1003	237008	18/01/11	18/01/11	9	Managed as out patient	1	11	2	1	7	68	36.8	58	A G	1	0	0	0	0	0	1	0	0	0	0	0	0	0	0	0	0		2			2
204	2019-02-23 16:15:57	rgebeyehu@clintonhealthaccess.org	2019-02-13	Remrim Gebeyehu		CHAI		1	103	1003	233240	17/01/11	17/01/11	9	Managed as out patient	1	8	2	1	8	69	9	61	A B	1	1	0	0	0	0	0	0	0	0	0	0	0	0	0	0	0		2			2
205	2019-02-23 16:19:55	rgebeyehu@clintonhealthaccess.org	2019-02-13	Remrim Gebeyehu		CHAI		1	103	1003	245788	16/01/11	16/01/11	9	Managed as out patient	3	31	3	2	10	86	38.5	42	A B G	1	1	0	0	0	0	1	0	0	0	0	0	0	0	0	0	0		2			2
206	2019-02-23 16:50:35	rgebeyehu@clintonhealthaccess.org	2019-02-13	Remrim Gebeyehu		CHAI		1	103	1003	231727	16/01/11	16/01/11	9	managed as out patient	1	9	2	1	9	9	35.8	52	A B	1	1	0	0	0	0	0	0	0	0	0	0	0	0	0	0	0		2			2
207	2019-02-23 16:54:25	rgebeyehu@clintonhealthaccess.org	2019-02-13	Remrim Gebeyehu		CHAI		1	103	1003	231244	15/04/11	15/04/11	9	Managed as out patient	2	12	3	1	10	76	37.8	59	A B G	1	1	0	0	0	0	1	0	0	0	0	0	0	0	0	0	0		2			2
208	2019-02-23 16:58:34	rgebeyehu@clintonhealthaccess.org	2019-02-13	Remrim Gebeyehu		CHAI		1	103	1003	245584	2011-11-04	2011-11-04	9	Managed as out patient	1	5	2	2	6	64	37.6	69	A B G	1	1	0	0	0	0	1	0	0	0	0	0	0	0	0	0	0		2			2
209	2019-02-23 17:02:54	rgebeyehu@clintonhealthaccess.org	2019-02-13	Remrim Gebeyehu		CHAI		1	103	1003	238578	2011-11-04	2011-11-04	9	Managed as out patient	1	5	2	1	6.5	67	37.8	66	A B G	1	1	0	0	0	0	1	0	0	0	0	0	0	0	0	0	0		2			2
210	2019-02-23 17:07:48	rgebeyehu@clintonhealthaccess.org	2019-02-13	Remrim Gebeyehu		CHAI		1	103	1003	245522	2011-10-04	2011-10-04	9	Managed as out patient	2	18	3	1	10	71	9	63	A B	1	1	0	0	0	0	0	0	0	0	0	0	0	0	0	0	0		2			2
211	2019-02-23 17:11:40	rgebeyehu@clintonhealthaccess.org	2019-02-13	Remrim Gebeyehu		CHAI		1	103	1003	243166	14/04/11	14/04/11	9	Managed as out patient	1	8	2	2	7.5	68	37.5	56	A B G	1	1	0	0	0	0	1	0	0	0	0	0	0	0	0	0	0		2			2
212	2019-02-23 17:16:34	rgebeyehu@clintonhealthaccess.org	2019-02-13	Remrim Gebeyehu		CHAI		1	103	1003	237909	2011-09-04	2011-09-04	9	Managed as out patient	1	5	2	1	5.5	62	9	63	A B	1	1	0	0	0	0	0	0	0	0	0	0	0	0	0	0	0		2			2
213	2019-02-23 17:20:56	rgebeyehu@clintonhealthaccess.org	2019-02-13	Remrim Gebeyehu		CHAI		1	103	1003	245365	2011-08-04	2011-08-04	9	Managed as out patient	1	7	2	1	6.5	68	9	58	A B D	1	1	0	1	0	0	0	0	0	0	0	0	0	0	0	0	0		2			2
214	2019-02-23 17:25:43	rgebeyehu@clintonhealthaccess.org	2019-02-13	Remrim Gebeyehu		CHAI		1	103	1003	2011-08-04	2011-08-04	2011-08-04	9	Managed as out patient	1	11	2	2	8	71	37.8	67	A B G	1	1	0	0	0	0	1	0	0	0	0	0	0	0	0	0	0		2			2
215	2019-02-23 17:31:25	rgebeyehu@clintonhealthaccess.org	2019-02-13	Remrim Gebeyehu		CHAI		1	103	1003	245174	2011-03-04	2011-03-04	9	Managed as out patient	1	7	2	1	6.5	9	37.7	64	A B G	1	1	0	0	0	0	1	0	0	0	0	0	0	0	0	0	0		2			2
216	2019-02-23 17:35:31	rgebeyehu@clintonhealthaccess.org	2019-02-13	Remrim Gebeyehu		CHAI		1	103	1003	227676	2011-01-04	2011-01-04	9	Managed as out patient	2	16	3	2	99	76	37.8	59	A B G	1	1	0	0	0	0	1	0	0	0	0	0	0	0	0	0	0		2			2
217	2019-02-23 17:40:18	rgebeyehu@clintonhealthaccess.org	2019-02-13	Remrim Gebeyehu		CHAI		1	103	1003	241462	2011-01-04	2011-01-04	9	Managed as out patient	1	3	2	2	6	64	37.8	67	A B G	1	1	0	0	0	0	1	0	0	0	0	0	0	0	0	0	0		2			2
218	2019-02-23 17:44:49	rgebeyehu@clintonhealthaccess.org	2019-02-13	Remrim Gebeyehu		CHAI		1	103	1003	235412	2011-01-04	2011-01-04	9	Managed as out patient	1	6	2	1	7.5	70	9	58	A B	1	1	0	0	0	0	0	0	0	0	0	0	0	0	0	0	0		2			2
219	2019-02-23 17:49:26	rgebeyehu@clintonhealthaccess.org	2019-02-13	Remrim Gebeyehu		CHAI		1	103	1003	235001	25/03/11	25/03/11	9	Managed as out patient	1	6	2	1	6.5	65	9	59	A B G	1	1	0	0	0	0	1	0	0	0	0	0	0	0	0	0	0		2			2
220	2019-02-23 17:53:52	rgebeyehu@clintonhealthaccess.org	2019-02-13	Remrim Gebeyehu		CHAI		1	103	1003	240871	28/03/11	28/03/11	9	Managed as out patient	1	4	2	1	6.5	66	37.8	63	A B G	1	1	0	0	0	0	1	0	0	0	0	0	0	0	0	0	0		2			2
221	2019-02-23 18:05:12	rgebeyehu@clintonhealthaccess.org	2019-02-13	Remrim Gebeyehu		CHAI		1	103	1003	236243	25/03/11	25/03/11	9	Managed as out patient	1	6	2	2	6.5	63	9	67	A B	1	1	0	0	0	0	0	0	0	0	0	0	0	0	0	0	0		2			2
222	2019-02-23 18:11:26	rgebeyehu@clintonhealthaccess.org	2019-02-13	Remrim Gebeyehu		CHAI		1	103	1003	219158	25/03/11	25/03/11	9	managed as out patient	2	18	3	2	99	9	9	46	A B	1	1	0	0	0	0	0	0	0	0	0	0	0	0	0	0	0		2			2
223	2019-02-23 18:15:01	rgebeyehu@clintonhealthaccess.org	2019-02-13	Remrim Gebeyhu		CHAI		1	103	1003	237402	25/03/11	25/03/11	9	Managed as out patient	1	5	2	2	5.6	67	37.8	69	A B G	1	1	0	0	0	0	1	0	0	0	0	0	0	0	0	0	0		2			2
224	2019-02-23 18:19:14	rgebeyehu@clintonhealthaccess.org	2019-02-13	Remrim Gebeyehu		CHAI		1	103	1003	226426	25/03/11	25/03/11	9	Managed as out patient	2	15	3	2	10	72	9	62	A B	1	1	0	0	0	0	0	0	0	0	0	0	0	0	0	0	0		2			2
225	2019-02-25 14:36:26	akebede@clintonhealthaccess.org	2019-01-30	Abebe kebede		chai		4	401	4001	65134	2011-01-02	2011-01-02	7		1	7	2	2	9.2	82	36.5	999	A C	1	0	1	0	0	0	0	0	0	0	0	0	0	0	0	0	0		2			2
226	2019-02-25 14:41:16	akebede@clintonhealthaccess.org	2019-01-30	Abebe kebede		chai		4	401	4001	61134	2011-01-02	2011-01-02	4		2	12	3	1	10	61	9	48	A	1	0	0	0	0	0	0	0	0	0	0	0	0	0	0	0	0		2			2
227	2019-02-25 14:45:14	akebede@clintonhealthaccess.org	2019-01-30	Abebe kebede		chai		4	401	4001	72558	2011-08-04	2011-08-04	9	no admission	2	13	3	2	7.3	75	9	42	A C K	1	0	1	0	0	0	0	0	0	0	1	0	0	0	0	0	0		2			2
228	2019-02-25 14:49:18	akebede@clintonhealthaccess.org	2019-01-30	Abebe kebede		chai		4	401	4001	40379	2011-02-02	2011-02-02	9	no admission	3	24	3	1	14	78	37.3	38	A	1	0	0	0	0	0	0	0	0	0	0	0	0	0	0	0	0		2			2
229	2019-02-25 14:54:15	akebede@clintonhealthaccess.org	2019-01-30	Abebe kebede		chai		4	401	4001	65268	2011-08-02	2011-08-02	9	no admission	1	9	2	2	7	65	37.8	999	A	1	0	0	0	0	0	0	0	0	0	0	0	0	0	0	0	0		2			2
230	2019-02-25 14:57:55	akebede@clintonhealthaccess.org	2019-01-30	Abebe kebede		chai		4	401	4001	69100	2011-12-02	2011-12-02	4		1	7	2	1	5.2	65	37.9	44	A	1	0	0	0	0	0	0	0	0	0	0	0	0	0	0	0	0		2			2
231	2019-02-25 15:02:00	akebede@clintonhealthaccess.org	2019-01-30	Abebe kebede		chai		4	401	4001	71499	24/2/11	24/2/11	9	no admission	4	43	3	1	10	100	37.5	42	A C K	1	0	1	0	0	0	0	0	0	0	1	0	0	0	0	0	0		2			2
232	2019-02-25 15:05:57	akebede@clintonhealthaccess.org	2019-01-30	Abebe kebede		chai		4	401	4001	47462	2011-05-04	2011-05-04	9	no admission	3	24	3	2	10	75	35.5	999	A	1	0	0	0	0	0	0	0	0	0	0	0	0	0	0	0	0		2			2
233	2019-02-25 15:09:41	akebede@clintonhealthaccess.org	2019-01-30	Abebe kebede		chai		4	401	4001	71621	13/4/11	13/4/11	9	no admission	1	2	2	2	99	58	36	999	A	1	0	0	0	0	0	0	0	0	0	0	0	0	0	0	0	0		2			2
234	2019-02-25 15:14:17	akebede@clintonhealthaccess.org	2019-01-30	Abebe kebede		chai		4	401	4001	71340	17/4/11	17/4/11	9	no admission	1	2	2	2	5.2	62	35.5	62	A B	1	1	0	0	0	0	0	0	0	0	0	0	0	0	0	0	0		2			2
235	2019-02-25 15:17:45	akebede@clintonhealthaccess.org	2019-01-30	Abebe kebede		chai		4	401	4001	72452	2011-02-04	2011-02-04	9	no admission	1	4	2	1	99	99	99	99	A	1	0	0	0	0	0	0	0	0	0	0	0	0	0	0	0	0		2			2
236	2019-02-25 15:21:39	akebede@clintonhealthaccess.org	2019-01-30	Abebe kebede		chai		4	401	4001	71085	2011-03-02	2011-03-02	9	no admission	3	36	3	1	99	9	9	999	A B	1	1	0	0	0	0	0	0	0	0	0	0	0	0	0	0	0		2			2
237	2019-02-25 15:25:35	akebede@clintonhealthaccess.org	2019-01-30	Abebe kebede		chai		4	401	4001	72381	30/2/11	30/2/11	9	no admission	2	13	3	1	99	9	9	999	A	1	0	0	0	0	0	0	0	0	0	0	0	0	0	0	0	0		2			2
238	2019-02-25 15:33:37	akebede@clintonhealthaccess.org	2019-02-01	Abebe kebede		chai		4	401	4002	20216	2011-01-02	2011-01-02	9	no admission	3	30	3	1	12	80	36	42	A	1	0	0	0	0	0	0	0	0	0	0	0	0	0	0	0	0		2			2
239	2019-02-25 15:46:11	akebede@clintonhealthaccess.org	2019-02-01	Abebe kebede		chai		4	401	4002	18337	2011-02-02	2011-02-02	9	no admission	4	39	3	1	12.5	84	36	42	A	1	0	0	0	0	0	0	0	0	0	0	0	0	0	0	0	0		2			2
240	2019-02-25 15:50:00	akebede@clintonhealthaccess.org	2019-02-01	Abebe kebede		chai		4	401	4002	30279	2011-02-02	2011-02-02	9	no admission	3	24	3	2	11.7	74	36.5	42	A	1	0	0	0	0	0	0	0	0	0	0	0	0	0	0	0	0		2			2
241	2019-02-25 15:54:25	akebede@clintonhealthaccess.org	2019-02-01	Abebe kebede		chai		4	401	4002	37905	2011-05-02	2011-05-02	9	no admission	1	3	2	2	3.3	34	9	56	A	1	0	0	0	0	0	0	0	0	0	0	0	0	0	0	0	0		2			2
242	2019-02-25 15:58:09	akebede@clintonhealthaccess.org	2019-02-01	Abebe kebede		chai		4	401	4002	33767	2011-05-02	2011-05-02	9	no admission	2	12	3	2	8.5	65	36.2	52	A	1	0	0	0	0	0	0	0	0	0	0	0	0	0	0	0	0		2			2
243	2019-02-25 16:03:40	akebede@clintonhealthaccess.org	2019-02-01	Abebe kebede		chai		4	401	4002	30668	2011-09-02	2011-09-02	1		3	30	3	2	12	79	36.5	42	A	1	0	0	0	0	0	0	0	0	0	0	0	0	0	0	0	0		2			2
244	2019-02-25 16:10:35	akebede@clintonhealthaccess.org	2019-02-01	Abebe kebede		chai		4	401	4002	7302	2011-09-02	2011-09-02	9	no admission	2	13	3	1	9.5	73	37	52	A	1	0	0	0	0	0	0	0	0	0	0	0	0	0	0	0	0		2			2
245	2019-02-25 16:15:13	akebede@clintonhealthaccess.org	2019-02-01	Abebe kebede		chai		4	401	4002	35258	2011-09-02	2011-09-02	9	no admission	2	12	3	2	8.7	80	36.5	51	A	1	0	0	0	0	0	0	0	0	0	0	0	0	0	0	0	0		2			2
246	2019-02-25 16:18:51	akebede@clintonhealthaccess.org	2019-02-01	Abebe kebede		chai		4	401	4002	77304	2011-09-02	2011-09-02	9	no admission	5	48	3	1	14	95	36.5	42	A	1	0	0	0	0	0	0	0	0	0	0	0	0	0	0	0	0		2			2
247	2019-02-25 16:22:42	akebede@clintonhealthaccess.org	2019-02-01	Abebe kebede		chai		4	401	4002	32568	2011-09-02	2011-09-02	9	no admission	3	24	3	2	7.5	80	36.5	42	A	1	0	0	0	0	0	0	0	0	0	0	0	0	0	0	0	0		2			2
248	2019-02-25 16:26:19	akebede@clintonhealthaccess.org	2019-02-01	Abebe kebede		chai		4	401	4002	35902	2011-09-02	2011-09-02	9	no admission	1	10	2	1	7	75	36.5	51	A	1	0	0	0	0	0	0	0	0	0	0	0	0	0	0	0	0		2			2
249	2019-02-25 16:30:13	akebede@clintonhealthaccess.org	2019-02-01	Abebe kebede		chai		4	401	4002	33301	2011-09-02	2011-09-02	9	no admission	3	24	3	1	8.7	85	36.5	51	A	1	0	0	0	0	0	0	0	0	0	0	0	0	0	0	0	0		2			2
250	2019-02-25 16:34:18	akebede@clintonhealthaccess.org	2019-02-01	Abebe kebede		chai		4	401	4002	35638	2011-12-02	2011-12-02	9	no admission	1	11	2	1	8.2	69	36.1	51	A	1	0	0	0	0	0	0	0	0	0	0	0	0	0	0	0	0		2			2
251	2019-02-25 16:38:15	akebede@clintonhealthaccess.org	2019-02-01	Abebe kebede		chai		4	401	4002	38408	2011-12-02	2011-12-02	9	no admission	1	3	2	2	4.7	63	36	54	A	1	0	0	0	0	0	0	0	0	0	0	0	0	0	0	0	0		2			2
252	2019-02-25 16:44:45	akebede@clintonhealthaccess.org	2019-02-01	Abebe kebede		chai		4	401	4002	39263	14/2/11	14/2/11	9	no admission	1	7	2	2	6.5	79	36.5	51	A	1	0	0	0	0	0	0	0	0	0	0	0	0	0	0	0	0		2			2
253	2019-02-25 16:49:25	akebede@clintonhealthaccess.org	2019-02-01	Abebe kebede		chai		4	401	4002	39276	15/2/11	15/2/11	9	no admission	2	21	3	2	11.3	76	36.1	44	A	1	0	0	0	0	0	0	0	0	0	0	0	0	0	0	0	0		2			2
254	2019-02-25 16:53:43	akebede@clintonhealthaccess.org	2019-02-01	Abebe kebede		chai		4	401	4002	37734	15/2/11	15/2/11	9	no admission	2	16	3	1	19	71	36	44	A	1	0	0	0	0	0	0	0	0	0	0	0	0	0	0	0	0		2			2
255	2019-02-25 16:57:57	akebede@clintonhealthaccess.org	2019-02-01	Abebe kebede		chai		4	401	4002	14519	15/2/11	15/2/11	9	no admission	5	52	3	2	13.9	96	36.3	42	A	1	0	0	0	0	0	0	0	0	0	0	0	0	0	0	0	0		2			2
256	2019-02-25 17:02:19	akebede@clintonhealthaccess.org	2019-02-01	Abebe kebede		chai		4	401	4002	35868	19/2/11	19/2/11	9	no admission	1	10	2	2	7.6	69	36.3	51	A	1	0	0	0	0	0	0	0	0	0	0	0	0	0	0	0	0		2			2
257	2019-02-25 17:11:07	akebede@clintonhealthaccess.org	2019-02-01	Abebe kebede		chai		4	401	4002	37338	20/2/11	20/2/11	9	no admission	1	6	2	2	6	68	36.5	52	A	1	0	0	0	0	0	0	0	0	0	0	0	0	0	0	0	0		2			2
258	2019-02-25 17:16:02	akebede@clintonhealthaccess.org	2019-02-01	Abebe kebede		chai		4	401	4002	20495	21/2/11	21/2/11	9	no admission	3	32	3	2	13.2	82	36.5	42	A	1	0	0	0	0	0	0	0	0	0	0	0	0	0	0	0	0		2			2
259	2019-02-25 17:21:13	akebede@clintonhealthaccess.org	2019-02-01	Abebe kebede		chai		4	401	4002	39754	22/2/11	22/2/11	9	no admission	2	17	3	1	10.1	72	36.1	42	A	1	0	0	0	0	0	0	0	0	0	0	0	0	0	0	0	0		2			2
260	2019-02-26 09:03:07	akebede@clintonhealthaccess.org	2019-02-01	Abebe kebede		chai		4	401	4002	38254	22/2/11	22/2/11	9	no admission	1	7	2	2	7	62	37.8	56	A	1	0	0	0	0	0	0	0	0	0	0	0	0	0	0	0	0		2			2
261	2019-02-26 09:07:59	akebede@clintonhealthaccess.org	2019-02-01	Abebe kebede		chai		4	401	4002	19306	23/2/11	23/2/11	9	23/2/11	4	36	3	1	13	86	36.1	42	A	1	0	0	0	0	0	0	0	0	0	0	0	0	0	0	0	0		2			2
262	2019-02-26 09:11:04	akebede@clintonhealthaccess.org	2019-02-01	Abebe kebede		chai		4	401	4002	38996	22/2/11	22/2/11	9	no admission	1	6	2	1	6.3	64	36.5	999	A	1	0	0	0	0	0	0	0	0	0	0	0	0	0	0	0	0		2			2
263	2019-02-26 09:12:05	ayaregal@clintonhealthaccess.org	2019-02-27	Tafese Bersisa		CHAI		2	203	2003	5701	23/2/2011EC	23/2/2011EC	7		1	2	2	2	99	9	9	999	E	0	0	0	0	1	0	0	0	0	0	0	0	0	0	0	0	0		2			2
264	2019-02-26 09:12:05	ayaregal@clintonhealthaccess.org	2019-02-27	Tafese Bersisa		CHAI		2	203	2003	9702	17/4/2011ec	17/4/2011ec	7		1	1	1	1	6	9	9	999	A C	1	0	1	0	0	0	0	0	0	0	0	0	0	0	0	0	0		2			2
265	2019-02-26 09:12:06	ayaregal@clintonhealthaccess.org	2019-02-27	Tafese Bersisa		CHAI		2	203	2003	2676	23/1/2011ec	23/1/2011ec	7		2	12	3	1	8	9	9	64	A I K	1	0	0	0	0	0	0	0	1	0	1	0	0	0	0	0	0		2			2
266	2019-02-26 09:12:06	ayaregal@clintonhealthaccess.org	2019-02-27	Tafese Bersisa		CHAI		2	203	2003	4665	16/2/2011ec	16/2/2011ec	7		1	6	2	2	5	9	9	54	A B C	1	1	1	0	0	0	0	0	0	0	0	0	0	0	0	0	0		2			2
267	2019-02-26 09:12:07	ayaregal@clintonhealthaccess.org	2019-01-28	Tafese Bersisa		CHAI		2	203	2003	4506	15/2/2011ec	15/2/2011ec	7		1	7	2	1	7.5	9	9	64	A B D K	1	1	0	1	0	0	0	0	0	0	1	0	0	0	0	0	0		2			2
268	2019-02-26 09:12:07	ayaregal@clintonhealthaccess.org	2019-01-28	Tafese Bersisa		CHAI		2	203	2003	63212	9/2/2011ec	9/2/2011ec	7		1	6	2	1	8	9	9	80	A B H	1	1	0	0	0	0	0	1	0	0	0	0	0	0	0	0	0		2			2
269	2019-02-26 09:12:08	ayaregal@clintonhealthaccess.org	2019-01-28	Tafese Bersisa		CHAI		2	203	2003	4817	19/2/2011ec	19/2/2011ec	7		3	24	3	1	10	9	9	68	A B	1	1	0	0	0	0	0	0	0	0	0	0	0	0	0	0	0		2			2
270	2019-02-26 09:12:08	ayaregal@clintonhealthaccess.org	2019-01-28	Tafese Bersisa		CHAI		2	203	2003	60572	5/3/2011ec	5/3/2011ec	7		1	9	2	1	9	9	9	60	A D G	1	0	0	1	0	0	1	0	0	0	0	0	0	0	0	0	0		2			2
271	2019-02-26 09:12:09	ayaregal@clintonhealthaccess.org	2019-01-28	Tafese Bersisa		CHAI		2	203	2003	6305	5/3/011ec	5/3/2011ec	7		1	7	2	2	7	9	9	80	A B K	1	1	0	0	0	0	0	0	0	0	1	0	0	0	0	0	0		2			2
272	2019-02-26 09:12:09	ayaregal@clintonhealthaccess.org	2019-01-28	Tafese Bersisa		CHAI		2	203	2003	3987	10/3/2011ec	10/3/2011ec	7		1	5	2	1	8.6	9	9	72	A B H	1	1	0	0	0	0	0	1	0	0	0	0	0	0	0	0	0		2			2
273	2019-02-26 09:12:10	ayaregal@clintonhealthaccess.org	2019-01-28	Tafese Bersisa		CHAI		2	203	2003	1733	28/1/2011ec	28/1/2011ec	10		1	2	2	2	6	9	9	62	A B	1	1	0	0	0	0	0	0	0	0	0	0	0	0	0	0	0		2			2
274	2019-02-26 09:12:10	ayaregal@clintonhealthaccess.org	2019-01-28	Tafese Bersisa		CHAI		2	203	2003	522	21/1/2011ec	21/1/2011ec	10		1	5	2	2	7.5	9	9	54	A G	1	0	0	0	0	0	1	0	0	0	0	0	0	0	0	0	0		2			2
275	2019-02-26 09:12:11	ayaregal@clintonhealthaccess.org	2019-01-28	Tafese Bersisa		CHAI		2	203	2003	2400	21/1/2011ec	21/1/2011ec	10		1	4	2	1	7	9	9	60	A D N	1	0	0	1	0	0	0	0	0	0	0	0	0	1	0	0	0		2			2
276	2019-02-26 09:12:12	ayaregal@clintonhealthaccess.org	2019-01-28	Tafese Bersisa		CHAI		2	203	2003	66198	21/1/2011ec	21/1/2011ec	10		1	7	2	2	8.5	9	9	52	A	1	0	0	0	0	0	0	0	0	0	0	0	0	0	0	0	0		2			2
277	2019-02-26 09:12:12	ayaregal@clintonhealthaccess.org	2019-01-28	Tafese Bersisa		CHAI		2	203	2003	2496	22/1/2011ec	22/1/2011ec	10		2	16	3	1	9	9	9	40	A G	1	0	0	0	0	0	1	0	0	0	0	0	0	0	0	0	0		2			2
278	2019-02-26 09:12:13	ayaregal@clintonhealthaccess.org	2019-01-28	Tafese Bersisa		CHAI		2	203	2003	69073	22/1/2011ec	22/1/2011ec	10		1	3	2	1	6.5	9	9	60	A	1	0	0	0	0	0	0	0	0	0	0	0	0	0	0	0	0		2			2
279	2019-02-26 09:12:13	ayaregal@clintonhealthaccess.org	2019-01-28	Tafese Bersisa		CHAI		2	203	2003	2300	18/1/2011ec	18/1/2011ec	10		2	18	3	1	12	9	9	48	A D H	1	0	0	1	0	0	0	1	0	0	0	0	0	0	0	0	0		2			2
280	2019-02-26 09:12:14	ayaregal@clintonhealthaccess.org	2019-01-28	Tafese Bersisa		CHAI		2	203	2003	65002	15/4/2011ec	15/4/2011ec	10		1	7	2	1	7	9	9	999	A D	1	0	0	1	0	0	0	0	0	0	0	0	0	0	0	0	0		2			2
281	2019-02-26 09:12:14	ayaregal@clintonhealthaccess.org	2019-01-28	Tafese Bersisa		CHAI		2	203	2003	50237	21/2/2011ec	21/2/2011ec	10		5	48	3	1	16	9	9	60	A B	1	1	0	0	0	0	0	0	0	0	0	0	0	0	0	0	0		2			2
282	2019-02-26 09:12:15	ayaregal@clintonhealthaccess.org	2019-01-28	Tafese Bersisa		CHAI		2	203	2003	4796	1972/2011ec	19/2/2011ec	10		2	18	3	1	9	9	9	42	A B I	1	1	0	0	0	0	0	0	1	0	0	0	0	0	0	0	0		2			2
283	2019-02-26 09:14:15	akebede@clintonhealthaccess.org	2019-02-01	Abebe kebede		chai		4	401	4002	39376	26/2/11	26/2/11	9	no admission	1	3	2	1	3	62	36.1	56	A	1	0	0	0	0	0	0	0	0	0	0	0	0	0	0	0	0		2			2
284	2019-02-26 09:17:14	akebede@clintonhealthaccess.org	2019-02-01	Abebe kebede		chai		4	401	4002	7101	26/2/11	26/2/11	9	no admission	2	15	3	2	10	71	36.4	42	A	1	0	0	0	0	0	0	0	0	0	0	0	0	0	0	0	0		2			2
285	2019-02-26 09:20:18	akebede@clintonhealthaccess.org	2019-02-01	Abebe kebede		chai		4	401	4002	13773	29/2/11	29/2/11	9	no admission	5	54	3	1	14.3	99	36.1	45	A	1	0	0	0	0	0	0	0	0	0	0	0	0	0	0	0	0		2			2
286	2019-02-26 09:23:14	akebede@clintonhealthaccess.org	2019-02-01	Abebe kebede		chai		4	401	4002	30517	29/2/11	29/2/11	9	no admission	4	39	3	2	12.9	84	36	42	A	1	0	0	0	0	0	0	0	0	0	0	0	0	0	0	0	0		2			2
287	2019-02-26 09:26:51	akebede@clintonhealthaccess.org	2019-02-01	Abebe kebede		chai		4	401	4002	39430	29/2/11	29/2/11	9	no admission	4	39	3	1	12.9	84	36	42	A	1	0	0	0	0	0	0	0	0	0	0	0	0	0	0	0	0		2			2
288	2019-02-26 09:32:05	akebede@clintonhealthaccess.org	2019-02-01	Abebe kebede		chai		4	401	4002	36673	2011-03-03	2011-03-03	7		5	48	3	2	12.5	90	37.5	70	A B K	1	1	0	0	0	0	0	0	0	0	1	0	0	0	0	0	0		2			2
289	2019-02-26 09:36:02	akebede@clintonhealthaccess.org	2019-02-01	Abebe kebede		chai		4	401	4002	33934	2011-03-03	2011-03-03	9	no admission	2	20	3	1	11	78	36.7	51	A	1	0	0	0	0	0	0	0	0	0	0	0	0	0	0	0	0		2			2
290	2019-02-26 09:39:26	akebede@clintonhealthaccess.org	2019-02-01	Abebe kebede		chai		4	401	4002	34684	2011-03-03	2011-03-03	9	no admission	2	17	3	1	10.9	77	36.3	52	A	1	0	0	0	0	0	0	0	0	0	0	0	0	0	0	0	0		2			2
291	2019-02-26 09:44:09	akebede@clintonhealthaccess.org	2019-02-01	Abebe kebede		chai		4	401	4002	39491	2011-04-03	2011-04-03	9	no admission	3	24	3	2	8.5	85	36.5	48	A	1	0	0	0	0	0	0	0	0	0	0	0	0	0	0	0	0		2			2
292	2019-02-26 09:48:38	akebede@clintonhealthaccess.org	2019-02-01	Abebe kebede		chai		4	401	4002	32944	2011-07-03	2011-07-03	9	no admission	3	24	3	1	10.5	87	36.3	44	A	1	0	0	0	0	0	0	0	0	0	0	0	0	0	0	0	0		2			2
293	2019-02-26 09:52:48	akebede@clintonhealthaccess.org	2019-02-01	Abebe kebede		chai		4	401	4002	7325	2011-07-03	2011-07-03	9	no admission	2	15	3	1	9	71	9	44	A	1	0	0	0	0	0	0	0	0	0	0	0	0	0	0	0	0		2			2
294	2019-02-26 09:55:53	akebede@clintonhealthaccess.org	2019-02-01	Abebe kebede		chai		4	401	4002	13500	2011-07-03	2011-07-03	9	no admission	3	24	3	2	8.5	85	9	47	A K	1	0	0	0	0	0	0	0	0	0	1	0	0	0	0	0	0		2			2
295	2019-02-26 10:04:34	akebede@clintonhealthaccess.org	2019-02-01	Abebe kebede		chai		4	401	4002	7570	2011-07-03	2011-07-03	9	no admission	2	14	3	1	8.5	80	37.1	49	A	1	0	0	0	0	0	0	0	0	0	0	0	0	0	0	0	0		2			2
296	2019-02-26 10:08:05	akebede@clintonhealthaccess.org	2019-02-01	Abebe kebede		chai		4	401	4002	37160	2011-10-03	2011-10-03	9	no admission	1	7	2	2	5.6	66	38.5	51	A	1	0	0	0	0	0	0	0	0	0	0	0	0	0	0	0	0		2			2
297	2019-02-26 10:10:48	akebede@clintonhealthaccess.org	2019-02-01	Abebe kebede		chai		4	401	4002	34920	2011-10-03	2011-10-03	9	no admission	2	16	3	1	10	85	36.5	48	A	1	0	0	0	0	0	0	0	0	0	0	0	0	0	0	0	0		2			2
298	2019-02-26 10:15:07	akebede@clintonhealthaccess.org	2019-02-01	Abebe kebede		chai		4	401	4002	17229	13/3/11	13/3/11	7		4	42	3	1	12.5	87	38.8	60	A B K M	1	1	0	0	0	0	0	0	0	0	1	0	1	0	0	0	0		2			2
299	2019-02-26 10:18:06	akebede@clintonhealthaccess.org	2019-02-01	Abebe kebede		chai		4	401	4002	30949	14/3/11	14/3/11	9	no admission	3	27	3	2	12	78	36.4	55	A	1	0	0	0	0	0	0	0	0	0	0	0	0	0	0	0	0		2			2
300	2019-02-26 10:21:16	akebede@clintonhealthaccess.org	2019-02-01	Abebe kebede		chai		4	401	4002	38321	14/3/11	14/3/11	9	no admission	1	5	2	1	6	63	36.1	55	A	1	0	0	0	0	0	0	0	0	0	0	0	0	0	0	0	0		2			2
301	2019-02-26 10:24:03	akebede@clintonhealthaccess.org	2019-02-01	Abebe kebede		chai		4	401	4002	39564	14/3/11	14/3/11	9	no admission	2	18	3	1	11.5	79	36.1	51	A	1	0	0	0	0	0	0	0	0	0	0	0	0	0	0	0	0		2			2
302	2019-02-26 10:26:49	akebede@clintonhealthaccess.org	2019-02-01	Abebe kebede		chai		4	401	4002	36121	14/3/11	14/3/11	9	no admission	1	10	2	1	8.1	69	36.3	52	A	1	0	0	0	0	0	0	0	0	0	0	0	0	0	0	0	0		2			2
303	2019-02-26 10:29:36	akebede@clintonhealthaccess.org	2019-02-01	Abebe kebede		chai		4	401	4002	37666	17/3/11	17/3/11	9	no admission	1	6	2	2	5	64	40.1	55	A	1	0	0	0	0	0	0	0	0	0	0	0	0	0	0	0	0		2			2
304	2019-02-26 10:38:41	akebede@clintonhealthaccess.org	2019-02-01	Abebe kebede		chai		4	401	4002	35868	18/3/11	18/3/11	9	no admission	1	11	2	2	7.6	69	36.5	52	A	1	0	0	0	0	0	0	0	0	0	0	0	0	0	0	0	0		2			2
305	2019-02-26 10:41:30	akebede@clintonhealthaccess.org	2019-02-01	Abebe kebede		chai		4	401	4002	37655	19/3/11	19/3/11	9	no admission	1	6	2	1	6.3	64	36.7	54	A	1	0	0	0	0	0	0	0	0	0	0	0	0	0	0	0	0		2			2
306	2019-02-26 10:44:08	akebede@clintonhealthaccess.org	2019-02-01	Abebe kebede		chai		4	401	4002	36454	19/3//11	19/3/11	9	no admission	1	9	2	1	7.9	63	36.1	52	A	1	0	0	0	0	0	0	0	0	0	0	0	0	0	0	0	0		2			2
307	2019-02-26 10:46:51	akebede@clintonhealthaccess.org	2019-02-01	Abebe kebede		chai		4	401	4002	20205	21/3/11	21/3/11	9	no admission	3	27	3	1	12.9	79	36.1	51	A	1	0	0	0	0	0	0	0	0	0	0	0	0	0	0	0	0		2			2
308	2019-02-26 10:53:38	akebede@clintonhealthaccess.org	2019-02-01	Abebe kebede		chai		4	401	4002	18337	21/3/11	21/3/11	9	no admission	1	10	2	1	8	69	36.8	54	A	1	0	0	0	0	0	0	0	0	0	0	0	0	0	0	0	0		2			2
309	2019-02-26 10:56:20	akebede@clintonhealthaccess.org	2019-02-01	Abebe kebede		chai		4	401	4002	33232	24/3/11	24/3/11	9	no admission	2	23	3	2	10.9	76	36.5	44	A	1	0	0	0	0	0	0	0	0	0	0	0	0	0	0	0	0		2			2
310	2019-02-26 10:57:04	ayaregal@clintonhealthaccess.org	2019-01-28	Tafese Bersisa		CHAI		2	203	2003	4714	19/2/2011ec	19/2/2011ec	10		1	4	2	2	7.5	9	9	46	A B	1	1	0	0	0	0	0	0	0	0	0	0	0	0	0	0	0		2			2
311	2019-02-26 10:57:05	ayaregal@clintonhealthaccess.org	2019-01-28	Tafese Bersisa		CHAI		2	203	2003	4699	19/2/2011ec	19/2/2011ec	10		4	36	3	1	12	9	9	42	A G	1	0	0	0	0	0	1	0	0	0	0	0	0	0	0	0	0		2			2
312	2019-02-26 10:57:05	ayaregal@clintonhealthaccess.org	2019-01-28	Tafese Bersisa		CHAI		2	203	2003	14120	13/2/2011ec	13/2/2011ec	10		1	3	2	2	7.5	9	9	52	A B	1	1	0	0	0	0	0	0	0	0	0	0	0	0	0	0	0		2			2
313	2019-02-26 10:57:06	ayaregal@clintonhealthaccess.org	2019-01-28	Tafese Bersisa		CHAI		2	203	2003	52244	12/2/2011ec	12/2/2011ec	10		2	16	3	1	11	9	9	48	A B G	1	1	0	0	0	0	1	0	0	0	0	0	0	0	0	0	0		2			2
314	2019-02-26 10:57:07	ayaregal@clintonhealthaccess.org	2019-01-28	Tafese Bersisa		CHAI		2	203	2003	4132	12/2/2011ec	12/2/2011ec	10		5	59	3	1	16	9	9	42	A	1	0	0	0	0	0	0	0	0	0	0	0	0	0	0	0	0		2			2
315	2019-02-26 10:57:07	ayaregal@clintonhealthaccess.org	2019-01-28	Tafese Bersisa		CHAI		2	203	2003	4114	12/2/2011ec	12/2/2011ec	10		1	11	2	2	13	9	9	42	A B	1	1	0	0	0	0	0	0	0	0	0	0	0	0	0	0	0		2			2
316	2019-02-26 10:57:08	ayaregal@clintonhealthaccess.org	2019-01-28	Tafese Bersisa		CHAI		2	203	2003	51731	9/6/2011ec	9/6/2011ec	10		1	11	2	1	9.5	9	9	52	A B	1	1	0	0	0	0	0	0	0	0	0	0	0	0	0	0	0		2			2
317	2019-02-26 10:57:08	ayaregal@clintonhealthaccess.org	2019-01-28	Tafese Bersisa		CHAI		2	203	2003	3023	8/2/2011ec	8/2/2011ec	10		1	2	2	1	5.5	9	9	54	A B G	1	1	0	0	0	0	1	0	0	0	0	0	0	0	0	0	0		2			2
318	2019-02-26 10:57:09	ayaregal@clintonhealthaccess.org	2019-01-28	Tafese Bersisa		CHAI		2	203	2003	59947	6/2/2011ec	6/2/2011ec	10		1	8	2	1	8	9	9	60	A B	1	1	0	0	0	0	0	0	0	0	0	0	0	0	0	0	0		2			2
319	2019-02-26 10:57:09	ayaregal@clintonhealthaccess.org	2019-01-28	Tafese Bersisa		CHAI		2	203	2003	3712	2011-06-02	2011-06-02	10		1	7	2	9	7.5	9	9	68	A B G	1	1	0	0	0	0	1	0	0	0	0	0	0	0	0	0	0		2			2
320	2019-02-26 10:57:10	ayaregal@clintonhealthaccess.org	2019-01-28	Tafese Bersisa		CHAI		2	203	2003	3612	6/2/2011ec	6/2/2011ec	10		4	36	3	1	12	9	9	40	A B G	1	1	0	0	0	0	1	0	0	0	0	0	0	0	0	0	0		2			2
321	2019-02-26 10:57:10	ayaregal@clintonhealthaccess.org	2019-01-28	Tafese Bersisa		CHAI		2	203	2003	3569	5/2/2011ec	5/2/2011ec	10		1	8	2	1	8.5	9	9	52	A B	1	1	0	0	0	0	0	0	0	0	0	0	0	0	0	0	0		2			2
322	2019-02-26 10:57:11	ayaregal@clintonhealthaccess.org	2019-01-28	Tafese Bersisa		CHAI		2	203	2003	5755	30/2/2011ec	30/2/2011ec	10		2	10	2	1	10	9	9	44	A B	1	1	0	0	0	0	0	0	0	0	0	0	0	0	0	0	0		2			2
323	2019-02-26 10:57:12	ayaregal@clintonhealthaccess.org	2019-01-28	Tafese Bersisa		CHAI		2	203	2003	5431	29/2/2011Ec	29/2/2011Ec	10		1	3	2	2	7	9	9	75	A B	1	1	0	0	0	0	0	0	0	0	0	0	0	0	0	0	0		2			2
324	2019-02-26 10:57:12	ayaregal@clintonhealthaccess.org	2019-01-28	Tafese Bersisa		CHAI		2	203	2003	5704	29/2/2011Ec	29/2/2011Ec	10		3	27	3	2	11	9	9	40	A B	1	1	0	0	0	0	0	0	0	0	0	0	0	0	0	0	0		2			2
325	2019-02-26 10:57:13	ayaregal@clintonhealthaccess.org	2019-01-28	Tafese Bersisa		CHAI		2	203	2003	5617	28/2/2011Ec	28/2/2011Ec	10		1	5	2	2	7.5	9	9	60	A B G	1	1	0	0	0	0	1	0	0	0	0	0	0	0	0	0	0		2			2
326	2019-02-26 10:57:13	ayaregal@clintonhealthaccess.org	2019-01-28	Tafese Bersisa		CHAI		2	203	2003	5457	27/2/2011Ec	27/2/2011Ec	10		1	3	2	2	6	9	9	72	A B	1	1	0	0	0	0	0	0	0	0	0	0	0	0	0	0	0		2			2
327	2019-02-26 10:57:14	ayaregal@clintonhealthaccess.org	2019-01-28	Tafese Bersisa		CHAI		2	203	2003	5417	26/2/2011Ec	26/2/2011Ec	10		1	9	2	2	9	9	9	52	A B D G	1	1	0	1	0	0	1	0	0	0	0	0	0	0	0	0	0		2			2
328	2019-02-26 10:57:14	ayaregal@clintonhealthaccess.org	2019-01-28	Tafese Bersisa		CHAI		2	203	2003	4382	26/2/2011Ec	26/2/2011Ec	10		2	12	3	2	10.5	9	9	42	A B	1	1	0	0	0	0	0	0	0	0	0	0	0	0	0	0	0		2			2
329	2019-02-26 10:57:15	ayaregal@clintonhealthaccess.org	2019-01-28	Tafese Bersisa		CHAI		2	203	2003	5198	23/2/2011Ec	23/2/2011Ec	10		1	3	2	1	4.5	9	9	60	A B D	1	1	0	1	0	0	0	0	0	0	0	0	0	0	0	0	0		2			2
330	2019-02-26 10:59:08	akebede@clintonhealthaccess.org	2019-02-01	Abebe kebede		chai		4	401	4002	36503	25/3/11	25/3/11	9	no admission	2	13	3	2	8.9	69	36.5	52	A	1	0	0	0	0	0	0	0	0	0	0	0	0	0	0	0	0		2			2
331	2019-02-26 11:03:10	akebede@clintonhealthaccess.org	2019-02-01	Abebe kebede		chai		4	401	4002	33950	25/3/11	25/3/11	9	no admission	3	24	3	2	12.3	75	36.1	52	A	1	0	0	0	0	0	0	0	0	0	0	0	0	0	0	0	0		2			2
332	2019-02-26 11:11:55	akebede@clintonhealthaccess.org	2019-02-01	Abebe kebede		chai		4	401	4002	7924	25/3/11	25/3/11	9	no admission	4	36	3	1	13.5	82	36.1	42	A	1	0	0	0	0	0	0	0	0	0	0	0	0	0	0	0	0		2			2
333	2019-02-26 11:14:34	akebede@clintonhealthaccess.org	2019-02-01	Abebe kebede		chai		4	401	4002	19318	25/3/11	25/3/11	9	no admission	4	36	3	1	12.9	84	36.2	44	A	1	0	0	0	0	0	0	0	0	0	0	0	0	0	0	0	0		2			2
334	2019-02-26 11:17:17	akebede@clintonhealthaccess.org	2019-02-01	Abebe kebede		chai		4	401	4002	38104	25/3/11	25/3/11	9	no admission	1	4	2	1	6.5	79	36.5	52	A	1	0	0	0	0	0	0	0	0	0	0	0	0	0	0	0	0		2			2
335	2019-02-26 11:20:09	akebede@clintonhealthaccess.org	2019-02-01	Abebe kebede		chai		4	401	4002	38996	25/3/11	25/3/11	9	no admission	1	7	2	1	8	79	36.5	51	A	1	0	0	0	0	0	0	0	0	0	0	0	0	0	0	0	0		2			2
336	2019-02-26 11:23:09	akebede@clintonhealthaccess.org	2019-02-01	Abebe kebede		chai		4	401	4002	35623	26/3/11	26/3/11	9	no admission	2	12	3	2	10	80	36.2	46	A B	1	1	0	0	0	0	0	0	0	0	0	0	0	0	0	0	0		2			2
337	2019-02-26 11:26:06	akebede@clintonhealthaccess.org	2019-02-01	Abebe kebede		chai		4	401	4002	35472	26/3/11	26/3/11	9	no admission	2	13	3	1	8.4	69	37.3	52	A	1	0	0	0	0	0	0	0	0	0	0	0	0	0	0	0	0		2			2
338	2019-02-26 11:29:02	akebede@clintonhealthaccess.org	2019-02-01	Abebe kebede		chai		4	401	4002	18391	28/3/11	28/3/11	9	no admission	4	39	3	1	13.2	84	36.2	43	A B	1	1	0	0	0	0	0	0	0	0	0	0	0	0	0	0	0		2			2
339	2019-02-26 11:32:09	akebede@clintonhealthaccess.org	2019-02-01	Abebe kebede		chai		4	401	4002	39754	2011-01-04	2011-01-04	9	no admission	2	18	3	1	11	73	36.2	46	A K	1	0	0	0	0	0	0	0	0	0	1	0	0	0	0	0	0		2			2
340	2019-02-26 11:34:47	akebede@clintonhealthaccess.org	2019-02-01	Abebe kebede		chai		4	401	4002	37092	2011-01-04	2011-01-04	9	no admission	1	7	2	2	5	68	38	53	A	1	0	0	0	0	0	0	0	0	0	0	0	0	0	0	0	0		2			2
341	2019-02-26 11:40:09	akebede@clintonhealthaccess.org	2019-02-01	Abebe kebede		chai		4	401	4002	20850	2011-03-04	2011-03-04	9	no admission	3	32	3	1	12	79	36.9	999	A B	1	1	0	0	0	0	0	0	0	0	0	0	0	0	0	0	0		2			2
342	2019-02-26 11:42:55	akebede@clintonhealthaccess.org	2019-02-01	Abebe kebede		chai		4	401	4002	18154	2011-03-04	2011-03-04	9	no admission	5	54	3	2	14.3	97	36	42	A B	1	1	0	0	0	0	0	0	0	0	0	0	0	0	0	0	0		2			2
343	2019-02-26 11:45:44	akebede@clintonhealthaccess.org	2019-02-01	Abebe kebede		chai		4	401	4002	34667	2011-03-04	2011-03-04	9	no admission	2	18	3	1	10.8	66	37.3	42	A	1	0	0	0	0	0	0	0	0	0	0	0	0	0	0	0	0		2			2
344	2019-02-26 11:48:23	akebede@clintonhealthaccess.org	2019-02-01	Abebe kebede		chai		4	401	4002	39659	2011-03-04	2011-03-04	9	no admission	1	3	2	2	5	58	36.4	62	A B	1	1	0	0	0	0	0	0	0	0	0	0	0	0	0	0	0		2			2
345	2019-02-26 11:51:49	akebede@clintonhealthaccess.org	2019-02-01	Abebe kebede		chai		4	401	4002	38400	2011-03-04	2011-03-04	9	no admission	1	4	2	1	5.4	58	36	54	A B	1	1	0	0	0	0	0	0	0	0	0	0	0	0	0	0	0		2			2
346	2019-02-26 11:55:57	akebede@clintonhealthaccess.org	2019-02-01	Abebe kebede		chai		4	401	4002	35901	2011-03-04	2011-03-04	9	no admission	1	11	2	1	7.8	64	36.5	52	A B	1	1	0	0	0	0	0	0	0	0	0	0	0	0	0	0	0		2			2
347	2019-02-26 12:00:05	akebede@clintonhealthaccess.org	2019-02-01	Abebe kebede		chai		4	401	4002	37484	2011-03-04	2011-03-04	9	no admission	1	7	2	1	6.8	63	36	54	A	1	0	0	0	0	0	0	0	0	0	0	0	0	0	0	0	0		2			2
348	2019-02-26 14:28:24	ayaregal@clintonhealthaccess.org	2019-01-28	Tafese Bersisa		CHAI		2	203	2003	2803	23/2/2011Ec	23/2/2011Ec	10		5	59	3	1	15	9	9	40	A B G	1	1	0	0	0	0	1	0	0	0	0	0	0	0	0	0	0		2			2
349	2019-02-26 14:28:25	ayaregal@clintonhealthaccess.org	2019-01-28	Tafese Bersisa		CHAI		2	203	2003	67397	3/3/2011Ec	3/3/2011Ec	10		2	21	3	1	13	9	9	44	A B	1	1	0	0	0	0	0	0	0	0	0	0	0	0	0	0	0		2			2
350	2019-02-26 14:28:25	ayaregal@clintonhealthaccess.org	2019-01-28	Tafese Bersisa		CHAI		2	203	2003	5925	3/3/2011Ec	3/3/2011Ec	10		1	5	2	1	7.5	9	9	54	A B	1	1	0	0	0	0	0	0	0	0	0	0	0	0	0	0	0		2			2
351	2019-02-26 14:28:26	ayaregal@clintonhealthaccess.org	2019-01-28	Tafese Bersisa		CHAI		2	203	2003	69507	4/3/2011Ec	4/3/2011Ec	10		3	24	3	2	12	9	9	40	A B	1	1	0	0	0	0	0	0	0	0	0	0	0	0	0	0	0		2			2
352	2019-02-26 14:28:26	ayaregal@clintonhealthaccess.org	2019-01-28	Tafese Bersisa		CHAI		2	203	2003	6140	4/3/2011Ec	4/3/2011Ec	10		3	30	3	2	12	9	9	44	A B D	1	1	0	1	0	0	0	0	0	0	0	0	0	0	0	0	0		2			2
353	2019-02-26 14:28:27	ayaregal@clintonhealthaccess.org	2019-01-28	Tafese Bersisa		CHAI		2	203	2003	6152	5/3/2011Ec	5/3/2011Ec	10		3	30	3	1	12	9	9	44	A B G	1	1	0	0	0	0	1	0	0	0	0	0	0	0	0	0	0		2			2
354	2019-02-26 14:28:27	ayaregal@clintonhealthaccess.org	2019-01-28	Tafese Bersisa		CHAI		2	203	2003	6201	5/3/2011Ec	5/3/2011Ec	10		4	40	3	1	99	9	9	44	A B G	1	1	0	0	0	0	1	0	0	0	0	0	0	0	0	0	0		2			2
355	2019-02-26 14:28:28	ayaregal@clintonhealthaccess.org	2019-01-28	Tafese Bersisa		CHAI		2	203	2003	6361	6/3/2011Ec	6/3/2011Ec	10		2	19	3	2	10	9	9	42	A B H	1	1	0	0	0	0	0	1	0	0	0	0	0	0	0	0	0		2			2
356	2019-02-26 14:28:29	ayaregal@clintonhealthaccess.org	2019-01-28	Tafese Bersisa		CHAI		2	203	2003	6428	7/2/2011Ec	7/2/2011Ec	10		1	8	2	1	7	9	9	54	A B	1	1	0	0	0	0	0	0	0	0	0	0	0	0	0	0	0		2			2
357	2019-02-26 14:28:29	ayaregal@clintonhealthaccess.org	2019-01-28	Tafese Bersisa		CHAI		2	203	2003	6442	7/2/2011Ec	7/2/2011Ec	10		4	36	3	2	15	9	9	44	A B G	1	1	0	0	0	0	1	0	0	0	0	0	0	0	0	0	0		2			2
358	2019-02-26 14:28:30	ayaregal@clintonhealthaccess.org	2019-01-28	Tafese Bersisa		CHAI		2	203	2003	6531	10/3/2011Ec	10/3/2011Ec	10		1	6	2	1	7	9	9	54	A B G	1	1	0	0	0	0	1	0	0	0	0	0	0	0	0	0	0		2			2
359	2019-02-26 14:28:30	ayaregal@clintonhealthaccess.org	2019-01-28	Tafese Bersisa		CHAI		2	203	2003	5417	10/3/2011Ec	10/3/2011Ec	10		1	9	2	2	8.5	9	9	54	A B G	1	1	0	0	0	0	1	0	0	0	0	0	0	0	0	0	0		2			2
360	2019-02-26 14:28:31	ayaregal@clintonhealthaccess.org	2019-01-28	Tafese Bersisa		CHAI		2	203	2003	6585	1273/2011Ec	12/3/2011Ec	10		1	6	2	1	8.5	9	9	56	A B	1	1	0	0	0	0	0	0	0	0	0	0	0	0	0	0	0		2			2
361	2019-02-26 14:28:31	ayaregal@clintonhealthaccess.org	2019-01-28	Tafese Bersisa		CHAI		2	203	2003	6650	12/3/2011Ec	12/3/2011Ec	10		1	6	2	1	7.5	9	9	60	A B D G	1	1	0	1	0	0	1	0	0	0	0	0	0	0	0	0	0		2			2
362	2019-02-26 14:28:32	ayaregal@clintonhealthaccess.org	2019-01-28	Tafese Bersisa		CHAI		2	203	2003	6688	12/3/2011Ec	12/3/2011Ec	10		4	36	3	1	12	9	9	56	A B G	1	1	0	0	0	0	1	0	0	0	0	0	0	0	0	0	0		2			2
363	2019-02-26 14:28:33	ayaregal@clintonhealthaccess.org	2019-01-28	Tafese Bersisa		CHAI		2	203	2003	73019	13/3/2011Ec	13/3/2011Ec	10		1	6	2	2	7	9	9	52	A B G	1	1	0	0	0	0	1	0	0	0	0	0	0	0	0	0	0		2			2
364	2019-02-26 14:28:33	ayaregal@clintonhealthaccess.org	2019-01-28	Tafese Bersisa		CHAI		2	203	2003	6809	13/3/2011Ec	13/3/2011Ec	10		2	20	3	2	12	9	9	44	A B G	1	1	0	0	0	0	1	0	0	0	0	0	0	0	0	0	0		2			2
365	2019-02-26 14:28:34	ayaregal@clintonhealthaccess.org	2019-01-28	Tafese Bersisa		CHAI		2	203	2003	6991	17/3/2011Ec	17/3/2011Ec	10		1	2	2	2	4.5	9	9	64	A B D E	1	1	0	1	1	0	0	0	0	0	0	0	0	0	0	0	0		2			2
366	2019-02-26 14:28:35	ayaregal@clintonhealthaccess.org	2019-01-28	Tafese Bersisa		CHAI		2	203	2003	7044	17/3/2011Ec	17/3/2011Ec	10		2	12	3	1	10	9	9	60	A B D	1	1	0	1	0	0	0	0	0	0	0	0	0	0	0	0	0		2			2
367	2019-02-26 14:28:35	ayaregal@clintonhealthaccess.org	2019-01-28	Tafese Bersisa		CHAI		2	203	2003	4307	17/3/2011Ec	17/3/2011Ec	10		2	18	3	1	10	9	9	60	A B D K	1	1	0	1	0	0	0	0	0	0	1	0	0	0	0	0	0		2			2
368	2019-02-26 14:38:09	akebede@clintonhealthaccess.org	2019-02-01	Abebe kebede		chai		4	401	4002	17205	2011-04-04	2011-04-04	9	no admission	4	48	3	2	14	96	36.9	42	A	1	0	0	0	0	0	0	0	0	0	0	0	0	0	0	0	0		2			2
369	2019-02-26 14:41:40	akebede@clintonhealthaccess.org	2019-02-01	Abebe kebede		chai		4	401	4002	30808	2011-05-04	2011-05-04	9	no admission	3	30	3	2	11	79	36.2	44	A	1	0	0	0	0	0	0	0	0	0	0	0	0	0	0	0	0		2			2
370	2019-02-26 14:53:03	akebede@clintonhealthaccess.org	2019-02-01	Abebe kebede		chai		4	401	4002	17205	2011-04-04	2011-04-04	9	no admission	5	48	3	2	14	96	36.9	42	A	1	0	0	0	0	0	0	0	0	0	0	0	0	0	0	0	0		2			2
371	2019-02-26 16:02:07	ayaregal@clintonhealthaccess.org	2019-01-28	Tafese Bersisa		CHAI		2	203	2003	7068	17/3/2011Ec	17/3/2011Ec	10		2	14	3	1	8.5	9	9	60	A B D	1	1	0	1	0	0	0	0	0	0	0	0	0	0	0	0	0		2			2
372	2019-02-26 16:02:07	ayaregal@clintonhealthaccess.org	2019-01-28	Tafese Bersisa		CHAI		2	203	2003	7080	17/3/2011Ec	17/3/2011Ec	10		1	6	2	2	99	9	9	999	A G	1	0	0	0	0	0	1	0	0	0	0	0	0	0	0	0	0		2			2
373	2019-02-26 16:02:08	ayaregal@clintonhealthaccess.org	2019-01-28	Tafese Bersisa		CHAI		2	203	2003	60146	18/3/2011Ec	18/3/2011Ec	10		2	15	3	2	9.5	9	9	58	A B G	1	1	0	0	0	0	1	0	0	0	0	0	0	0	0	0	0		2			2
374	2019-02-26 16:02:08	ayaregal@clintonhealthaccess.org	2019-01-28	Tafese Bersisa		CHAI		2	203	2003	6841	20/3/2011Ec	20/3/2011Ec	10		1	8	2	1	99	9	9	54	A B G	1	1	0	0	0	0	1	0	0	0	0	0	0	0	0	0	0		2			2
375	2019-02-26 16:02:09	ayaregal@clintonhealthaccess.org	2019-01-28	Tafese Bersisa		CHAI		2	203	2003	1355	20/3/2011Ec	20/3/2011Ec	10		1	4	2	1	6	9	9	52	A B	1	1	0	0	0	0	0	0	0	0	0	0	0	0	0	0	0		2			2
376	2019-02-26 16:02:09	ayaregal@clintonhealthaccess.org	2019-01-28	Tafese Bersisa		CHAI		2	203	2003	7301	19/3/2011Ec	19/3/2011Ec	10		1	4	2	1	5	9	9	56	A B D G	1	1	0	1	0	0	1	0	0	0	0	0	0	0	0	0	0		2			2
377	2019-02-26 16:02:10	ayaregal@clintonhealthaccess.org	2019-01-28	Tafese Bersisa		CHAI		2	203	2003	7297	19/3/2011Ec	19/3/2011Ec	10		4	32	3	2	12	9	9	40	A B D G	1	1	0	1	0	0	1	0	0	0	0	0	0	0	0	0	0		2			2
378	2019-02-26 16:02:11	ayaregal@clintonhealthaccess.org	2019-01-28	Tafese Bersisa		CHAI		2	203	2003	6514	19/3/2011Ec	19/3/2011Ec	10		3	28	3	1	11	9	9	44	A B D G	1	1	0	1	0	0	1	0	0	0	0	0	0	0	0	0	0		2			2
379	2019-02-26 16:02:11	ayaregal@clintonhealthaccess.org	2019-01-28	Tafese Bersisa		CHAI		2	203	2003	7849	26/3/2011Ec	26/3/2011Ec	10		1	4	2	2	5.5	9	9	52	A B G	1	1	0	0	0	0	1	0	0	0	0	0	0	0	0	0	0		2			2
380	2019-02-26 16:02:12	ayaregal@clintonhealthaccess.org	2019-01-28	Tafese Bersisa		CHAI		2	203	2003	7794	26/3/2011Ec	26/3/2011Ec	10		2	14	3	1	8	9	9	40	A G	1	0	0	0	0	0	1	0	0	0	0	0	0	0	0	0	0		2			2
381	2019-02-26 16:02:12	ayaregal@clintonhealthaccess.org	2019-01-28	Tafese Bersisa		CHAI		2	203	2003	5156	26/3/2011Ec	26/3/2011Ec	10		1	3	2	1	7	9	9	50	A B G	1	1	0	0	0	0	1	0	0	0	0	0	0	0	0	0	0		2			2
382	2019-02-26 16:02:13	ayaregal@clintonhealthaccess.org	2019-01-28	Tafese Bersisa		CHAI		2	203	2003	4099	25/3/2011Ec	25/3/2011Ec	10		4	36	3	2	99	9	9	40	A B G	1	1	0	0	0	0	1	0	0	0	0	0	0	0	0	0	0		2			2
383	2019-02-26 16:02:13	ayaregal@clintonhealthaccess.org	2019-01-28	Tafese Bersisa		CHAI		2	203	2003	43642	25/3/2011Ec	25/3/2011Ec	10		1	9	2	2	8	9	9	56	A B G I	1	1	0	0	0	0	1	0	1	0	0	0	0	0	0	0	0		2			2
384	2019-02-26 16:02:14	ayaregal@clintonhealthaccess.org	2019-01-28	Tafese Bersisa		CHAI		2	203	2003	7625	24/3/2011Ec	24/3/2011Ec	10		2	12	3	2	8.5	9	9	44	A B	1	1	0	0	0	0	0	0	0	0	0	0	0	0	0	0	0		2			2
385	2019-02-26 16:02:15	ayaregal@clintonhealthaccess.org	2019-01-28	Tafese Bersisa		CHAI		2	203	2003	47476	21/3/2011Ec	21/3/2011Ec	10		2	15	3	1	9	9	9	46	A B D	1	1	0	1	0	0	0	0	0	0	0	0	0	0	0	0	0		2			2
386	2019-02-26 16:02:15	ayaregal@clintonhealthaccess.org	2019-01-28	Tafese Bersisa		CHAI		2	203	2003	7471	21/3/2011Ec	21/3/2011Ec	10		1	6	2	1	9	9	9	64	A B G	1	1	0	0	0	0	1	0	0	0	0	0	0	0	0	0	0		2			2
387	2019-02-26 16:02:16	ayaregal@clintonhealthaccess.org	2019-01-28	Tafese Bersisa		CHAI		2	203	2003	64040	20/3/2011Ec	20/3/2011Ec	10		2	10	2	1	10	9	9	42	A B D	1	1	0	1	0	0	0	0	0	0	0	0	0	0	0	0	0		2			2
388	2019-02-26 16:02:16	ayaregal@clintonhealthaccess.org	2019-01-28	Tafese Bersisa		CHAI		2	203	2003	59490	20/3/2011Ec	20/3/2011Ec	10		1	10	2	1	9.5	9	9	54	A B	1	1	0	0	0	0	0	0	0	0	0	0	0	0	0	0	0		2			2
389	2019-02-26 16:02:17	ayaregal@clintonhealthaccess.org	2019-01-28	Tafese Bersisa		CHAI		2	203	2003	3962	9/2/2011Ec	9/2/2011Ec	10		1	4	2	1	8	9	9	64	A B G	1	1	0	0	0	0	1	0	0	0	0	0	0	0	0	0	0		2			2
390	2019-02-26 16:02:17	ayaregal@clintonhealthaccess.org	2019-01-28	Tafese Bersisa		CHAI		2	203	2003	8249	10/4/2011Ec	10/4/2011Ec	10		3	30	3	2	13	9	9	42	A B G	1	1	0	0	0	0	1	0	0	0	0	0	0	0	0	0	0		2			2
391	2019-02-26 17:32:02	ayaregal@clintonhealthaccess.org	2019-01-28	Tafese Bersisa		CHAI		2	203	2003	9213	11/4/2011Ec	11/4/2011Ec	10		1	5	2	2	8	9	9	999	A X	1	0	0	0	0	0	0	0	0	0	0	0	0	0	0	1	0	Eye discharge	2			2
392	2019-02-26 17:32:03	ayaregal@clintonhealthaccess.org	2019-01-28	Tafese Bersisa		CHAI		2	203	2003	9005	10/4/2011Ec	10/4/2011Ec	10		1	6	2	1	9.5	9	9	60	A G	1	0	0	0	0	0	1	0	0	0	0	0	0	0	0	0	0		2			2
393	2019-02-26 17:32:04	ayaregal@clintonhealthaccess.org	2019-01-28	Tafese Bersisa		CHAI		2	203	2003	8859	9/4/2011Ec	9/4/2011Ec	10		3	29	3	2	12	9	9	40	A B D	1	1	0	1	0	0	0	0	0	0	0	0	0	0	0	0	0		2			2
394	2019-02-26 17:32:04	ayaregal@clintonhealthaccess.org	2019-01-28	Tafese Bersisa		CHAI		2	203	2003	8837	9/4/2011Ec	9/4/2011Ec	10		5	48	3	2	16	9	9	40	A B G	1	1	0	0	0	0	1	0	0	0	0	0	0	0	0	0	0		2			2
395	2019-02-26 17:32:05	ayaregal@clintonhealthaccess.org	2019-01-28	Tafese Bersisa		CHAI		2	203	2003	8741	8/4/2011Ec	8/4/2011Ec	10		1	4	2	1	8	9	9	64	A B D G	1	1	0	1	0	0	1	0	0	0	0	0	0	0	0	0	0		2			2
396	2019-02-26 17:32:05	ayaregal@clintonhealthaccess.org	2019-01-28	Tafese Bersisa		CHAI		2	203	2003	8742	8/4/2011Ec	8/4/2011Ec	10		1	7	2	2	6	9	9	60	A B G	1	1	0	0	0	0	1	0	0	0	0	0	0	0	0	0	0		2			2
397	2019-02-26 17:32:06	ayaregal@clintonhealthaccess.org	2019-01-28	Tafese Bersisa		CHAI		2	203	2003	8734	8/4/2011Ec	8/4/2011Ec	10		2	21	3	1	12	9	9	40	A B G	1	1	0	0	0	0	1	0	0	0	0	0	0	0	0	0	0		2			2
398	2019-02-26 17:32:06	ayaregal@clintonhealthaccess.org	2019-01-28	Tafese Bersisa		CHAI		2	203	2003	8220	5/4/2011Ec	5/4/2011Ec	10		2	12	3	1	8.5	9	9	42	A B	1	1	0	0	0	0	0	0	0	0	0	0	0	0	0	0	0		2			2
399	2019-02-26 17:32:07	ayaregal@clintonhealthaccess.org	2019-01-28	Tafese Bersisa		CHAI		2	203	2003	8603	5/4/2011Ec	5/4/2011Ec	10		2	18	3	1	8	9	9	40	A B D	1	1	0	1	0	0	0	0	0	0	0	0	0	0	0	0	0		2			2
400	2019-02-26 17:32:07	ayaregal@clintonhealthaccess.org	2019-01-28	Tafese Bersisa		CHAI		2	203	2003	8563	4/4/2011Ec	4/4/2011Ec	10		2	15	3	1	15	9	9	40	A B G	1	1	0	0	0	0	1	0	0	0	0	0	0	0	0	0	0		2			2
401	2019-02-26 17:32:08	ayaregal@clintonhealthaccess.org	2019-01-28	Tafese Bersisa		CHAI		2	203	2003	63562	4/4/2011Ec	4/4/2011Ec	10		1	9	2	1	7	9	9	60	A B	1	1	0	0	0	0	0	0	0	0	0	0	0	0	0	0	0		2			2
402	2019-02-26 17:32:09	ayaregal@clintonhealthaccess.org	2019-01-28	Tafese Bersisa		CHAI		2	203	2003	8544	4/4/2011Ec	4/4/2011Ec	10		1	3	2	2	7	9	9	60	A B D	1	1	0	1	0	0	0	0	0	0	0	0	0	0	0	0	0		2			2
403	2019-02-26 17:32:10	ayaregal@clintonhealthaccess.org	2019-01-28	Tafese Bersisa		CHAI		2	203	2003	2266	2/4/2011Ec	2/4/2011Ec	10		1	11	2	1	10	9	9	64	A B D	1	1	0	1	0	0	0	0	0	0	0	0	0	0	0	0	0		2			2
404	2019-02-26 17:32:11	ayaregal@clintonhealthaccess.org	2019-01-28	Tafese Bersisa		CHAI		2	203	2003	8112	1/4/2011Ec	1/4/2011Ec	10		2	12	3	1	8.5	9	9	48	A B D G	1	1	0	1	0	0	1	0	0	0	0	0	0	0	0	0	0		2			2
405	2019-02-26 17:32:12	ayaregal@clintonhealthaccess.org	2019-01-28	Tafese Bersisa		CHAI		2	203	2003	23212	27/3/2011Ec	27/3/2011Ec	10		1	7	2	1	9.5	9	9	60	A B	1	1	0	0	0	0	0	0	0	0	0	0	0	0	0	0	0		2			2
406	2019-02-26 17:32:13	ayaregal@clintonhealthaccess.org	2019-01-28	Tafese Bersisa		CHAI		2	203	2003	3178	30/1/2011Ec	30/1/2011Ec	10		4	12	3	2	12	9	9	60	A	1	0	0	0	0	0	0	0	0	0	0	0	0	0	0	0	0		2			2
407	2019-02-26 17:32:13	ayaregal@clintonhealthaccess.org	2019-01-28	Tafese Bersisa		CHAI		2	203	2003	3301	1/2/2011Ec	1/2/2011Ec	10		1	2	2	2	5.5	9	9	60	A B D K	1	1	0	1	0	0	0	0	0	0	1	0	0	0	0	0	0		2			2
408	2019-02-26 17:32:14	ayaregal@clintonhealthaccess.org	2019-01-28	Tafese Bersisa		CHAI		2	203	2003	3090	29/1/2011Ec	29/1/2011Ec	10		2	19	3	1	9	9	9	42	A	1	0	0	0	0	0	0	0	0	0	0	0	0	0	0	0	0		2			2
409	2019-02-26 17:32:14	ayaregal@clintonhealthaccess.org	2019-01-28	Tafese Bersisa		CHAI		2	203	2003	3040	29/1/2011Ec	29/1/2011Ec	10		2	12	3	1	10	9	9	42	A G	1	0	0	0	0	0	1	0	0	0	0	0	0	0	0	0	0		2			2
410	2019-02-26 17:32:15	ayaregal@clintonhealthaccess.org	2019-01-28	Tafese Bersisa		CHAI		2	203	2003	72830	9/3/2011Ec	9/3/2011Ec	7		1	0	1	1	2.5	9	9	999	Y	0	0	0	0	0	0	0	0	0	0	0	0	0	0	0	0	1		2			2
411	2019-02-26 17:32:16	ayaregal@clintonhealthaccess.org	2019-01-28	Tafese Bersisa		CHAI		2	203	2003	57771	1/2/2011Ec	1/2/2011Ec	7		1	0	1	2	2.5	9	9	999	Y	0	0	0	0	0	0	0	0	0	0	0	0	0	0	0	0	1		2			2
412	2019-02-26 17:32:17	ayaregal@clintonhealthaccess.org	2019-01-28	Tafese Bersisa		CHAI		2	203	2003	50566	27/2/2011Ec	27/2/2011Ec	7		1	0	1	2	3	9	9	999	Y	0	0	0	0	0	0	0	0	0	0	0	0	0	0	0	0	1		2			2
413	2019-02-26 17:32:17	ayaregal@clintonhealthaccess.org	2019-01-28	Tafese Bersisa		CHAI		2	203	2003	5517	23/3/2011Ec	23/3/2011Ec	7		1	0	1	1	3	9	9	999	Y	0	0	0	0	0	0	0	0	0	0	0	0	0	0	0	0	1		2			2
414	2019-02-26 20:41:43	ttumbule@clintonhealthaccess.org	2019-01-30	Tegegn chote		CHAI		3	302	3003	06188/11	18/4/11	9	10		3	28	3	1	17	89	37.5	44	A B C D	1	1	1	1	0	0	0	0	0	0	0	0	0	0	0	0	0		2			2
415	2019-02-26 20:45:20	ttumbule@clintonhealthaccess.org	2019-01-30	Tegegn Chote		CHAI		3	302	3003	06084/11	16/4/11	9	10		1	6	2	1	7.5	60	37.6	50	A B	1	1	0	0	0	0	0	0	0	0	0	0	0	0	0	0	0		2			2
416	2019-02-26 20:49:57	ttumbule@clintonhealthaccess.org	2019-01-30	Tegegn Chote		CHAI		3	302	3003	0602/11	16/4/11	9	10		4	46	3	1	17	97	35.6	48	A B E	1	1	0	0	1	0	0	0	0	0	0	0	0	0	0	0	0		2			2
417	2019-02-26 20:52:33	ttumbule@clintonhealthaccess.org	2019-01-30	Tegegn Chote		CHAI		3	302	3003	05941/11	15/4/11	9	10		1	6	2	1	7	60	35	57	A B	1	1	0	0	0	0	0	0	0	0	0	0	0	0	0	0	0		2			2
418	2019-02-26 20:55:12	ttumbule@clintonhealthaccess.org	2019-01-30	Tegegn Chote		CHAI		3	302	3003	05935/11	15/4/11	9	10		4	36	3	1	13	88	36.6	46	A C G	1	0	1	0	0	0	1	0	0	0	0	0	0	0	0	0	0		2			2
419	2019-02-26 20:58:09	ttumbule@clintonhealthaccess.org	2019-01-30	Tegegn Chote		CHAI		3	302	3003	05939/11	15/4/11	9	10		1	10	2	1	7.7	60	35.3	63	A B	1	1	0	0	0	0	0	0	0	0	0	0	0	0	0	0	0		2			2
420	2019-02-26 21:01:23	ttumbule@clintonhealthaccess.org	2019-01-30	Tegegn Chote		CHAI		3	302	3003	05832/11	2011-12-04	9	10		5	48	3	2	16	98	37.4	45	A B G	1	1	0	0	0	0	1	0	0	0	0	0	0	0	0	0	0		2			2
421	2019-02-26 21:04:07	ttumbule@clintonhealthaccess.org	2019-01-30	Tegegn choet		CHAI		3	302	3003	03664/11	2011-12-04	9	10		5	48	3	1	15	99	37	45	A B G	1	1	0	0	0	0	1	0	0	0	0	0	0	0	0	0	0		2			2
422	2019-02-26 21:07:07	ttumbule@clintonhealthaccess.org	2019-01-30	Tegegn Chote		CHAI		3	302	3003	03629/11	23/4/11	9	10		2	15	3	2	10	70	36.4	40	A F N	1	0	0	0	0	1	0	0	0	0	0	0	0	1	0	0	0		2			2
423	2019-02-26 21:09:40	ttumbule@clintonhealthaccess.org	2019-01-30	Tegegn chote		CHAI		3	302	3003	06417/11	23/4/11	9	10		2	16	3	2	10	69	35.5	44	A B	1	1	0	0	0	0	0	0	0	0	0	0	0	0	0	0	0		2			2
424	2019-02-26 21:12:48	ttumbule@clintonhealthaccess.org	2019-01-30	Tegegn Chote		CHAI		3	302	3003	06377/11	19/4/11	9	10		1	6	2	1	6.5	59	36.4	64	A B	1	1	0	0	0	0	0	0	0	0	0	0	0	0	0	0	0		2			2
425	2019-02-26 21:15:38	ttumbule@clintonhealthaccess.org	2019-01-30	Tegegn Chote		CHAI		3	302	3003	06359/11	19/4/11	9	10		1	6	2	1	7.2	55	36.2	63	A B N	1	1	0	0	0	0	0	0	0	0	0	0	0	1	0	0	0		2			2
426	2019-02-26 21:18:20	ttumbule@clintonhealthaccess.org	2019-01-30	Tegegn Chote		CHAI		3	302	3003	06261/11	19/4/11	9	10		1	5	2	2	6.7	60	37	99	A D	1	0	0	1	0	0	0	0	0	0	0	0	0	0	0	0	0		2			2
427	2019-02-26 21:21:08	ttumbule@clintonhealthaccess.org	2019-01-30	Tegegn Chote		CHAI		3	302	3003	06266/11	19/4/11	9	10		3	28	3	1	13	87	37	40	A B G	1	1	0	0	0	0	1	0	0	0	0	0	0	0	0	0	0		2			2
428	2019-02-26 21:24:07	ttumbule@clintonhealthaccess.org	2019-01-30	Tegegn chote		CHAI		3	302	3003	06210/11	19/4/11	9	10		2	12	3	2	10.5	68	37.5	48	A B G	1	1	0	0	0	0	1	0	0	0	0	0	0	0	0	0	0		2			2
429	2019-02-26 21:32:42	ttumbule@clintonhealthaccess.org	2019-01-30	Tegegn Chote		CHAI		3	302	3003	018252/10	19/4/11	9	10		4	38	3	1	15	87	37.5	44	A B G	1	1	0	0	0	0	1	0	0	0	0	0	0	0	0	0	0		2			2
430	2019-02-27 09:07:02	ayaregal@clintonhealthaccess.org	2019-01-29	Tafese		CHAI		2	201	2001	90766	24/3/11Ec	24/3/2011Ec	10		2	12	3	1	8	9	9	999	A C	1	0	1	0	0	0	0	0	0	0	0	0	0	0	0	0	0		2			2
431	2019-02-27 09:07:02	ayaregal@clintonhealthaccess.org	2019-01-29	Tafese		CHAI		2	201	2001	91554	2/4/2011Ec	2/4/2011Ec	10		2	9	2	1	99	9	9	63	A C	1	0	1	0	0	0	0	0	0	0	0	0	0	0	0	0	0		2			2
432	2019-02-27 09:07:03	ayaregal@clintonhealthaccess.org	2019-01-29	Tafese		CHAI		2	201	2001	55841	27/3/2011Ec	27/3/2011Ec	7		2	12	3	1	99	9	9	999	A	1	0	0	0	0	0	0	0	0	0	0	0	0	0	0	0	0		2			2
433	2019-02-27 09:07:04	ayaregal@clintonhealthaccess.org	2019-01-29	Tafese		CHAI		2	201	2001	60272	26/3/2011Ec	26/3/2011Ec	10		1	11	2	1	11	9	9	999	A G	1	0	0	0	0	0	1	0	0	0	0	0	0	0	0	0	0		2			2
434	2019-02-27 09:07:04	ayaregal@clintonhealthaccess.org	2019-01-29	Tafese		CHAI		2	201	2001	68887	2473/2011Ec	24/3/2011Ec	10		1	8	2	2	7	9	9	999	A G	1	0	0	0	0	0	1	0	0	0	0	0	0	0	0	0	0		2			2
435	2019-02-27 09:07:05	ayaregal@clintonhealthaccess.org	2019-01-29	Tafese		CHAI		2	201	2001	90499	19/3/2011Ec	19/3/2011Ec	7		1	6	2	1	99	9	9	55	C	0	0	1	0	0	0	0	0	0	0	0	0	0	0	0	0	0		2			2
436	2019-02-27 09:07:05	ayaregal@clintonhealthaccess.org	2019-01-29	Tafese		CHAI		2	201	2001	59743	17/372011Ec	17/3/2011Ec	10		5	53	3	1	14	9	9	999	A G	1	0	0	0	0	0	1	0	0	0	0	0	0	0	0	0	0		2			2
437	2019-02-27 09:07:06	ayaregal@clintonhealthaccess.org	2019-01-29	Tafese		CHAI		2	201	2001	89520	12/3/2011Ec	12/3/2011Ec	7		5	48	3	2	99	9	9	999	A D G K	1	0	0	1	0	0	1	0	0	0	1	0	0	0	0	0	0		2			2
438	2019-02-27 09:07:06	ayaregal@clintonhealthaccess.org	2019-01-29	Tafese		CHAI		2	201	2001	88167	10/3/2011Ec	10/3/2011Ec	7		5	52	3	9	15	9	9	999	A G	1	0	0	0	0	0	1	0	0	0	0	0	0	0	0	0	0		2			2
439	2019-02-27 09:07:07	ayaregal@clintonhealthaccess.org	2019-01-29	Tafese		CHAI		2	201	2001	9	28/2/2011Ec	28/2/2011Ec	7		1	6	2	1	9	9	9	999	A G	1	0	0	0	0	0	1	0	0	0	0	0	0	0	0	0	0		2			2
440	2019-02-27 09:07:08	ayaregal@clintonhealthaccess.org	2020-01-29	Tafese		CHAI		2	201	2001	87818	28/2/2011Ec	28/2/2011Ec	7		1	5	2	1	7	9	9	999	A G K	1	0	0	0	0	0	1	0	0	0	1	0	0	0	0	0	0		2			2
441	2019-02-27 09:07:09	ayaregal@clintonhealthaccess.org	2019-01-29	Tafese		CHAI		2	201	2001	87467	20/2/2011Ec	20/2/2011Ec	7		5	59	3	1	15	9	9	999	A G	1	0	0	0	0	0	1	0	0	0	0	0	0	0	0	0	0		2			2
442	2019-02-27 09:07:09	ayaregal@clintonhealthaccess.org	2019-01-29	Tafese		CHAI		2	201	2001	87321	19/2/2011Ec	19/2/2011Ec	7		6	0	1	2	8.5	9	9	999	A G K	1	0	0	0	0	0	1	0	0	0	1	0	0	0	0	0	0		2			2
443	2019-02-27 09:07:09	ayaregal@clintonhealthaccess.org	2019-01-29	Tafese		CHAI		2	201	2001	91992	4/4/2011Ec	4/4/2011Ec	7		1	4	2	2	99	9	9	999	A G	1	0	0	0	0	0	1	0	0	0	0	0	0	0	0	0	0		2			2
444	2019-02-27 09:07:10	ayaregal@clintonhealthaccess.org	2019-01-29	Tafese		CHAI		2	201	2001	81737	9	9	7		1	3	2	1	99	9	9	999	A G	1	0	0	0	0	0	1	0	0	0	0	0	0	0	0	0	0		2			2
445	2019-02-27 09:07:10	ayaregal@clintonhealthaccess.org	2019-01-29	Tafese		CHAI		2	201	2001	92104	8/4/2011Ec	8/4/2011Ec	10		1	10	2	2	10	9	9	999	A C	1	0	1	0	0	0	0	0	0	0	0	0	0	0	0	0	0		2			2
446	2019-02-27 09:07:11	ayaregal@clintonhealthaccess.org	2019-01-29	Tafese		CHAI		2	201	2001	66904	9/4/2011Ec	9/4/2011Ec	10		1	10	2	9	99	9	9	999	A C	1	0	1	0	0	0	0	0	0	0	0	0	0	0	0	0	0		2			2
447	2019-02-27 09:07:12	ayaregal@clintonhealthaccess.org	2019-01-29	Tafese		CHAI		2	201	2001	60626	10/4/2011Ec	10/4/2011Ec	7		2	12	3	2	99	9	9	999	A B I	1	1	0	0	0	0	0	0	1	0	0	0	0	0	0	0	0		2			2
448	2019-02-27 09:07:12	ayaregal@clintonhealthaccess.org	2019-01-29	Tafese		CHAI		2	201	2001	67600	11/4/2011Ec	11/4/2011Ec	10		1	9	2	2	7	9	9	999	A G	1	0	0	0	0	0	1	0	0	0	0	0	0	0	0	0	0		2			2
449	2019-02-27 09:07:13	ayaregal@clintonhealthaccess.org	2019-01-29	Tafese		CHAI		2	201	2001	90792	18/4/2011Ec	18/4/2011Ec	10		1	3	2	9	99	9	9	999	A D K	1	0	0	1	0	0	0	0	0	0	1	0	0	0	0	0	0		2			2
450	2019-02-27 09:07:13	ayaregal@clintonhealthaccess.org	2019-01-29	Tafese		CHAI		2	201	2001	93871	26/4/2011Ec	26/4/2011Ec	7		1	0	1	1	99	9	9	999	E X	0	0	0	0	1	0	0	0	0	0	0	0	0	0	0	1	0	Mouth lession	2			2
451	2019-02-27 09:07:14	ayaregal@clintonhealthaccess.org	2019-01-29	Tafese		CHAI		2	201	2001	92089	8/4/2011Ec	8/4/2011Ec	10		1	0	1	1	99	9	9	999	G	0	0	0	0	0	0	1	0	0	0	0	0	0	0	0	0	0		2			2
452	2019-02-27 09:07:14	ayaregal@clintonhealthaccess.org	2019-01-29	Tafese		CHAI		2	201	2001	87689	29/2/2011Ec	29/2/2011Ec	10		1	0	1	2	99	9	9	999	X	0	0	0	0	0	0	0	0	0	0	0	0	0	0	0	1	0	Swollen Breast	2			2
453	2019-02-27 09:41:45	akebede@clintonhealthaccess.org	2019-02-01	Abebe kebede		chai		4	401	4002	18337	2011-09-04	2011-09-04	9	no admission	4	41	3	1	14	88	36.1	43	A	1	0	0	0	0	0	0	0	0	0	0	0	0	0	0	0	0		2			2
454	2019-02-27 09:45:33	akebede@clintonhealthaccess.org	2019-02-01	Abebe kebede		chai		4	401	4002	33422	2011-10-04	2011-10-04	9	no admission	2	23	3	1	99	9	9	43	A	1	0	0	0	0	0	0	0	0	0	0	0	0	0	0	0	0		2			2
455	2019-02-27 09:49:11	akebede@clintonhealthaccess.org	2019-02-01	Abebe kebede		chai		4	401	4002	37448	2011-11-04	2011-11-04	9	no admission	1	8	2	2	7.3	67	36.4	54	A	1	0	0	0	0	0	0	0	0	0	0	0	0	0	0	0	0		2			2
456	2019-02-27 09:53:22	akebede@clintonhealthaccess.org	2019-02-01	Abebe kebede		chai		4	401	4002	39733	2011-12-04	2011-12-04	9	no admission	1	6	2	1	6.4	64	36.1	62	A	1	0	0	0	0	0	0	0	0	0	0	0	0	0	0	0	0		2			2
457	2019-02-27 09:56:44	akebede@clintonhealthaccess.org	2019-02-01	Abebe kebede		chai		4	401	4002	39753	15/4/11	15/4/11	9	no admission	1	5	2	2	5	62	36	58	A	1	0	0	0	0	0	0	0	0	0	0	0	0	0	0	0	0		2			2
458	2019-02-27 10:05:25	akebede@clintonhealthaccess.org	2019-02-01	Abebe kebede		chai		4	401	4002	39754	15/4/11	15/4/11	9	no admission	2	18	3	1	11	70	36	42	A	1	0	0	0	0	0	0	0	0	0	0	0	0	0	0	0	0		2			2
459	2019-02-27 10:08:48	akebede@clintonhealthaccess.org	2019-02-01	Abebe kebede		chai		4	401	4002	33818	17/4/11	17/4/11	9	no admission	1	10	2	1	8.3	61	36.1	54	A	1	0	0	0	0	0	0	0	0	0	0	0	0	0	0	0	0		2			2
460	2019-02-27 10:12:50	akebede@clintonhealthaccess.org	2019-02-01	Abebe kebede		chai		4	401	4002	19521	18/4/11	18/4/11	9	no admission	3	34	3	2	14	82	36.2	40	A	1	0	0	0	0	0	0	0	0	0	0	0	0	0	0	0	0		2			2
461	2019-02-27 10:16:03	akebede@clintonhealthaccess.org	2019-02-01	Abebe kebede		chai		4	401	4002	34127	22/4/11	22/4/11	9	no admission	2	22	3	1	11.3	76	36.1	46	A	1	0	0	0	0	0	0	0	0	0	0	0	0	0	0	0	0		2			2
462	2019-02-27 10:19:31	akebede@clintonhealthaccess.org	2019-02-01	Abebe kebede		chai		4	401	4002	36230	24/4/11	24/4/11	9	no admission	1	9	2	2	7	68	36.2	53	A	1	0	0	0	0	0	0	0	0	0	0	0	0	0	0	0	0		2			2
463	2019-02-27 10:24:50	akebede@clintonhealthaccess.org	2019-02-02	Abebe kebede		chai		4	401	4003	57953	2011-01-02	2011-01-02	9	no admission	1	9	2	1	9.4	9	37	50	A B	1	1	0	0	0	0	0	0	0	0	0	0	0	0	0	0	0		2			2
464	2019-02-27 10:28:12	akebede@clintonhealthaccess.org	2019-02-02	Abebe kebede		chai		4	401	4003	98910	2011-01-02	2011-01-02	9	no admission	5	59	3	2	16	9	37	41	A B	1	1	0	0	0	0	0	0	0	0	0	0	0	0	0	0	0		2			2
465	2019-02-27 10:31:26	akebede@clintonhealthaccess.org	2019-02-02	Abebe kebede		chai		4	401	4003	50191	2011-01-02	2011-01-02	9	no admission	3	24	3	1	10	9	37	40	A B	1	1	0	0	0	0	0	0	0	0	0	0	0	0	0	0	0		2			2
466	2019-02-27 10:35:00	akebede@clintonhealthaccess.org	2019-02-02	Abebe kebede		chai		4	401	4003	59432	2011-01-02	2011-01-02	9	no admission	1	10	2	1	9.4	9	37	50	A B	1	1	0	0	0	0	0	0	0	0	0	0	0	0	0	0	0		2			2
467	2019-02-27 10:37:56	akebede@clintonhealthaccess.org	2019-02-02	Abebe kebede		chai		4	401	4003	48636	2011-02-02	2011-02-02	9	no admission	2	17	3	1	10	9	37.3	43	A	1	0	0	0	0	0	0	0	0	0	0	0	0	0	0	0	0		2			2
468	2019-02-27 10:40:57	akebede@clintonhealthaccess.org	2019-02-02	Abebe kebede		chai		4	401	4003	60668	2011-02-02	2011-02-02	9	no admission	2	13	3	1	10	9	37.2	40	A B	1	1	0	0	0	0	0	0	0	0	0	0	0	0	0	0	0		2			2
469	2019-02-27 10:42:34	rgebeyehu@clintonhealthaccess.org	2019-02-12	Remrim Gebeyehu		CHAI		1	102	1002	39526	28/01/11	28/01/11	9	Managed as out patient	2	21	3	1	99	9	9	999	Y	0	0	0	0	0	0	0	0	0	0	0	0	0	0	0	0	1		2			2
470	2019-02-27 10:44:58	akebede@clintonhealthaccess.org	2019-02-02	Abebe kebede		chai		4	401	4003	53439	2011-02-02	2011-02-02	9	no admission	2	19	3	2	10	9	37	40	A B	1	1	0	0	0	0	0	0	0	0	0	0	0	0	0	0	0		2			2
471	2019-02-27 10:48:35	akebede@clintonhealthaccess.org	2019-02-02	Abebe kebede		chai		4	401	4003	54521	2011-02-02	2011-02-02	9	no admission	2	17	3	2	11	9	37.3	43	A B	1	1	0	0	0	0	0	0	0	0	0	0	0	0	0	0	0		2			2
472	2019-02-27 10:52:09	akebede@clintonhealthaccess.org	2019-02-02	Abebe kebede		chai		4	401	4003	57809	2011-05-02	2011-05-02	9	no admission	1	10	2	2	7.7	9	37	52	A B	1	1	0	0	0	0	0	0	0	0	0	0	0	0	0	0	0		2			2
473	2019-02-27 10:55:24	akebede@clintonhealthaccess.org	2019-02-02	Abebe kebede		chai		4	401	4003	63463	2011-05-02	2011-05-02	9	no admission	1	7	2	2	7.5	9	37	53	A B	1	1	0	0	0	0	0	0	0	0	0	0	0	0	0	0	0		2			2
474	2019-02-27 10:55:25	rgebeyehu@clintonhealthaccess.org	2019-02-12	Remrim Gebeyehu		CHAI		1	102	1002	17551	29/01/11	29/01/11	9	Managed as out patient	5	48	3	2	99	9	9	999	Y	0	0	0	0	0	0	0	0	0	0	0	0	0	0	0	0	1		2			2
475	2019-02-27 10:59:18	akebede@clintonhealthaccess.org	2019-02-02	Abebe kebede		chai		4	401	4003	61405	2011-05-02	2011-05-02	9	no admission	1	3	2	1	6.5	9	37	51	A B	1	1	0	0	0	0	0	0	0	0	0	0	0	0	0	0	0		2			2
476	2019-02-27 11:03:01	akebede@clintonhealthaccess.org	2019-02-02	Abebe kebede		chai		4	401	4003	59939	2011-05-02	2011-05-02	9	no admission	1	4	2	2	6.9	9	37.1	50	A B	1	1	0	0	0	0	0	0	0	0	0	0	0	0	0	0	0		2			2
477	2019-02-27 11:04:49	rgebeyehu@clintonhealthaccess.org	2019-02-12	Remrim Gebeyehu		CHAI		1	102	1002	75779	2011-02-02	2011-02-02	9	Managed as out patient	1	7	2	2	99	9	9	999	Y	0	0	0	0	0	0	0	0	0	0	0	0	0	0	0	0	1		2			2
478	2019-02-27 11:08:15	akebede@clintonhealthaccess.org	2019-02-02	Abebe kebede		chai		4	401	4003	58738	2011-05-02	2011-05-02	9	no admission	1	7	2	2	99	9	37	50	A B	1	1	0	0	0	0	0	0	0	0	0	0	0	0	0	0	0		2			2
479	2019-02-27 11:09:29	rgebeyehu@clintonhealthaccess.org	2019-02-12	Remrim Gebeyehu		CHAI		1	102	1002	78623	2011-02-02	2011-02-02	9	Managed as out patient	1	7	2	2	99	9	9	999	Y	0	0	0	0	0	0	0	0	0	0	0	0	0	0	0	0	1		2			2
480	2019-02-27 11:14:09	akebede@clintonhealthaccess.org	2019-02-02	Abebe kebede		chai		4	401	4003	60592	2011-06-02	2011-06-02	9	no admission	1	6	2	2	7.7	9	37	51	A B	1	1	0	0	0	0	0	0	0	0	0	0	0	0	0	0	0		2			2
481	2019-02-27 11:18:57	akebede@clintonhealthaccess.org	2019-02-02	Abebe kebede		chai		4	401	4003	58108	2011-06-02	2011-06-02	9	no admission	1	9	2	1	6.9	9	37	50	A B	1	1	0	0	0	0	0	0	0	0	0	0	0	0	0	0	0		2			2
482	2019-02-27 11:21:41	rgebeyehu@clintonhealthaccess.org	2019-02-12	Remrim Gebeyehu		CHAI		1	102	1002	81033	2011-02-02	2011-02-02	9	Managed as out patient	3	24	3	2	99	9	9	999	Y	0	0	0	0	0	0	0	0	0	0	0	0	0	0	0	0	1		2			2
483	2019-02-27 11:23:07	akebede@clintonhealthaccess.org	2019-02-02	Abebe kebede		chai		4	401	4003	63502	2011-06-02	2011-06-02	9	no admission	1	6	2	2	7	9	37	999	A	1	0	0	0	0	0	0	0	0	0	0	0	0	0	0	0	0		2			2
484	2019-02-27 11:26:37	rgebeyehu@clintonhealthaccess.org	2019-02-12	Remrim Gebeyehu		CHAI		1	102	1002	68273	2011-05-02	2011-05-02	9	Managed as out patient	1	6	2	2	99	9	9	999	Y	0	0	0	0	0	0	0	0	0	0	0	0	0	0	0	0	1		2			2
485	2019-02-27 11:26:59	akebede@clintonhealthaccess.org	2019-02-02	Abebe kebede		chai		4	401	4003	57772	2011-06-02	2011-06-02	9	no admission	2	19	3	1	10	9	37	42	A B	1	1	0	0	0	0	0	0	0	0	0	0	0	0	0	0	0		2			2
486	2019-02-27 11:30:56	akebede@clintonhealthaccess.org	2019-02-02	Abebe kebede		chai		4	401	4003	61991	2011-06-02	2011-06-02	9	no admission	1	6	2	1	99	9	37	52	A B	1	1	0	0	0	0	0	0	0	0	0	0	0	0	0	0	0		2			2
487	2019-02-27 11:33:28	rgebeyehu@clintonhealthaccess.org	2019-02-12	Remrim Gebeyehu		CHAI		1	102	1002	81190	2011-05-02	2011-05-02	9	Manged as out patient	1	11	2	2	99	9	9	999	Y	0	0	0	0	0	0	0	0	0	0	0	0	0	0	0	0	1		2			2
488	2019-02-27 11:34:00	akebede@clintonhealthaccess.org	2019-02-02	Abebe kebede		chai		4	401	4003	54654	2011-06-02	2011-06-02	9	no admission	2	15	3	2	10	9	37.3	41	A B	1	1	0	0	0	0	0	0	0	0	0	0	0	0	0	0	0		2			2
489	2019-02-27 11:35:39	ayaregal@clintonhealthaccess.org	2019-01-30	Tafese		CHAI		2	202	2002	89402	13/3/2011Ec	14/3/2011Ec	3		1	0	1	1	2.8	9	9	999	X	0	0	0	0	0	0	0	0	0	0	0	0	0	0	0	1	0	Distressed	2			2
490	2019-02-27 11:35:39	ayaregal@clintonhealthaccess.org	2019-01-30	Tafese		CHAI		2	202	2002	89429	16/3/2011Ec	17/3/2011Ec	3		1	0	1	2	3.2	9	9	999	X	0	0	0	0	0	0	0	0	0	0	0	0	0	0	0	1	0	Distressed	2			2
491	2019-02-27 11:35:40	ayaregal@clintonhealthaccess.org	2019-01-30	Tafese		CHAI		2	202	2002	89365	11/3/2011Ec	12/3/2011Ec	3		1	0	1	2	3	9	9	999	X	0	0	0	0	0	0	0	0	0	0	0	0	0	0	0	1	0	Distressed	2			2
492	2019-02-27 11:35:40	ayaregal@clintonhealthaccess.org	2019-01-30	Tafese		CHAI		2	202	2002	88418	14/2/11Ec	14/2/11Ec	10		1	0	1	2	3.8	50	36.6	68	A E	1	0	0	0	1	0	0	0	0	0	0	0	0	0	0	0	0		2			2
493	2019-02-27 11:35:41	ayaregal@clintonhealthaccess.org	2019-01-30	Tafese		CHAI		2	202	2002	90104	18/4/11Ec	18/4/11Ec	7		1	0	1	1	1.1	44	35.4	77	D E	0	0	0	1	1	0	0	0	0	0	0	0	0	0	0	0	0		2			2
494	2019-02-27 11:35:41	ayaregal@clintonhealthaccess.org	2019-01-30	Tafese		CHAI		2	202	2002	88595	12/2/11Ec	12/2/11Ec	10		1	0	1	1	2.5	42	36.1	67	A D	1	0	0	1	0	0	0	0	0	0	0	0	0	0	0	0	0		2			2
495	2019-02-27 11:35:42	ayaregal@clintonhealthaccess.org	2019-01-30	Tafese		CHAI		2	202	2002	81957	19/2/11Ec	19/2/11Ec	3		3	25	3	1	11.6	80	37.2	49	A G	1	0	0	0	0	0	1	0	0	0	0	0	0	0	0	0	0		2			2
496	2019-02-27 11:35:42	ayaregal@clintonhealthaccess.org	2019-01-30	Tafese		CHAI		2	202	2002	42558	15/2/11Ec	15/2/11Ec	3		2	18	3	2	10.8	77	37.1	49	A G	1	0	0	0	0	0	1	0	0	0	0	0	0	0	0	0	0		2			2
497	2019-02-27 11:35:43	ayaregal@clintonhealthaccess.org	2019-01-30	Tafese		CHAI		2	202	2002	79677	15/2/11Ec	15/2/11Ec	3		2	15	3	1	10	72	37.5	44	A G	1	0	0	0	0	0	1	0	0	0	0	0	0	0	0	0	0		2			2
498	2019-02-27 11:35:43	ayaregal@clintonhealthaccess.org	2019-01-30	Tafese		CHAI		2	202	2002	80370	15/2/11Ec	15/2/11Ec	3		2	12	3	1	10	75	37.5	46	G	0	0	0	0	0	0	1	0	0	0	0	0	0	0	0	0	0		2			2
499	2019-02-27 11:35:44	ayaregal@clintonhealthaccess.org	2019-01-30	Tafese		CHAI		2	202	2002	79943	13/2/11Ec	13/2/11Ec	3		2	13	3	1	10.1	76	37.6	49	A G	1	0	0	0	0	0	1	0	0	0	0	0	0	0	0	0	0		2			2
500	2019-02-27 11:35:44	ayaregal@clintonhealthaccess.org	2019-01-30	Tafese		CHAI		2	202	2002	37314	13/2/11Ec	13/2/11Ec	3		2	19	3	2	10.8	79	37.8	46	A G	1	0	0	0	0	0	1	0	0	0	0	0	0	0	0	0	0		2			2
501	2019-02-27 11:35:45	ayaregal@clintonhealthaccess.org	2019-01-30	Tafese		CHAI		2	202	2002	85668	12/2/11Ec	12/2/11Ec	3		1	5	2	1	6	60	37.5	56	A G	1	0	0	0	0	0	1	0	0	0	0	0	0	0	0	0	0		2			2
502	2019-02-27 11:35:46	ayaregal@clintonhealthaccess.org	2019-01-30	Tafese		CHAI		2	202	2002	7729	8/2/11Ec	8/2/11Ec	3		3	24	3	2	9	72	38	50	A G	1	0	0	0	0	0	1	0	0	0	0	0	0	0	0	0	0		2			2
503	2019-02-27 11:35:47	ayaregal@clintonhealthaccess.org	2019-01-30	Tafese		CHAI		2	202	2002	76010	8/2/11Ec	8/2/11Ec	3		2	18	3	1	9.9	78	37.6	47	A G	1	0	0	0	0	0	1	0	0	0	0	0	0	0	0	0	0		2			2
504	2019-02-27 11:35:47	ayaregal@clintonhealthaccess.org	2019-01-30	Tafese		CHAI		2	202	2002	88628	8/2/11Ec	8/2/11Ec	3		1	9	2	1	8.5	69	36.1	53	A	1	0	0	0	0	0	0	0	0	0	0	0	0	0	0	0	0		2			2
505	2019-02-27 11:35:48	ayaregal@clintonhealthaccess.org	2019-01-30	Tafese		CHAI		2	202	2002	30090	4/3/11Ec	4/3/11Ec	3		5	59	3	1	15.2	102	36.6	44	A G	1	0	0	0	0	0	1	0	0	0	0	0	0	0	0	0	0		2			2
506	2019-02-27 11:35:48	ayaregal@clintonhealthaccess.org	2019-01-30	Tafese		CHAI		2	202	2002	56853	3/3/11Ec	3/3/11Ec	10		4	36	3	2	13	9	9	999	A D G	1	0	0	1	0	0	1	0	0	0	0	0	0	0	0	0	0		2			2
507	2019-02-27 11:35:49	ayaregal@clintonhealthaccess.org	2019-01-30	Tafese		CHAI		2	202	2002	83141	3/3/11Ec	3/3/11Ec	10		1	11	2	2	7.6	9	9	999	A G	1	0	0	0	0	0	1	0	0	0	0	0	0	0	0	0	0		2			2
508	2019-02-27 11:35:49	ayaregal@clintonhealthaccess.org	2019-01-30	Tafese		CHAI		2	202	2002	86101	3/3/11Ec	3/3/11Ec	10		2	19	3	1	10	9	9	999	A G	1	0	0	0	0	0	1	0	0	0	0	0	0	0	0	0	0		2			2
509	2019-02-27 11:37:03	akebede@clintonhealthaccess.org	2019-02-02	Abebe kebede		chai		4	401	4003	57067	2011-07-02	2011-07-02	9	no admission	2	12	3	1	9	9	36	999	A	1	0	0	0	0	0	0	0	0	0	0	0	0	0	0	0	0		2			2
510	2019-02-27 11:40:04	akebede@clintonhealthaccess.org	2019-02-02	Abebe kebede		chai		4	401	4003	59250	2011-08-02	2011-08-02	9	no admission	1	6	2	1	6.7	64	37.2	999	A B	1	1	0	0	0	0	0	0	0	0	0	0	0	0	0	0	0		2			2
511	2019-02-27 11:40:07	rgebeyehu@clintonhealthaccess.org	2019-02-12	Remrim Gebeyehu		CHAI		1	102	1002	54238	2011-05-02	2011-05-02	9	Managed as out patient	2	12	3	2	99	9	9	999	Y	0	0	0	0	0	0	0	0	0	0	0	0	0	0	0	0	1		2			2
512	2019-02-27 11:43:36	akebede@clintonhealthaccess.org	2019-02-02	Abebe kebede		chai		4	401	4003	58994	2011-08-02	2011-08-02	9	no admission	2	15	3	1	12	90	38.2	999	A	1	0	0	0	0	0	0	0	0	0	0	0	0	0	0	0	0		2			2
513	2019-02-27 11:46:26	akebede@clintonhealthaccess.org	2019-02-02	Abebe kebede		chai		4	401	4003	53247	2011-08-02	2011-08-02	9	no admission	2	18	3	1	11	92	38.9	999	A	1	0	0	0	0	0	0	0	0	0	0	0	0	0	0	0	0		2			2
514	2019-02-27 11:46:28	rgebeyehu@clintonhealthaccess.org	2019-02-12	Remrim Gebeyehu		CHAI		1	102	1002	81297	2011-06-02	2011-06-02	9	Managed as out patient	3	24	3	2	99	9	9	999	Y	0	0	0	0	0	0	0	0	0	0	0	0	0	0	0	0	1		2			2
515	2019-02-27 11:49:24	akebede@clintonhealthaccess.org	2019-02-02	Abebe kebede		chai		4	401	4003	55803	2011-08-02	2011-08-02	9	no admission	2	14	3	2	10	84	39.2	999	A	1	0	0	0	0	0	0	0	0	0	0	0	0	0	0	0	0		2			2
516	2019-02-27 11:51:39	rgebeyehu@clintonhealthaccess.org	2019-02-12	Remrim Gebeyehu		CHAI		1	102	1002	56328	2011-06-02	2011-06-02	9	Managed as out patient	2	12	3	2	99	9	9	999	Y	0	0	0	0	0	0	0	0	0	0	0	0	0	0	0	0	1		2			2
517	2019-02-27 11:56:18	rgebeyehu@clintonhealthaccess.org	2019-02-12	Remrim Gebeyehu		CHAI		1	102	1002	54522	2011-07-02	2011-07-02	9	managed as out patient	2	12	3	1	99	9	9	999	Y	0	0	0	0	0	0	0	0	0	0	0	0	0	0	0	0	1		2			2
518	2019-02-27 12:01:34	rgebeyehu@clintonhealthaccess.org	2019-02-12	Remrim Gebeyehu		CHAI		1	102	1002	45825	2011-08-02	2011-08-02	9	Managed as out patient	2	12	3	2	99	9	9	999	Y	0	0	0	0	0	0	0	0	0	0	0	0	0	0	0	0	1		2			2
519	2019-02-27 12:07:26	rgebeyehu@clintonhealthaccess.org	2019-02-12	Remrim Gebeyehu		CHAI		1	102	1002	63500	2011-08-02	2011-08-02	9	Managed as out patient	1	10	2	1	99	9	9	999	Y	0	0	0	0	0	0	0	0	0	0	0	0	0	0	0	0	1		2			2
520	2019-02-27 12:12:11	rgebeyehu@clintonhealthaccess.org	2019-02-12	Remrim Gebeyhu		CHAI		1	102	1002	64171	2011-08-02	2011-08-02	9	Managed as out patient	1	8	2	1	99	9	9	999	Y	0	0	0	0	0	0	0	0	0	0	0	0	0	0	0	0	1		2			2
521	2019-02-27 12:45:43	ayaregal@clintonhealthaccess.org	2019-01-30	Tafese		CHAI		2	202	2002	67644	3/3/11Ec	3/3/11Ec	10		3	28	3	2	11	9	9	999	A G	1	0	0	0	0	0	1	0	0	0	0	0	0	0	0	0	0		2			2
522	2019-02-27 12:45:44	ayaregal@clintonhealthaccess.org	2019-01-30	Tafese		CHAI		2	202	2002	64485	3/3/11Ec	3/3/11Ec	3		2	22	3	1	10.9	80	37.8	47	A G	1	0	0	0	0	0	1	0	0	0	0	0	0	0	0	0	0		2			2
523	2019-02-27 12:45:44	ayaregal@clintonhealthaccess.org	2019-01-30	Tafese		CHAI		2	202	2002	88916	3/3/11Ec	3/3/11Ec	3		5	52	3	2	14.8	92	36.7	43	A B G	1	1	0	0	0	0	1	0	0	0	0	0	0	0	0	0	0		2			2
524	2019-02-27 12:45:45	ayaregal@clintonhealthaccess.org	2019-01-30	Tafese		CHAI		2	202	2002	80497	29/2/11Ec	29/2/11Ec	10		2	12	3	2	9	9	9	999	A B G	1	1	0	0	0	0	1	0	0	0	0	0	0	0	0	0	0		2			2
525	2019-02-27 12:45:45	ayaregal@clintonhealthaccess.org	2019-01-30	Tafese		CHAI		2	202	2002	50025	29/2/11Ec	29/2/11Ec	10		5	48	3	1	15	9	9	999	A D G	1	0	0	1	0	0	1	0	0	0	0	0	0	0	0	0	0		2			2
526	2019-02-27 12:45:46	ayaregal@clintonhealthaccess.org	2019-01-30	Tafese		CHAI		2	202	2002	61744	28/2/11Ec	28/2/11Ec	10		5	48	3	2	14	9	9	999	A G	1	0	0	0	0	0	1	0	0	0	0	0	0	0	0	0	0		2			2
527	2019-02-27 12:45:47	ayaregal@clintonhealthaccess.org	2019-01-30	Tafese		CHAI		2	202	2002	84230	28/2/11Ec	28/2/11Ec	10		1	7	2	1	6	9	9	999	A D G	1	0	0	1	0	0	1	0	0	0	0	0	0	0	0	0	0		2			2
528	2019-02-27 12:45:47	ayaregal@clintonhealthaccess.org	2019-01-30	Tafese		CHAI		2	202	2002	84480	27/2/11Ec	27/2/11Ec	10		1	6	2	2	6	9	9	999	A G	1	0	0	0	0	0	1	0	0	0	0	0	0	0	0	0	0		2			2
529	2019-02-27 12:45:48	ayaregal@clintonhealthaccess.org	2019-01-30	Tafese		CHAI		2	202	2002	82359	26/2/11Ec	26/2/11Ec	10		2	12	3	2	9.5	9	9	999	A G	1	0	0	0	0	0	1	0	0	0	0	0	0	0	0	0	0		2			2
530	2019-02-27 12:45:48	ayaregal@clintonhealthaccess.org	2019-01-30	Tafese		CHAI		2	202	2002	86162	26/2/11Ec	26/2/11Ec	10		1	4	2	1	6.8	9	9	999	A D G	1	0	0	1	0	0	1	0	0	0	0	0	0	0	0	0	0		2			2
531	2019-02-27 12:45:49	ayaregal@clintonhealthaccess.org	2019-01-30	Tafese		CHAI		2	202	2002	64603	22/2/11Ec	22/2/11Ec	3		2	21	3	1	10.2	80	36.8	44	A G	1	0	0	0	0	0	1	0	0	0	0	0	0	0	0	0	0		2			2
532	2019-02-27 12:45:50	ayaregal@clintonhealthaccess.org	2019-01-30	Tafese		CHAI		2	202	2002	76414	22/2/11Ec	22/2/11Ec	3		2	18	3	1	10.1	79	36.9	51	A G	1	0	0	0	0	0	1	0	0	0	0	0	0	0	0	0	0		2			2
533	2019-02-27 12:45:50	ayaregal@clintonhealthaccess.org	2019-01-30	Tafese		CHAI		2	202	2002	88451	20/2/11Ec	20/2/11Ec	3		1	7	2	1	8.2	69	36.5	56	A G	1	0	0	0	0	0	1	0	0	0	0	0	0	0	0	0	0		2			2
534	2019-02-27 12:45:50	ayaregal@clintonhealthaccess.org	2019-01-30	Tafese		CHAI		2	202	2002	88862	19/2/11Ec	19/2/11Ec	3		4	37	3	1	12.9	80	36.7	40	A	1	0	0	0	0	0	0	0	0	0	0	0	0	0	0	0	0		2			2
535	2019-02-27 12:45:51	ayaregal@clintonhealthaccess.org	2019-01-30	Tafese		CHAI		2	202	2002	68098	19/2/11Ec	19/2/11Ec	3		3	26	3	1	11.9	80	36.8	51	A G	1	0	0	0	0	0	1	0	0	0	0	0	0	0	0	0	0		2			2
536	2019-02-27 12:45:52	ayaregal@clintonhealthaccess.org	2019-01-30	Tafese		CHAI		2	202	2002	77884	19/2/11Ec	19/2/11Ec	3		2	17	3	1	9.9	78	36.9	47	A G	1	0	0	0	0	0	1	0	0	0	0	0	0	0	0	0	0		2			2
537	2019-02-27 12:45:52	ayaregal@clintonhealthaccess.org	2019-01-30	Tafese		CHAI		2	202	2002	79440	11/4/11Ec	11/4/11Ec	3		2	16	3	2	10.7	76	37.8	48	A G	1	0	0	0	0	0	1	0	0	0	0	0	0	0	0	0	0		2			2
538	2019-02-27 12:45:53	ayaregal@clintonhealthaccess.org	2019-01-30	Tafese		CHAI		2	202	2002	87314	10/4/11Ec	10/4/11Ec	3		2	23	3	2	11.8	80	36.7	47	A G	1	0	0	0	0	0	1	0	0	0	0	0	0	0	0	0	0		2			2
539	2019-02-27 12:45:53	ayaregal@clintonhealthaccess.org	2019-01-30	Tafese		CHAI		2	202	2002	85105	10/4/11Ec	10/4/11Ec	3		1	7	2	1	5.9	66	36.8	54	A G	1	0	0	0	0	0	1	0	0	0	0	0	0	0	0	0	0		2			2
540	2019-02-27 12:45:54	ayaregal@clintonhealthaccess.org	2019-01-30	Tafese		CHAI		2	202	2002	87314	17/3/11Ec	17/3/11Ec	3		2	22	3	2	11.2	82	36.9	48	A G	1	0	0	0	0	0	1	0	0	0	0	0	0	0	0	0	0		2			2
541	2019-02-27 13:43:34	rgebeyehu@clintonhealthaccess.org	2019-02-12	Remrim Gebeyehu		CHAI		1	102	1002	62758	2011-08-02	2011-08-02	9	Managed as out patient	3	24	3	2	99	9	9	999	Y	0	0	0	0	0	0	0	0	0	0	0	0	0	0	0	0	1		2			2
542	2019-02-27 13:48:45	rgebeyehu@clintonhealthaccess.org	2019-02-12	CHAI		CHAI		1	102	1002	76536	2011-12-02	2011-12-02	9	Managed as out patient	1	5	2	1	99	9	9	999	Y	0	0	0	0	0	0	0	0	0	0	0	0	0	0	0	0	1		2			2
543	2019-02-27 13:59:35	rgebeyehu@clintonhealthaccess.org	2019-02-12	Remrim Gebeyehu		CHAI		1	102	1002	81755	2011-12-02	2011-12-02	9	Managed as out patient	2	12	3	1	99	9	9	999	Y	0	0	0	0	0	0	0	0	0	0	0	0	0	0	0	0	1		2			2
544	2019-02-27 14:08:17	rgebeyehu@clintonhealthaccess.org	2019-02-12	Remrim Gebeyehu		CHAI		1	102	1002	65616	13/02/11	13/02/11	9	Managed as out patient	2	12	3	1	99	9	9	999	Y	0	0	0	0	0	0	0	0	0	0	0	0	0	0	0	0	1		2			2
545	2019-02-27 14:13:25	rgebeyehu@clintonhealthaccess.org	2019-02-12	Remrim Gebeyehu		CHAI		1	102	1002	10752	13/02/11	13/02/11	9	Managed as out patient	2	17	3	2	99	9	9	999	Y	0	0	0	0	0	0	0	0	0	0	0	0	0	0	0	0	1		2			2
546	2019-02-27 14:31:19	rgebeyehu@clintonhealthaccess.org	2019-02-12	Remrim Gebeyehu		CHAI		1	102	1002	59618	13/02/11	13/02/11	9	Managed as out patient	1	4	2	1	99	9	9	999	Y	0	0	0	0	0	0	0	0	0	0	0	0	0	0	0	0	1		2			2
547	2019-02-27 14:43:40	rgebeyehu@clintonhealthaccess.org	2019-02-12	Remrim Gebeyehu		CHAI		1	102	1002	81961	14/02/11	14/02/11	9	Managed as out patient	3	24	3	2	99	9	9	999	Y	0	0	0	0	0	0	0	0	0	0	0	0	0	0	0	0	1		2			2
548	2019-02-27 14:48:05	akebede@clintonhealthaccess.org	2019-02-02	Abebe kebede		chai		4	401	4003	47609	2011-08-02	2011-08-02	9	no admission	3	28	3	2	14	87	38	999	A	1	0	0	0	0	0	0	0	0	0	0	0	0	0	0	0	0		2			2
549	2019-02-27 14:54:50	ayaregal@clintonhealthaccess.org	2019-01-30	Tafese		CHAI		2	202	2002	85643	17/3/11Ec	17/3/11Ec	3		4	47	3	2	13.8	86	37.1	47	A G	1	0	0	0	0	0	1	0	0	0	0	0	0	0	0	0	0		2			2
550	2019-02-27 14:54:51	ayaregal@clintonhealthaccess.org	2019-01-30	Tafese		CHAI		2	202	2002	83143	14/3/11Ec	14/3/11Ec	3		1	8	2	1	8.8	66	38.4	56	A G	1	0	0	0	0	0	1	0	0	0	0	0	0	0	0	0	0		2			2
551	2019-02-27 14:54:51	ayaregal@clintonhealthaccess.org	2019-01-30	Tafese		CHAI		2	202	2002	84774	13/3/11Ec	13/3/11Ec	3		1	10	2	1	11.8	80	37.5	49	A G	1	0	0	0	0	0	1	0	0	0	0	0	0	0	0	0	0		2			2
552	2019-02-27 14:54:52	ayaregal@clintonhealthaccess.org	2019-01-30	Tafese		CHAI		2	202	2002	62932	13/3/11Ec	13/3/11Ec	3		3	35	3	2	13.1	86	37.1	48	A G	1	0	0	0	0	0	1	0	0	0	0	0	0	0	0	0	0		2			2
553	2019-02-27 14:54:52	ayaregal@clintonhealthaccess.org	2019-01-30	Tafese		CHAI		2	202	2002	84746	11/3/11Ec	11/3/11Ec	3		1	6	2	1	8.8	64	37.6	46	A G	1	0	0	0	0	0	1	0	0	0	0	0	0	0	0	0	0		2			2
554	2019-02-27 14:54:53	ayaregal@clintonhealthaccess.org	2019-01-30	Tafese		CHAI		2	202	2002	89347	12/3/11ec	12/3/11Ec	3		3	28	3	1	12.3	81	36.8	49	A G	1	0	0	0	0	0	1	0	0	0	0	0	0	0	0	0	0		2			2
555	2019-02-27 14:54:53	ayaregal@clintonhealthaccess.org	2019-01-30	Tafese		CHAI		2	202	2002	87274	10/3/11Ec	10/3/11Ec	3		2	19	3	2	10.4	79	37.2	46	A G	1	0	0	0	0	0	1	0	0	0	0	0	0	0	0	0	0		2			2
556	2019-02-27 14:54:54	ayaregal@clintonhealthaccess.org	2019-01-30	Tafese		CHAI		2	202	2002	88257	10/3/11Ec	10/3/11Ec	3		1	3	2	2	5.4	58	36.9	56	A C G	1	0	1	0	0	0	1	0	0	0	0	0	0	0	0	0	0		2			2
557	2019-02-27 14:54:54	ayaregal@clintonhealthaccess.org	2019-01-30	Tafese		CHAI		2	202	2002	86708	10/3/11Ec	10/3/11Ec	3		5	49	3	2	14.5	96	36.7	43	A G	1	0	0	0	0	0	1	0	0	0	0	0	0	0	0	0	0		2			2
558	2019-02-27 14:54:55	ayaregal@clintonhealthaccess.org	2019-01-30	Tafese		CHAI		2	202	2002	80142	10/4/11Ec	10/4/11Ec	3		2	18	3	1	10.8	80	36.8	46	A G	1	0	0	0	0	0	1	0	0	0	0	0	0	0	0	0	0		2			2
559	2019-02-27 14:54:55	ayaregal@clintonhealthaccess.org	2019-01-30	Tafese		CHAI		2	202	2002	89135	10/3/11Ec	10/3/11Ec	2		1	7	2	1	7.8	66	37.1	54	A G	1	0	0	0	0	0	1	0	0	0	0	0	0	0	0	0	0		2			2
560	2019-02-27 14:54:56	ayaregal@clintonhealthaccess.org	2019-01-30	Tafese		CHAI		2	202	2002	85888	10/3/11Ec	10/3/11Ec	3		1	5	2	1	7.2	60	36.8	55	A B G	1	1	0	0	0	0	1	0	0	0	0	0	0	0	0	0	0		2			2
561	2019-02-27 14:54:56	ayaregal@clintonhealthaccess.org	2019-01-30	Tafese		CHAI		2	202	2002	78993	6/3/11Ec	6/3/11Ec	2		3	24	3	1	12	81	38	40	A G K	1	0	0	0	0	0	1	0	0	0	1	0	0	0	0	0	0		2			2
562	2019-02-27 14:54:57	ayaregal@clintonhealthaccess.org	2019-01-30	Tafese		CHAI		2	202	2002	89224	5/3/11Ec	5/3/11Ec	3		3	35	3	1	12.8	82	38.8	49	A G	1	0	0	0	0	0	1	0	0	0	0	0	0	0	0	0	0		2			2
563	2019-02-27 14:54:57	ayaregal@clintonhealthaccess.org	2019-01-30	Tafese		CHAI		2	202	2002	73620	4/3/11Ec	4/3/11Ec	3		3	27	3	1	11.8	84	36.7	48	A D G	1	0	0	1	0	0	1	0	0	0	0	0	0	0	0	0	0		2			2
564	2019-02-27 14:54:58	ayaregal@clintonhealthaccess.org	2019-01-30	Tafese		CHAI		2	202	2002	76145	4/3/11Ec	4/3/11Ec	3		2	18	3	2	9.9	76	37.2	48	A G	1	0	0	0	0	0	1	0	0	0	0	0	0	0	0	0	0		2			2
565	2019-02-27 14:54:58	ayaregal@clintonhealthaccess.org	2019-01-30	Tafese		CHAI		2	202	2002	83818	11/4/11Ec	11/4/11Ec	3		1	10	2	2	8.8	69	37.5	55	A	1	0	0	0	0	0	0	0	0	0	0	0	0	0	0	0	0		2			2
566	2019-02-27 14:54:59	ayaregal@clintonhealthaccess.org	2019-01-30	Tafese		CHAI		2	202	2002	74699	15/4/11Ec	15/4/11Ec	3		2	23	3	2	11.8	80	37.1	49	A D G	1	0	0	1	0	0	1	0	0	0	0	0	0	0	0	0	0		2			2
567	2019-02-27 14:54:59	ayaregal@clintonhealthaccess.org	2019-01-30	Tafese		70434		2	202	2002	70434	15/4/11Ec	15/4/11Ec	3		5	59	3	2	16.1	104	38.9	51	A G	1	0	0	0	0	0	1	0	0	0	0	0	0	0	0	0	0		2			2
568	2019-02-27 14:55:00	ayaregal@clintonhealthaccess.org	2019-01-30	Tafese		CHAI		2	202	2002	50377	16/4/11Ec	16/4/11Ec	3		5	52	3	2	14.8	90	36.5	44	A G	1	0	0	0	0	0	1	0	0	0	0	0	0	0	0	0	0		2			2
569	2019-02-27 14:57:49	akebede@clintonhealthaccess.org	2019-02-02	Abebe kebede		chai		4	401	4003	55832	2011-09-02	2011-09-02	9	no admission	2	13	3	2	10	9	37	46	A B	1	1	0	0	0	0	0	0	0	0	0	0	0	0	0	0	0		2			2
570	2019-02-27 15:01:52	akebede@clintonhealthaccess.org	2019-02-02	Abebe kebede		chai		4	401	4003	67448	2011-11-02	2011-11-02	9	no admission	1	2	2	1	5	9	37	52	A B	1	1	0	0	0	0	0	0	0	0	0	0	0	0	0	0	0		2			2
571	2019-02-27 15:03:03	rgebeyehu@clintonhealthaccess.org	2019-02-12	Remrim Gebeyehu		CHAI		1	102	1002	6034	14/02/11	14/02/11	9	Managed as out patient	3	30	3	1	99	9	9	999	Y	0	0	0	0	0	0	0	0	0	0	0	0	0	0	0	0	1		2			2
572	2019-02-27 15:07:21	akebede@clintonhealthaccess.org	2019-02-02	Abebe kebede		chai		4	401	4003	58453	2011-11-02	2011-11-02	9	no admission	1	8	2	2	9.5	9	37	56	A B	1	1	0	0	0	0	0	0	0	0	0	0	0	0	0	0	0		2			2
573	2019-02-27 15:10:35	akebede@clintonhealthaccess.org	2019-02-02	Abebe kebede		chai		4	401	4003	60291	2011-12-02	2011-12-02	9	no admission	1	4	2	1	9	9	37	50	A B	1	1	0	0	0	0	0	0	0	0	0	0	0	0	0	0	0		2			2
574	2019-02-27 15:13:38	akebede@clintonhealthaccess.org	2019-02-02	Abebe kebede		chai		4	401	4003	57651	2011-12-02	2011-12-02	9	no admission	1	9	2	2	7.5	9	37	57	A B	1	1	0	0	0	0	0	0	0	0	0	0	0	0	0	0	0		2			2
575	2019-02-27 15:16:16	akebede@clintonhealthaccess.org	2019-02-02	Abebe kebede		chai		4	401	4003	61759	2011-12-02	2011-02-02	9	no admission	1	2	2	2	5.8	9	37.2	56	A B	1	1	0	0	0	0	0	0	0	0	0	0	0	0	0	0	0		2			2
576	2019-02-27 15:19:07	akebede@clintonhealthaccess.org	2019-02-02	Abebe kebede		chai		4	401	4003	38944	13/2/11	13/2/11	9	no admission	5	48	3	2	16	9	37	42	A B	1	1	0	0	0	0	0	0	0	0	0	0	0	0	0	0	0		2			2
577	2019-02-27 15:22:16	akebede@clintonhealthaccess.org	2019-02-02	Abebe kebede		chai		4	401	4003	53439	13/2/11	13/2/11	9	no admission	2	19	3	2	13	9	37	40	A B	1	1	0	0	0	0	0	0	0	0	0	0	0	0	0	0	0		2			2
578	2019-02-27 15:26:12	akebede@clintonhealthaccess.org	2019-02-02	Abebe kebede		chai		4	401	4003	62907	13/2/11	13/2/11	9	no admission	1	3	2	1	7.5	9	37	50	A B	1	1	0	0	0	0	0	0	0	0	0	0	0	0	0	0	0		2			2
579	2019-02-27 15:29:12	akebede@clintonhealthaccess.org	2019-02-02	Abebe kebede		chai		4	401	4003	61139	13/2/11	13/2/11	9	no admission	1	6	2	2	7	9	9	52	A B	1	1	0	0	0	0	0	0	0	0	0	0	0	0	0	0	0		2			2
580	2019-02-27 15:32:08	akebede@clintonhealthaccess.org	2019-02-02	Abebe kebede		chai		4	401	4003	54654	14/2/11	14/2/11	9	no admission	2	15	3	2	12	9	37	40	A B	1	1	0	0	0	0	0	0	0	0	0	0	0	0	0	0	0		2			2
581	2019-02-27 15:34:56	akebede@clintonhealthaccess.org	2019-02-02	Abebe kebede		chai		4	401	4003	61607	14/2/11	14/2/11	9	no admission	1	3	2	2	6	9	37	53	A B	1	1	0	0	0	0	0	0	0	0	0	0	0	0	0	0	0		2			2
582	2019-02-27 15:37:33	akebede@clintonhealthaccess.org	2019-02-02	Abebe kebede		chai		4	401	4003	59165	14/2/11	14/2/11	9	no admission	1	6	2	2	7	9	37	53	A B	1	1	0	0	0	0	0	0	0	0	0	0	0	0	0	0	0		2			2
583	2019-02-27 15:41:02	akebede@clintonhealthaccess.org	2019-02-02	Abebe kebede		chai		4	401	4003	63699	15/2/11	15/2/11	9	no admission	2	17	3	1	11	9	37	47	A B	1	1	0	0	0	0	0	0	0	0	0	0	0	0	0	0	0		2			2
584	2019-02-27 15:44:21	akebede@clintonhealthaccess.org	2019-02-02	Abebe kebede		chai		4	401	4003	56521	15/2/11	15/2/11	9	no admission	2	12	3	1	10	9	37	40	A B	1	1	0	0	0	0	0	0	0	0	0	0	0	0	0	0	0		2			2
585	2019-02-27 15:46:58	akebede@clintonhealthaccess.org	2019-02-02	Abebe kebede		chai		4	401	4003	58798	15/2/11	15/2/11	9	no admission	2	15	3	1	10	9	38	42	A B	1	1	0	0	0	0	0	0	0	0	0	0	0	0	0	0	0		2			2
586	2019-02-27 15:49:45	akebede@clintonhealthaccess.org	2019-02-02	Abebe kebede		chai		4	401	4003	59138	15/2/11	15/2/11	9	no admission	3	26	3	2	10	9	37	56	A B	1	1	0	0	0	0	0	0	0	0	0	0	0	0	0	0	0		2			2
587	2019-02-27 15:53:15	akebede@clintonhealthaccess.org	2019-02-02	Abebe kebede		chai		4	401	4003	58114	16/2/11	16/2/11	9	no admission	1	9	2	2	4.8	9	37	52	A B	1	1	0	0	0	0	0	0	0	0	0	0	0	0	0	0	0		2			2
588	2019-02-27 15:55:42	akebede@clintonhealthaccess.org	2019-02-02	Abebe kebede		chai		4	401	4003	62859	16/2/11	16/2/11	9	no admission	4	42	3	2	15	9	37	40	A B	1	1	0	0	0	0	0	0	0	0	0	0	0	0	0	0	0		2			2
589	2019-02-27 15:58:24	akebede@clintonhealthaccess.org	2019-02-02	Abebe kebede		chai		4	401	4003	60146	19/2/11	19/2/11	9	no admission	1	6	2	1	7	9	37	50	A B	1	1	0	0	0	0	0	0	0	0	0	0	0	0	0	0	0		2			2
590	2019-02-27 16:01:39	akebede@clintonhealthaccess.org	2019-02-02	Abebe kebede		chai		4	401	4003	51160	20/2/11	20/2/11	9	no admission	3	24	3	2	9	9	37	999	A C	1	0	1	0	0	0	0	0	0	0	0	0	0	0	0	0	0		2			2
591	2019-02-27 16:02:23	ayaregal@clintonhealthaccess.org	2019-01-30	Tafese		CHAI		2	202	2002	82297	16/4/11Ec	16/4/11Ec	3		2	13	3	1	9.8	74	38.8	52	A G	1	0	0	0	0	0	1	0	0	0	0	0	0	0	0	0	0		2			2
592	2019-02-27 16:02:30	ayaregal@clintonhealthaccess.org	2019-01-30	Tafese		CHAI		2	202	2002	82536	18/4/11Ec	18/4/11Ec	3		1	11	2	2	9.2	72	38.7	56	A G	1	0	0	0	0	0	1	0	0	0	0	0	0	0	0	0	0		2			2
593	2019-02-27 16:02:31	ayaregal@clintonhealthaccess.org	2019-01-30	Tafese		CHAI		2	202	2002	57399	19/4/11Ec	19/4/11Ec	3		5	54	3	1	14.6	90	37.5	49	A G	1	0	0	0	0	0	1	0	0	0	0	0	0	0	0	0	0		2			2
594	2019-02-27 16:02:31	ayaregal@clintonhealthaccess.org	2019-01-30	Tafese		CHAI		2	202	2002	76010	19/4/11Ec	19/4/11Ec	3		2	20	3	1	10.9	78	37.7	44	A G	1	0	0	0	0	0	1	0	0	0	0	0	0	0	0	0	0		2			2
595	2019-02-27 16:02:32	ayaregal@clintonhealthaccess.org	2019-01-30	Tafese		CHAI		2	202	2002	68804	24/4/11Ec	24/4/11Ec	10		3	30	3	1	11	9	9	999	A D G	1	0	0	1	0	0	1	0	0	0	0	0	0	0	0	0	0		2			2
596	2019-02-27 16:02:32	ayaregal@clintonhealthaccess.org	2019-01-30	Tafese		CHAI		2	202	2002	62994	30/4/11Ec	30/4/11Ec	3		4	41	3	2	13.8	86	37.1	47	A G	1	0	0	0	0	0	1	0	0	0	0	0	0	0	0	0	0		2			2
597	2019-02-27 16:02:33	ayaregal@clintonhealthaccess.org	2019-01-30	Tafese		CHAI		2	202	2002	43717	30/4/11Ec	30/4/11Ec	3		5	58	3	2	15.8	9	37.5	51	A G	1	0	0	0	0	0	1	0	0	0	0	0	0	0	0	0	0		2			2
598	2019-02-27 16:02:33	ayaregal@clintonhealthaccess.org	2019-01-30	Tafese		CHAI		2	202	2002	44727	30/4/11Ec	30/4/11Ec	3		5	52	3	2	14.9	98	37.1	44	A	1	0	0	0	0	0	0	0	0	0	0	0	0	0	0	0	0		2			2
599	2019-02-27 16:02:34	ayaregal@clintonhealthaccess.org	2019-01-30	Tafese		CHAI		2	202	2002	84309	30/4/11Ec	30/4/11Ec	3		1	8	2	1	9.1	69	37.4	55	A G	1	0	0	0	0	0	1	0	0	0	0	0	0	0	0	0	0		2			2
600	2019-02-27 16:02:34	ayaregal@clintonhealthaccess.org	2019-01-30	Tafese		CHAI		2	202	2002	89764	28/3/11Ec	28/3/11Ec	3		1	8	2	1	8.9	69	36.8	54	A G	1	0	0	0	0	0	1	0	0	0	0	0	0	0	0	0	0		2			2
601	2019-02-27 16:02:35	ayaregal@clintonhealthaccess.org	2019-01-30	Tafese		CHAI		2	202	2002	40904	28/3/11Ec	28/3/11Ec	3		5	54	3	2	14.8	9	36.7	48	A G	1	0	0	0	0	0	1	0	0	0	0	0	0	0	0	0	0		2			2
602	2019-02-27 16:02:36	ayaregal@clintonhealthaccess.org	2019-01-30	Tafese		CHAI		2	202	2002	83835	28/3/11Ec	28/3/11Ec	3		2	13	3	1	9.7	76	36.8	46	A G	1	0	0	0	0	0	1	0	0	0	0	0	0	0	0	0	0		2			2
603	2019-02-27 16:02:38	ayaregal@clintonhealthaccess.org	2019-01-30	Tafese		CHAI		2	202	2002	67652	28/3/11Ec	28/3/11Ec	3		3	29	3	2	12.8	80	37.5	44	A G	1	0	0	0	0	0	1	0	0	0	0	0	0	0	0	0	0		2			2
604	2019-02-27 16:02:38	ayaregal@clintonhealthaccess.org	2019-01-30	Tafese		CHAI		2	202	2002	88104	28/3/11Ec	28/3/11Ec	3		4	40	3	1	13.3	89	37.7	49	A G	1	0	0	0	0	0	1	0	0	0	0	0	0	0	0	0	0		2			2
605	2019-02-27 16:02:39	ayaregal@clintonhealthaccess.org	2019-01-30	Tafese		CHAI		2	202	2002	80746	1/4/11Ec	1/4/11Ec	3		2	21	3	1	10.8	77	37.5	46	A G	1	0	0	0	0	0	1	0	0	0	0	0	0	0	0	0	0		2			2
606	2019-02-27 16:02:39	ayaregal@clintonhealthaccess.org	2019-01-30	Tafese		CHAI		2	202	2002	80563	1/4/11Ec	1/4/11Ec	3		2	14	3	1	10.1	75	37.3	43	A G	1	0	0	0	0	0	1	0	0	0	0	0	0	0	0	0	0		2			2
607	2019-02-27 16:02:40	ayaregal@clintonhealthaccess.org	2019-01-30	Tafese		CHAI		2	202	2002	87836	1/4/11Ec	1/4/11Ec	3		1	3	2	2	6.2	58	37.6	59	A G	1	0	0	0	0	0	1	0	0	0	0	0	0	0	0	0	0		2			2
608	2019-02-27 16:02:40	ayaregal@clintonhealthaccess.org	2019-01-30	Tafese		CHAI		2	202	2002	83179	3/4/11Ec	3/4/11Ec	3		3	24	3	1	10.5	9	38	52	A G	1	0	0	0	0	0	1	0	0	0	0	0	0	0	0	0	0		2			2
609	2019-02-27 16:05:21	akebede@clintonhealthaccess.org	2019-02-02	Abebe kebede		chai		4	401	4003	63855	20/2/11	20/2/11	9	no admission	4	36	3	1	15	9	37	40	A B	1	1	0	0	0	0	0	0	0	0	0	0	0	0	0	0	0		2			2
610	2019-02-27 16:06:29	ayaregal@clintonhealthaccess.org	2019-01-30	Tafese		CHAI		2	202	2002	53164	17/4/11Ec	17/4/11Ec	3		5	48	3	1	15	89	36.9	44	A G	1	0	0	0	0	0	1	0	0	0	0	0	0	0	0	0	0		2			2
611	2019-02-27 16:08:03	akebede@clintonhealthaccess.org	2019-02-02	Abebe kebede		chai		4	401	4003	63870	21/2/11	21/2/11	9	no admission	4	46	3	1	15	9	37	40	A B	1	1	0	0	0	0	0	0	0	0	0	0	0	0	0	0	0		2			2
612	2019-02-27 16:08:46	ayaregal@clintonhealthaccess.org	2019-01-30	Tafese		CHAI		2	202	2002	43429	16/4/11Ec	16/4/11Ec	3		5	54	3	1	14.8	96	37.3	43	A G	1	0	0	0	0	0	1	0	0	0	0	0	0	0	0	0	0		2			2
613	2019-02-27 16:10:44	akebede@clintonhealthaccess.org	2019-02-02	Abebe kebede		chai		4	401	4003	59018	21/2/11	21/2/11	9	no admission	1	7	2	2	6.5	9	37	53	A B	1	1	0	0	0	0	0	0	0	0	0	0	0	0	0	0	0		2			2
614	2019-02-27 16:13:37	akebede@clintonhealthaccess.org	2019-02-02	Abebe kebede		chai		4	401	4003	63894	21/2/11	21/2/11	9	no admission	5	52	3	1	16	9	37	40	A B	1	1	0	0	0	0	0	0	0	0	0	0	0	0	0	0	0		2			2
615	2019-02-27 16:16:38	akebede@clintonhealthaccess.org	2019-02-02	Abebe kebede		chai		4	401	4003	61789	21/2/11	21/2/11	9	no admission	1	3	2	1	6	9	37	57	A B	1	1	0	0	0	0	0	0	0	0	0	0	0	0	0	0	0		2			2
616	2019-02-27 16:19:43	akebede@clintonhealthaccess.org	2019-02-02	Abebe kebede		chai		4	401	4003	55224	22/2/11	2011-02-02	9	no admission	2	15	3	2	10	9	37	57	A B	1	1	0	0	0	0	0	0	0	0	0	0	0	0	0	0	0		2			2
617	2019-02-27 16:22:43	akebede@clintonhealthaccess.org	2019-02-02	Abebe kebede		chai		4	401	4003	60951	22/2/11	22/2/11	9	no admission	1	4	2	1	7.5	9	37	56	A B	1	1	0	0	0	0	0	0	0	0	0	0	0	0	0	0	0		2			2
618	2019-02-27 16:27:02	akebede@clintonhealthaccess.org	2019-02-02	Abebe kebede		chai		4	401	4003	63925	22/2/11	22/2/11	9	no admission	2	14	3	2	10	9	37	40	A B	1	1	0	0	0	0	0	0	0	0	0	0	0	0	0	0	0		2			2
619	2019-02-27 16:31:50	akebede@clintonhealthaccess.org	2019-02-02	Abebe kebede		chai		4	401	4003	57927	22/2/22	22/2/11	9	no admission	1	9	2	1	9.5	9	37	52	A B	1	1	0	0	0	0	0	0	0	0	0	0	0	0	0	0	0		2			2
620	2019-02-27 16:33:04	ayaregal@clintonhealthaccess.org	2019-01-30	Tafese		CHAI		2	202	2002	75980	9/4/11Ec	9/4/11Ec	3		2	20	3	2	10.2	80	36.9	49	A G	1	0	0	0	0	0	1	0	0	0	0	0	0	0	0	0	0		2			2
621	2019-02-27 16:33:06	ayaregal@clintonhealthaccess.org	2019-01-30	Tafese		CHAI		2	202	2002	75512	9/4/11Ec	9/4/11Ec	3		2	19	3	1	10.5	81	37.6	42	A G	1	0	0	0	0	0	1	0	0	0	0	0	0	0	0	0	0		2			2
622	2019-02-27 16:33:06	ayaregal@clintonhealthaccess.org	2019-01-30	Tafese		CHAI		2	202	2002	84611	25/3/11Ec	25/3/11Ec	3		1	6	2	1	8.6	66	36.5	54	A D G	1	0	0	1	0	0	1	0	0	0	0	0	0	0	0	0	0		2			2
623	2019-02-27 16:33:08	ayaregal@clintonhealthaccess.org	2019-01-30	Tafese		CHAI		2	202	2002	75281	25/3/11Ec	25/3/11Ec	3		3	25	3	2	12.1	86	36.6	47	A G	1	0	0	0	0	0	1	0	0	0	0	0	0	0	0	0	0		2			2
624	2019-02-27 16:33:08	ayaregal@clintonhealthaccess.org	2019-01-30	Tafese		CHAI		2	202	2002	82097	27/3/11Ec	27/3/11Ec	3		2	12	3	2	9.9	75	37.8	47	A G	1	0	0	0	0	0	1	0	0	0	0	0	0	0	0	0	0		2			2
625	2019-02-27 16:33:10	ayaregal@clintonhealthaccess.org	2019-01-30	Tafese		CHAI		2	202	2002	40246	24/3/11Ec	24/3/11Ec	3		5	59	3	2	15.6	104	37.7	49	A G	1	0	0	0	0	0	1	0	0	0	0	0	0	0	0	0	0		2			2
626	2019-02-27 16:35:01	akebede@clintonhealthaccess.org	2019-02-02	Abebe kebede		chai		4	401	4003	62393	23/2/11	23/2/11	9	no admission	1	3	2	1	6	9	37	52	A B	1	1	0	0	0	0	0	0	0	0	0	0	0	0	0	0	0		2			2
627	2019-02-27 16:37:45	akebede@clintonhealthaccess.org	2019-02-02	Abebe kebede		chai		4	401	4003	61332	23/2/11	23/2/11	9	no admission	1	5	2	1	8.5	9	37	50	A B	1	1	0	0	0	0	0	0	0	0	0	0	0	0	0	0	0		2			2
628	2019-02-27 16:40:48	akebede@clintonhealthaccess.org	2019-02-02	Abebe kebede		chai		4	401	4003	58966	23/2/11	23/2/11	9	no admission	1	8	2	1	7.5	9	37.2	57	A B	1	1	0	0	0	0	0	0	0	0	0	0	0	0	0	0	0		2			2
629	2019-02-27 16:43:52	akebede@clintonhealthaccess.org	2019-02-02	Abebe kebede		chai		4	401	4003	61920	23/2/11	23/2/11	9	no admission	1	9	2	2	7.5	9	9	50	A B	1	1	0	0	0	0	0	0	0	0	0	0	0	0	0	0	0		2			2
630	2019-02-27 16:48:34	akebede@clintonhealthaccess.org	2019-02-02	Abebe kebede		chai		4	401	4003	58997	26/2/11	26/2/11	9	no admission	1	9	2	1	7	9	37.2	53	A B	1	1	0	0	0	0	0	0	0	0	0	0	0	0	0	0	0		2			2
631	2019-02-27 16:52:19	akebede@clintonhealthaccess.org	2019-02-02	Abebe kebede		chai		4	401	4003	59704	26/2/11	26/2/11	9	no admission	1	7	2	1	7.5	9	37	52	A B	1	1	0	0	0	0	0	0	0	0	0	0	0	0	0	0	0		2			2
632	2019-02-27 16:55:41	akebede@clintonhealthaccess.org	2019-02-02	Abebe kebede		chai		4	401	4003	55904	26/2/11	26/2/11	9	no admission	2	15	3	2	10	9	37	43	A B	1	1	0	0	0	0	0	0	0	0	0	0	0	0	0	0	0		2			2
633	2019-02-27 16:58:21	akebede@clintonhealthaccess.org	2019-02-02	Abebe kebede		chai		4	401	4003	64083	27/2/11	27/2/11	9	no admission	1	7	2	2	6	9	36.4	999	A B	1	1	0	0	0	0	0	0	0	0	0	0	0	0	0	0	0		2			2
634	2019-02-27 17:01:19	akebede@clintonhealthaccess.org	2019-02-02	Abebe kebede		chai		4	401	4003	64078	27/2/11	27/2/11	9	no admission	3	24	3	2	10	9	37.6	999	A B	1	1	0	0	0	0	0	0	0	0	0	0	0	0	0	0	0		2			2
635	2019-02-27 20:50:28	ttumbule@clintonhealthaccess.org	2019-01-30	Tegegn Chote		CHAI		3	302	3003	06212/11	18/4/11	9	10		2	14	3	2	9	65	36.9	40	A B D	1	1	0	1	0	0	0	0	0	0	0	0	0	0	0	0	0		2			2
636	2019-02-27 20:54:41	ttumbule@clintonhealthaccess.org	2019-01-30	Tegegn Chote		CHAI		3	302	3003	05699/11	2011-10-04	9	10		2	19	3	1	9.9	78	35.5	42	A B G	1	1	0	0	0	0	1	0	0	0	0	0	0	0	0	0	0		2			2
637	2019-02-27 20:57:49	ttumbule@clintonhealthaccess.org	2019-01-30	Tegegn Chote		CHAI		3	302	3003	14337/10	2011-10-04	9	10		5	48	3	1	14.8	98	36.6	49	A B D G	1	1	0	1	0	0	1	0	0	0	0	0	0	0	0	0	0		2			2
638	2019-02-27 21:00:42	ttumbule@clintonhealthaccess.org	2019-01-30	Tegegn Chote		CHAI		3	302	3003	05645/11	2011-09-04	9	10		3	27	3	2	13	71	39.3	48	A G	1	0	0	0	0	0	1	0	0	0	0	0	0	0	0	0	0		2			2
639	2019-02-27 21:03:53	ttumbule@clintonhealthaccess.org	2019-01-30	Tegegn Chote		CHAI		3	302	3003	15974/10	2011-09-04	9	10		2	19	3	2	11	70	37.5	44	A B G	1	1	0	0	0	0	1	0	0	0	0	0	0	0	0	0	0		2			2
640	2019-02-27 21:06:48	ttumbule@clintonhealthaccess.org	2019-01-30	Tegegn Chote		CHAI		3	302	3003	05632/11	2011-09-04	9	10		5	52	3	2	14	90	36.5	42	A B D	1	1	0	1	0	0	0	0	0	0	0	0	0	0	0	0	0		2			2
641	2019-02-27 21:09:36	ttumbule@clintonhealthaccess.org	2019-01-30	Tegegn Chote		CHAI		3	302	3003	05607/11	2011-08-04	9	10		4	42	3	2	15	92	36.5	49	A B D G	1	1	0	1	0	0	1	0	0	0	0	0	0	0	0	0	0		2			2
642	2019-02-27 21:12:10	ttumbule@clintonhealthaccess.org	2019-01-30	Tegegn Chote		CHAI		3	302	3003	17900/10	2011-08-04	9	10		1	10	2	2	8.5	64	37.3	52	A B G	1	1	0	0	0	0	1	0	0	0	0	0	0	0	0	0	0		2			2
643	2019-02-27 21:15:01	ttumbule@clintonhealthaccess.org	2019-01-30	Tegegn Chote		CHAI		3	302	3003	00460/9	2011-08-04	9	10		3	34	3	1	15	82	36.8	41	A B	1	1	0	0	0	0	0	0	0	0	0	0	0	0	0	0	0		2			2
644	2019-02-27 21:18:12	ttumbule@clintonhealthaccess.org	2019-01-30	Tegegn Chote		CHAI		3	302	3003	05538/11	2011-08-04	9	10		3	36	3	2	17	85	36.5	48	A B O	1	1	0	0	0	0	0	0	0	0	0	0	0	0	1	0	0		2			2
645	2019-02-27 21:25:23	ttumbule@clintonhealthaccess.org	2019-01-30	Tegegn Chote		CHAI		3	302	3003	05519/11	2011-08-04	9	10		5	48	3	1	17	82	36.5	48	A B	1	1	0	0	0	0	0	0	0	0	0	0	0	0	0	0	0		2			2
646	2019-02-27 21:46:17	ttumbule@clintonhealthaccess.org	2019-01-30	Tegegn chote		CHAI		3	302	3003	02566/11	2011-05-04	9	10		1	11	2	1	10	71	37	58	A B	1	1	0	0	0	0	0	0	0	0	0	0	0	0	0	0	0		2			2
647	2019-02-27 21:49:35	ttumbule@clintonhealthaccess.org	2019-01-30	Tegegn chote		CHAI		3	302	3003	02559/11	2011-04-04	9	10		4	45	3	2	14	85	36.5	42	A B G K	1	1	0	0	0	0	1	0	0	0	1	0	0	0	0	0	0		2			2
648	2019-02-27 21:52:52	ttumbule@clintonhealthaccess.org	2019-01-30	Tegegn Chote		CHAI		3	302	3003	12295/10	2011-04-04	9	10		5	53	3	2	17	92	37	37	A N	1	0	0	0	0	0	0	0	0	0	0	0	0	1	0	0	0		2			2
649	2019-02-27 21:57:06	ttumbule@clintonhealthaccess.org	2019-01-30	Tegegn Chote		CHAI		3	302	3003	11766/11	2011-03-04	9	10		2	12	3	1	11	9	35.5	41	A B G	1	1	0	0	0	0	1	0	0	0	0	0	0	0	0	0	0		2			2
650	2019-02-27 21:59:59	ttumbule@clintonhealthaccess.org	2019-01-30	Tegegn Chote		CHAI		3	302	3003	0531/10	2011-03-04	9	10		1	3	2	1	4.5	9	39.5	42	A C G	1	0	1	0	0	0	1	0	0	0	0	0	0	0	0	0	0		2			2
651	2019-02-27 22:03:01	ttumbule@clintonhealthaccess.org	2019-01-30	Tegegn Chote		CHAI		3	302	3003	9	2011-07-02	9	10		3	31	3	2	11	9	37.5	51	A G	1	0	0	0	0	0	1	0	0	0	0	0	0	0	0	0	0		2			2
652	2019-02-27 22:06:23	ttumbule@clintonhealthaccess.org	2019-01-30	Tegegn Chote		CHAI		3	302	3003	9	2011-07-02	9	10		1	2	2	1	5.7	9	36.5	58	A B	1	1	0	0	0	0	0	0	0	0	0	0	0	0	0	0	0		2			2
653	2019-02-27 22:10:29	ttumbule@clintonhealthaccess.org	2019-01-30	Tegegn Chote		CHAI		3	302	3003	9	2011-07-02	9	10		2	12	3	1	9	9	37.1	56	A E G	1	0	0	0	1	0	1	0	0	0	0	0	0	0	0	0	0		2			2
654	2019-02-27 22:13:31	ttumbule@clintonhealthaccess.org	2019-01-30	Tegegn Chote		CHAI		3	302	3003	9	2011-07-02	9	10		1	4	2	2	7.4	9	35.4	63	A B	1	1	0	0	0	0	0	0	0	0	0	0	0	0	0	0	0		2			2
655	2019-02-27 22:16:05	ttumbule@clintonhealthaccess.org	2019-01-30	Tegegn Chote		CHAI		3	302	3003	9	2011-07-02	9	10		2	15	3	1	32	9	35	46	A	1	0	0	0	0	0	0	0	0	0	0	0	0	0	0	0	0		2			2
656	2019-02-27 22:18:41	ttumbule@clintonhealthaccess.org	2019-01-30	Tegegn Chote		CHAI		3	302	3003	9	2011-06-02	9	10		4	41	3	1	15	9	36	40	A B D	1	1	0	1	0	0	0	0	0	0	0	0	0	0	0	0	0		2			2
657	2019-02-27 22:21:21	ttumbule@clintonhealthaccess.org	2019-01-30	Tegegn Chote		CHAI		3	302	3003	9	2011-05-02	9	10		1	6	2	2	7.5	9	37	51	A B	1	1	0	0	0	0	0	0	0	0	0	0	0	0	0	0	0		2			2
658	2019-02-27 22:23:57	ttumbule@clintonhealthaccess.org	2019-01-30	Tegegn Chote		CHAI		3	302	3003	9	2011-05-02	9	10		1	7	2	1	8.3	9	35.6	50	A B G	1	1	0	0	0	0	1	0	0	0	0	0	0	0	0	0	0		2			2
659	2019-02-27 22:26:32	ttumbule@clintonhealthaccess.org	2019-01-29	Tegegn Chote		CHAI		3	302	3003	9	2011-05-02	9	10		2	17	3	1	11	9	36.5	51	A B	1	1	0	0	0	0	0	0	0	0	0	0	0	0	0	0	0		2			2
660	2019-02-27 22:29:08	ttumbule@clintonhealthaccess.org	2019-01-30	Tegegn Chote		CHAI		3	302	3003	9	2011-05-02	9	10		1	9	2	1	8.3	9	35.1	80	A B	1	1	0	0	0	0	0	0	0	0	0	0	0	0	0	0	0		2			2
661	2019-02-27 22:31:27	ttumbule@clintonhealthaccess.org	2019-01-30	Tegegn Chote		CHAI		3	302	3003	9	2011-05-02	9	10		1	8	2	2	8	9	37	55	A B	1	1	0	0	0	0	0	0	0	0	0	0	0	0	0	0	0		2			2
662	2019-02-27 22:34:54	ttumbule@clintonhealthaccess.org	2019-01-29	Tegegn Chote		CHAI		3	302	3003	9	2011-02-02	9	10		1	3	2	2	9.3	9	36	61	A B G	1	1	0	0	0	0	1	0	0	0	0	0	0	0	0	0	0		2			2
663	2019-02-28 06:59:22	ttumbule@clintonhealthaccess.org	2019-01-30	Tegegn Chote		CHAI		3	302	3003	9	2011-02-02	9	10		1	7	2	1	9.5	9	38.3	58	A B	1	1	0	0	0	0	0	0	0	0	0	0	0	0	0	0	0		2			2
664	2019-02-28 07:03:38	ttumbule@clintonhealthaccess.org	2019-01-30	Tegegn Chote		CHAI		3	302	3003	9	2011-02-02	9	10		1	2	2	1	6.2	9	36	62	A B G	1	1	0	0	0	0	1	0	0	0	0	0	0	0	0	0	0		2			2
665	2019-02-28 07:06:56	ttumbule@clintonhealthaccess.org	2019-01-30	Tegegn Chote		CHAI		3	302	3003	9	2011-03-02	9	10		2	15	3	2	7	10	37	50	A B G	1	1	0	0	0	0	1	0	0	0	0	0	0	0	0	0	0		2			2
666	2019-02-28 07:10:01	ttumbule@clintonhealthaccess.org	2019-01-30	Tegegn Chote		CHAI		3	302	3003	9	2011-02-05	9	10		2	13	3	2	6	9	36.5	50	A D G	1	0	0	1	0	0	1	0	0	0	0	0	0	0	0	0	0		2			2
667	2019-02-28 07:12:46	ttumbule@clintonhealthaccess.org	2019-01-30	Tegegn Chote		CHAI		3	302	3003	9	2011-02-22	9	10		1	5	2	2	7	8	36	60	A B E G	1	1	0	0	1	0	1	0	0	0	0	0	0	0	0	0	0		2			2
668	2019-02-28 07:15:36	ttumbule@clintonhealthaccess.org	2019-01-30	Tegegn Chote		CHAI		3	302	3003	9	2011-02-20	9	10		1	7	2	2	6	8	37	62	A B G	1	1	0	0	0	0	1	0	0	0	0	0	0	0	0	0	0		2			2
669	2019-02-28 07:18:58	ttumbule@clintonhealthaccess.org	2019-01-30	Tegegn Chote		CHAI		3	302	3003	9	2011-02-08	9	10		1	3	2	2	5	10	37	62	A B G	1	1	0	0	0	0	1	0	0	0	0	0	0	0	0	0	0		2			2
670	2019-02-28 08:06:25	ayaregal@clintonhealthaccess.org	2019-01-30	Tafese		CHAI		2	202	2002	59055	24/3/11Ec	24/3/11Ec	3		4	40	3	2	13.4	86	36	47	A G	1	0	0	0	0	0	1	0	0	0	0	0	0	0	0	0	0		2			2
671	2019-02-28 08:06:26	ayaregal@clintonhealthaccess.org	2019-01-30	Tafese		CHAI		2	202	2002	73188	24/3/11Ec	24/3/11Ec	3		2	23	3	1	11.2	83	37.2	46	A G	1	0	0	0	0	0	1	0	0	0	0	0	0	0	0	0	0		2			2
672	2019-02-28 08:06:26	ayaregal@clintonhealthaccess.org	2019-01-30	Tafese		CHAI		2	202	2002	82536	24/3/11Ec	24/3/11Ec	3		1	11	2	1	9.4	72	38.7	59	A G	1	0	0	0	0	0	1	0	0	0	0	0	0	0	0	0	0		2			2
673	2019-02-28 08:06:27	ayaregal@clintonhealthaccess.org	2019-01-30	Tafese		CHAI		2	202	2002	82820	24/3/11Ec	24/3/11Ec	3		1	9	2	2	8.8	70	37.1	57	A G	1	0	0	0	0	0	1	0	0	0	0	0	0	0	0	0	0		2			2
674	2019-02-28 08:06:27	ayaregal@clintonhealthaccess.org	2019-01-30	Tafese		CHAI		2	202	2002	67644	19/3/11Ec	19/3/11Ec	3		4	36	3	2	12.3	82	36.1	82	A	1	0	0	0	0	0	0	0	0	0	0	0	0	0	0	0	0		2			2
675	2019-02-28 08:06:28	ayaregal@clintonhealthaccess.org	2019-01-30	Tafese		CHAI		2	202	2002	84505	17/3/11Ec	17/3/11Ec	3		5	51	3	2	14.5	92	37.2	49	A G	1	0	0	0	0	0	1	0	0	0	0	0	0	0	0	0	0		2			2
676	2019-02-28 08:06:28	ayaregal@clintonhealthaccess.org	2019-01-30	Tafese		CHAI		2	202	2002	67644	17/3/11Ec	17/3/11Ec	3		3	32	3	2	12.3	81	38.8	51	A G	1	0	0	0	0	0	1	0	0	0	0	0	0	0	0	0	0		2			2
677	2019-02-28 08:06:29	ayaregal@clintonhealthaccess.org	2019-01-30	Tafese		CHAI		2	202	2002	65155	27/3/11Ec	27/3/11Ec	3		4	37	3	1	13.1	89	36.8	48	A G	1	0	0	0	0	0	1	0	0	0	0	0	0	0	0	0	0		2			2
678	2019-02-28 08:06:29	ayaregal@clintonhealthaccess.org	2019-01-30	Tafese		CHAI		2	202	2002	79929	27/3/11Ec	27/3/11Ec	3		2	15	3	2	9.8	76	36.7	45	A G	1	0	0	0	0	0	1	0	0	0	0	0	0	0	0	0	0		2			2
679	2019-02-28 08:06:30	ayaregal@clintonhealthaccess.org	2019-01-30	Tafese		CHAI		2	202	2002	53135	27/3/11Ec	27/3/11Ec	3		4	42	3	2	13.1	88	37.5	46	A G	1	0	0	0	0	0	1	0	0	0	0	0	0	0	0	0	0		2			2
680	2019-02-28 09:03:19	akebede@clintonhealthaccess.org	2019-02-02	Abebe kebede		chai		4	401	4003	44427	28/2/11	28/2/11	9	no admission	2	14	3	2	10	9	36	999	A B	1	1	0	0	0	0	0	0	0	0	0	0	0	0	0	0	0		2			2
681	2019-02-28 09:06:47	akebede@clintonhealthaccess.org	2019-02-02	Abebe kebede		58351		4	401	4003	58351	28/2/11	28/2/11	9	no admission	1	10	2	1	9	9	37	51	A B	1	1	0	0	0	0	0	0	0	0	0	0	0	0	0	0	0		2			2
682	2019-02-28 09:10:40	akebede@clintonhealthaccess.org	2019-02-02	Abebe kebede		chai		4	401	4003	61697	29/2/11	29/2/11	9	no admission	1	9	2	1	99	9	37	51	A B	1	1	0	0	0	0	0	0	0	0	0	0	0	0	0	0	0		2			2
683	2019-02-28 09:14:15	akebede@clintonhealthaccess.org	2019-02-02	Abebe kebede		chai		4	401	4003	64143	29/2/11	29/2/11	9	no admission	1	10	2	1	7.5	9	37.2	52	A B	1	1	0	0	0	0	0	0	0	0	0	0	0	0	0	0	0		2			2
684	2019-02-28 09:17:49	akebede@clintonhealthaccess.org	2019-02-02	Abebe kebede		chai		4	401	4003	62319	29/2/11	29/2/11	9	no admission	1	2	2	1	6.5	9	37	53	A	1	0	0	0	0	0	0	0	0	0	0	0	0	0	0	0	0		2			2
685	2019-02-28 09:24:35	akebede@clintonhealthaccess.org	2019-02-02	Abebe kebede		chai		4	401	4003	59703	30/2/11	30/2/11	9	no admission	1	5	2	1	99	9	37	50	A B	1	1	0	0	0	0	0	0	0	0	0	0	0	0	0	0	0		2			2
686	2019-02-28 09:29:15	akebede@clintonhealthaccess.org	2019-02-02	Abebe kebede		chai		4	401	4003	61728	30/2/11	30/2/11	9	no admission	1	3	2	1	7	9	37	50	A B	1	1	0	0	0	0	0	0	0	0	0	0	0	0	0	0	0		2			2
687	2019-02-28 09:33:08	akebede@clintonhealthaccess.org	2019-02-02	Abebe kebede		chai		4	401	4003	64175	30/2/11	30/2/11	9	no admission	1	3	2	1	12	9	37	45	A B	1	1	0	0	0	0	0	0	0	0	0	0	0	0	0	0	0		2			2
688	2019-02-28 09:37:47	akebede@clintonhealthaccess.org	2019-02-02	Abebe kebede		chai		4	401	4003	91964	2011-03-03	2011-03-03	9	no admission	1	8	2	1	9	37	37	60	A B	1	1	0	0	0	0	0	0	0	0	0	0	0	0	0	0	0		2			2
689	2019-02-28 09:40:40	akebede@clintonhealthaccess.org	2019-02-02	Abebe kebede		chai		4	401	4003	60403	2011-03-03	2011-03-03	9	no admission	1	6	2	2	7	9	37	50	A B	1	1	0	0	0	0	0	0	0	0	0	0	0	0	0	0	0		2			2
690	2019-02-28 09:43:59	akebede@clintonhealthaccess.org	2019-02-02	Abebe kebede		chai		4	401	4003	64244	2011-03-03	2011-03-03	9	no admission	5	48	3	1	13	9	37	40	A B	1	1	0	0	0	0	0	0	0	0	0	0	0	0	0	0	0		2			2
691	2019-02-28 09:48:47	akebede@clintonhealthaccess.org	2019-02-02	Abebe kebede		chai		4	401	4003	57522	2011-04-03	2011-04-03	9	no admission	1	11	2	2	9.5	9	37.3	50	A B	1	1	0	0	0	0	0	0	0	0	0	0	0	0	0	0	0		2			2
692	2019-02-28 09:51:46	akebede@clintonhealthaccess.org	2019-02-02	Abebe kebede		chai		4	401	4003	53060	2011-04-03	2011-04-03	9	no admission	2	20	3	1	10	9	37	42	A B	1	1	0	0	0	0	0	0	0	0	0	0	0	0	0	0	0		2			2
693	2019-02-28 09:55:00	akebede@clintonhealthaccess.org	2019-02-02	Abebe kebede		chai		4	401	4003	58129	2011-05-03	/3/11	9	no admission	1	11	2	2	9	9	37	50	A B	1	1	0	0	0	0	0	0	0	0	0	0	0	0	0	0	0		2			2
694	2019-02-28 09:58:10	akebede@clintonhealthaccess.org	2019-02-02	Abebe kebede		chai		4	401	4003	38383	2011-05-03	2011-05-03	9	no admission	5	48	3	1	16	9	37	40	A B	1	1	0	0	0	0	0	0	0	0	0	0	0	0	0	0	0		2			2
695	2019-02-28 10:01:08	akebede@clintonhealthaccess.org	2019-02-02	Abebe kebede		chai		4	401	4003	59273	2011-05-03	2011-05-03	9	no admission	1	7	2	1	7.3	9	37	53	A B	1	1	0	0	0	0	0	0	0	0	0	0	0	0	0	0	0		2			2
696	2019-02-28 10:04:32	akebede@clintonhealthaccess.org	2019-02-02	Abebe kebede		chai		4	401	4003	43786	2011-05-03	2011-05-03	9	no admission	1	3	2	1	99	9	37.8	43	A B	1	1	0	0	0	0	0	0	0	0	0	0	0	0	0	0	0		2			2
697	2019-02-28 10:07:44	akebede@clintonhealthaccess.org	2019-02-02	Abebe kebede		chai		4	401	4003	48041	2011-05-03	2011-05-03	9	no admission	3	30	3	2	10	9	37.5	42	A B	1	1	0	0	0	0	0	0	0	0	0	0	0	0	0	0	0		2			2
698	2019-02-28 10:10:49	akebede@clintonhealthaccess.org	2019-02-02	Abebe kebede		chai		4	401	4003	58799	2011-05-03	2011-05-03	9	no admission	2	17	3	1	10	9	37	43	A B	1	1	0	0	0	0	0	0	0	0	0	0	0	0	0	0	0		2			2
699	2019-02-28 10:14:13	akebede@clintonhealthaccess.org	2019-02-02	Abebe kebede		chai		4	401	4003	56347	2011-05-03	2011-05-03	9	no admission	2	14	3	1	10	9	37.3	45	A B	1	1	0	0	0	0	0	0	0	0	0	0	0	0	0	0	0		2			2
700	2019-02-28 10:18:24	akebede@clintonhealthaccess.org	2019-02-02	Abebe kebede		chai		4	401	4003	57863	2011-05-03	2011-05-03	9	no admission	1	9	2	1	10	9	37	52	A B	1	1	0	0	0	0	0	0	0	0	0	0	0	0	0	0	0		2			2
701	2019-02-28 10:21:56	akebede@clintonhealthaccess.org	2019-02-02	Abebe kebede		chai		4	401	4003	64310	2011-05-03	2011-05-03	9	no admission	2	21	3	1	10	9	37.5	43	A B	1	1	0	0	0	0	0	0	0	0	0	0	0	0	0	0	0		2			2
702	2019-02-28 10:25:27	akebede@clintonhealthaccess.org	2019-02-02	Abebe kebede		chai		4	401	4003	64318	2011-06-03	2011-06-03	9	no admission	5	53	3	1	20	9	37	40	A B	1	1	0	0	0	0	0	0	0	0	0	0	0	0	0	0	0		2			2
703	2019-02-28 10:30:20	akebede@clintonhealthaccess.org	2019-02-02	Abebe kebede		chai		4	401	4003	62377	2011-06-03	2011-06-03	9	no admission	2	16	3	1	11.5	9	37	42	A B	1	1	0	0	0	0	0	0	0	0	0	0	0	0	0	0	0		2			2
704	2019-02-28 10:33:55	akebede@clintonhealthaccess.org	2019-02-02	Abebe kebede		chai		4	401	4003	64323	2011-06-03	2011-06-03	9	no admission	4	38	3	2	14	9	37	40	A B	1	1	0	0	0	0	0	0	0	0	0	0	0	0	0	0	0		2			2
705	2019-02-28 10:38:59	akebede@clintonhealthaccess.org	2019-02-02	Abebe kebede		chai		4	401	4003	61529	2011-06-03	2011-06-03	9	no admission	1	4	2	1	6	9	37	56	A B	1	1	0	0	0	0	0	0	0	0	0	0	0	0	0	0	0		2			2
706	2019-02-28 10:42:37	akebede@clintonhealthaccess.org	2019-02-02	Abebe kebede		chai		4	401	4003	64324	2011-06-03	2011-06-03	9	no admission	2	16	3	1	10	9	37	40	A B	1	1	0	0	0	0	0	0	0	0	0	0	0	0	0	0	0		2			2
707	2019-02-28 10:56:25	akebede@clintonhealthaccess.org	2019-02-02	Abebe kebede		chai		4	401	4003	59890	2011-06-03	2011-06-03	9	no admission	1	6	2	1	8	9	9	62	A B	1	1	0	0	0	0	0	0	0	0	0	0	0	0	0	0	0		2			2
708	2019-02-28 11:00:07	akebede@clintonhealthaccess.org	2019-02-02	Abebe kebede		Abebe kebede		4	401	4003	45064	2011-07-03	2011-07-03	9	no admission	3	35	3	1	12.5	9	37	47	A B	1	1	0	0	0	0	0	0	0	0	0	0	0	0	0	0	0		2			2
709	2019-02-28 11:03:48	akebede@clintonhealthaccess.org	2019-02-02	Abebe kebede		chai		4	401	4003	53955	2011-07-03	2011-07-03	9	no admission	4	36	3	1	15	9	37	42	A	1	0	0	0	0	0	0	0	0	0	0	0	0	0	0	0	0		2			2
710	2019-02-28 11:08:24	akebede@clintonhealthaccess.org	2019-02-02	Abebe kebede		chai		4	401	4003	57755	2011-07-03	2011-07-03	9	no admission	2	18	3	2	10	9	37	43	A B	1	1	0	0	0	0	0	0	0	0	0	0	0	0	0	0	0		2			2
711	2019-02-28 11:12:18	akebede@clintonhealthaccess.org	2019-02-02	Abebe kebede		chai		4	401	4003	58453	2011-10-03	2011-10-03	9	no admission	1	9	2	1	10	9	37	56	A B	1	1	0	0	0	0	0	0	0	0	0	0	0	0	0	0	0		2			2
712	2019-02-28 11:15:42	akebede@clintonhealthaccess.org	2019-02-02	Abebe kebede		chai		4	401	4003	58884	2011-10-03	2011-10-03	9	no admission	1	9	2	1	8	9	37.1	52	A B	1	1	0	0	0	0	0	0	0	0	0	0	0	0	0	0	0		2			2
713	2019-02-28 11:19:04	akebede@clintonhealthaccess.org	2019-02-02	Abebe kebede		chai		4	401	4003	54913	2011-10-03	2011-10-03	9	no admission	2	17	3	2	10	9	37.3	40	A B	1	1	0	0	0	0	0	0	0	0	0	0	0	0	0	0	0		2			2
714	2019-02-28 11:23:01	akebede@clintonhealthaccess.org	2019-02-02	Abebe kebede		chai		4	401	4003	40560	2011-10-03	2011-10-03	9	no admission	4	42	3	1	15	9	37	40	A B	1	1	0	0	0	0	0	0	0	0	0	0	0	0	0	0	0		2			2
715	2019-02-28 11:26:08	akebede@clintonhealthaccess.org	2019-02-02	Abebe kebede		chai		4	401	4003	44981	2011-10-03	2011-10-03	9	no admission	4	37	3	1	15	9	37	41	A B	1	1	0	0	0	0	0	0	0	0	0	0	0	0	0	0	0		2			2
716	2019-02-28 11:29:16	akebede@clintonhealthaccess.org	2019-02-02	Abebe kebede		chai		4	401	4003	59173	2011-10-03	2011-10-03	9	no admission	1	8	2	2	7	9	9	50	A B	1	1	0	0	0	0	0	0	0	0	0	0	0	0	0	0	0		2			2
717	2019-02-28 11:33:43	akebede@clintonhealthaccess.org	2019-02-02	Abebe kebede		chai		4	401	4003	62257	2011-12-03	2011-12-03	9	no admission	1	3	2	1	6.5	9	37.1	53	A B	1	1	0	0	0	0	0	0	0	0	0	0	0	0	0	0	0		2			2
718	2019-02-28 11:37:08	akebede@clintonhealthaccess.org	2019-02-02	Abebe kebede		chai		4	401	4003	64453	2011-12-03	2011-12-03	9	no admission	2	19	3	1	10	9	37.8	46	A B	1	1	0	0	0	0	0	0	0	0	0	0	0	0	0	0	0		2			2
719	2019-02-28 11:42:31	akebede@clintonhealthaccess.org	2019-02-02	Abebe kebede		chai		4	401	4003	58207	2011-12-03	2011-12-03	9	no admission	1	9	2	1	8.5	9	37	57	A B	1	1	0	0	0	0	0	0	0	0	0	0	0	0	0	0	0		2			2
720	2019-02-28 14:46:30	akebede@clintonhealthaccess.org	2019-02-02	Abebe kebede		chai		4	401	4003	62433	2011-12-03	2011-12-03	9	no admission	1	4	2	2	6	9	37	57	A	1	0	0	0	0	0	0	0	0	0	0	0	0	0	0	0	0		2			2
721	2019-02-28 14:49:14	akebede@clintonhealthaccess.org	2019-02-02	Abebe kebede		chai		4	401	4003	60257	13/3/11	13/3/11	9	no admission	1	6	2	1	7.8	9	37.1	52	A B	1	1	0	0	0	0	0	0	0	0	0	0	0	0	0	0	0		2			2
722	2019-02-28 14:51:51	akebede@clintonhealthaccess.org	2019-02-02	Abebe kebede		chai		4	401	4003	57639	13/3/11	13/3/11	9	no admission	1	10	2	2	8	9	37	53	A	1	0	0	0	0	0	0	0	0	0	0	0	0	0	0	0	0		2			2
723	2019-02-28 14:54:27	akebede@clintonhealthaccess.org	2019-02-02	Abebe kebede		chai		4	401	4003	53112	13/3/11	13/3/11	9	no admission	2	20	3	2	13	9	37.3	43	A B	1	1	0	0	0	0	0	0	0	0	0	0	0	0	0	0	0		2			2
724	2019-02-28 14:57:43	akebede@clintonhealthaccess.org	2019-02-02	Abebe kebede		chai		4	401	4003	42892	14/3/11	14/3/11	9	no admission	5	48	3	1	14	9	37	40	A B	1	1	0	0	0	0	0	0	0	0	0	0	0	0	0	0	0		2			2
725	2019-02-28 15:01:15	akebede@clintonhealthaccess.org	2019-02-02	Abebe kebede		chai		4	401	4003	60416	14/3/11	14/3/11	9	no admission	1	5	2	1	7.8	9	37	50	A B	1	1	0	0	0	0	0	0	0	0	0	0	0	0	0	0	0		2			2
726	2019-02-28 15:04:29	akebede@clintonhealthaccess.org	2019-02-02	Abebe kebede		chai		4	401	4003	52099	14/3/11	14/3/11	9	no admission	3	32	3	2	12	9	38.4	47	A B G	1	1	0	0	0	0	1	0	0	0	0	0	0	0	0	0	0		2			2
727	2019-02-28 15:09:10	akebede@clintonhealthaccess.org	2019-02-02	Abebe kebede		chai		4	401	4003	53870	17/3/11	17/3/11	9	no admission	4	40	3	2	14	9	38.7	45	A B	1	1	0	0	0	0	0	0	0	0	0	0	0	0	0	0	0		2			2
728	2019-02-28 15:14:08	akebede@clintonhealthaccess.org	2019-02-02	Abebe kebede		chai		4	401	4003	54654	18/3/11	18/3/13	9	no admission	2	16	3	2	9	9	37	999	A B	1	1	0	0	0	0	0	0	0	0	0	0	0	0	0	0	0		2			2
729	2019-02-28 15:17:08	akebede@clintonhealthaccess.org	2019-02-02	Abebe kebede		chai		4	401	4003	48354	18/3/11	18/3/11	9	no admission	4	36	3	1	15	9	37	999	A B	1	1	0	0	0	0	0	0	0	0	0	0	0	0	0	0	0		2			2
730	2019-02-28 15:19:55	akebede@clintonhealthaccess.org	2019-02-02	Abebe kebede		chai		4	401	4003	59279	18/3/11	18/3/11	9	no admission	1	7	2	2	6	9	38	999	A B	1	1	0	0	0	0	0	0	0	0	0	0	0	0	0	0	0		2			2
731	2019-02-28 15:23:21	akebede@clintonhealthaccess.org	2019-02-02	Abebe kebede		Abebe kebede		4	401	4003	59703	18/3/11	18/3/11	9	no admission	1	6	2	1	7.5	9	37	50	A B	1	1	0	0	0	0	0	0	0	0	0	0	0	0	0	0	0		2			2
732	2019-02-28 15:26:45	akebede@clintonhealthaccess.org	2019-02-02	Abebe kebede		chai		4	401	4003	64143	19/3/11	19/3/11	9	no admission	1	10	2	1	99	9	37	56	A B	1	1	0	0	0	0	0	0	0	0	0	0	0	0	0	0	0		2			2
733	2019-02-28 15:29:33	akebede@clintonhealthaccess.org	2019-02-02	Abebe kebede		chai		4	401	4003	63975	19/3/11	19/3/11	9	no admission	1	11	2	2	9.5	9	37	52	A B	1	1	0	0	0	0	0	0	0	0	0	0	0	0	0	0	0		2			2
734	2019-02-28 15:35:21	akebede@clintonhealthaccess.org	2019-02-02	Abebe kebede		chai		4	401	4003	61621	20/3/11	20/3/11	9	no admission	1	5	2	2	7.8	9	37.1	53	A B	1	1	0	0	0	0	0	0	0	0	0	0	0	0	0	0	0		2			2
735	2019-02-28 15:40:14	akebede@clintonhealthaccess.org	2019-02-02	Abebe kebede		chai		4	401	4003	64630	20/3/11	20/3/11	9	no admission	3	31	3	1	10	9	37	40	A B	1	1	0	0	0	0	0	0	0	0	0	0	0	0	0	0	0		2			2
736	2019-02-28 15:43:54	akebede@clintonhealthaccess.org	2019-02-02	Abebe kebede		chai		4	401	4003	57643	20/3/11	20/3/11	9	no admission	2	12	3	2	9.5	9	37	40	A B	1	1	0	0	0	0	0	0	0	0	0	0	0	0	0	0	0		2			2
737	2019-02-28 15:47:19	akebede@clintonhealthaccess.org	2019-02-02	Abebe kebede		chai		4	401	4003	53744	20/3/11	20/3/11	9	no admission	2	19	3	1	10	9	39	41	A B G	1	1	0	0	0	0	1	0	0	0	0	0	0	0	0	0	0		2			2
738	2019-02-28 15:50:10	akebede@clintonhealthaccess.org	2019-02-02	Abebe kebede		chai		4	401	4003	60958	21/3/11	21/3//11	9	no admission	1	6	2	1	8	9	37	50	A	1	0	0	0	0	0	0	0	0	0	0	0	0	0	0	0	0		2			2
739	2019-02-28 15:52:58	akebede@clintonhealthaccess.org	2019-02-02	Abebe kebede		chai		4	401	4003	61575	21/3/11	21/3/11	9	no admission	1	4	2	1	7	9	37	52	A B	1	1	0	0	0	0	0	0	0	0	0	0	0	0	0	0	0		2			2
740	2019-02-28 15:56:24	akebede@clintonhealthaccess.org	2019-02-02	Abebe kebede		chai		4	401	4003	57012	21/3/11	21/3/11	9	no admission	2	12	3	1	10	9	37	42	B	0	1	0	0	0	0	0	0	0	0	0	0	0	0	0	0	0		2			2
741	2019-02-28 15:59:49	akebede@clintonhealthaccess.org	2019-02-02	Abebe kebede		chai		4	401	4003	58356	21/3/11	21/3/11	9	no admission	1	10	2	1	8	9	37	53	A B	1	1	0	0	0	0	0	0	0	0	0	0	0	0	0	0	0		2			2
742	2019-02-28 16:03:00	akebede@clintonhealthaccess.org	2019-02-02	Abebe kebede		chai		4	401	4003	52581	24/3/11	24/3/11	9	no admission	2	22	3	1	13	9	37	40	A B	1	1	0	0	0	0	0	0	0	0	0	0	0	0	0	0	0		2			2
743	2019-02-28 16:05:52	akebede@clintonhealthaccess.org	2019-02-02	Abebe kebede		chai		4	401	4003	60147	24/3/11	24/3/11	9	no admission	1	8	2	2	9	9	37	56	A	1	0	0	0	0	0	0	0	0	0	0	0	0	0	0	0	0		2			2
744	2019-02-28 16:08:58	akebede@clintonhealthaccess.org	2019-02-02	Abebe kebede		chai		4	401	4003	63601	24/3/11	24/3/11	9	no admission	1	2	2	1	4.5	9	37.1	51	A B	1	1	0	0	0	0	0	0	0	0	0	0	0	0	0	0	0		2			2
745	2019-02-28 16:12:46	akebede@clintonhealthaccess.org	2019-02-02	Abebe kebede		chai		4	401	4003	60100	24/3/11	24/3/11	9	no admission	1	8	2	1	7.4	9	37	53	A B	1	1	0	0	0	0	0	0	0	0	0	0	0	0	0	0	0		2			2
746	2019-02-28 16:22:50	akebede@clintonhealthaccess.org	2019-02-02	Abebe kebede		chai		4	401	4003	60995	24/3/11	24/3/11	9	no admission	1	6	2	1	7	9	37	52	A B	1	1	0	0	0	0	0	0	0	0	0	0	0	0	0	0	0		2			2
747	2019-02-28 16:25:59	akebede@clintonhealthaccess.org	2019-02-02	Abebe kebede		chai		4	401	4003	62052	24/3/11	24/3/11	9	no admission	1	6	2	1	5.5	9	38.5	50	A B G	1	1	0	0	0	0	1	0	0	0	0	0	0	0	0	0	0		2			2
748	2019-02-28 16:30:14	akebede@clintonhealthaccess.org	2019-02-02	Abebe kebede		chai		4	401	4003	64747	25/3/11	25/3/11	9	no admission	3	28	3	2	10	9	37	45	A B G	1	1	0	0	0	0	1	0	0	0	0	0	0	0	0	0	0		2			2
749	2019-02-28 16:33:28	akebede@clintonhealthaccess.org	2019-02-02	Abebe kebede		chai		4	401	4003	61619	25/3/11	25/3/11	9	no admission	1	5	2	1	5.5	9	37	51	A B G	1	1	0	0	0	0	1	0	0	0	0	0	0	0	0	0	0		2			2
750	2019-02-28 16:36:28	akebede@clintonhealthaccess.org	2019-02-02	Abebe kebede		chai		4	401	4003	53748	25/3/11	25/3/11	9	no admission	2	18	3	2	10	9	37.3	43	A B G	1	1	0	0	0	0	1	0	0	0	0	0	0	0	0	0	0		2			2
751	2019-02-28 16:42:01	akebede@clintonhealthaccess.org	2019-02-02	Abebe kebede		chai		4	401	4003	60291	25/3/11	25/3/11	9	no admission	1	7	2	1	99	9	37.2	56	A B G N	1	1	0	0	0	0	1	0	0	0	0	0	0	1	0	0	0		2			2
752	2019-02-28 16:45:29	akebede@clintonhealthaccess.org	2019-02-02	Abebe kebede		chai		4	401	4003	60649	25/3/11	25/3/11	9	no admission	1	8	2	2	9	9	37	999	A B G N	1	1	0	0	0	0	1	0	0	0	0	0	0	1	0	0	0		2			2
753	2019-02-28 16:48:16	akebede@clintonhealthaccess.org	2019-02-02	Abebe kebede		chai		4	401	4003	51539	25/3/11	25/3/11	9	no admission	2	14	3	1	9	9	38	999	A B G N	1	1	0	0	0	0	1	0	0	0	0	0	0	1	0	0	0		2			2
754	2019-02-28 16:51:19	akebede@clintonhealthaccess.org	2019-02-02	Abebe kebede		chai		4	401	4003	58884	26/3/11	26/3/11	9	no admission	1	8	2	1	7	9	37.2	999	A N	1	0	0	0	0	0	0	0	0	0	0	0	0	1	0	0	0		2			2
755	2019-02-28 16:54:55	akebede@clintonhealthaccess.org	2019-02-02	Abebe kebede		chai		4	401	4003	64781	26/3/11	26/3/11	9	no admission	1	8	2	2	99	9	37.1	56	A B G N	1	1	0	0	0	0	1	0	0	0	0	0	0	1	0	0	0		2			2
756	2019-02-28 16:58:53	akebede@clintonhealthaccess.org	2019-02-02	Abebe kebede		chai		4	401	4003	64787	27/3/11	27/3/11	9	no admission	2	14	3	1	9	9	37.2	42	A B G N	1	1	0	0	0	0	1	0	0	0	0	0	0	1	0	0	0		2			2
757	2019-02-28 17:04:27	akebede@clintonhealthaccess.org	2019-02-02	Abebe kebede		chai		4	401	4003	61887	27/3/11	2011-07-03	9	no admission	1	4	2	1	99	9	37.2	51	A B G N	1	1	0	0	0	0	1	0	0	0	0	0	0	1	0	0	0		2			2
758	2019-02-28 17:12:02	akebede@clintonhealthaccess.org	2019-02-02	Abebe kebede		chai		4	401	4003	62827	27/3/11	27/3/11	9	no admission	1	3	2	1	5	9	37	53	A B G N	1	1	0	0	0	0	1	0	0	0	0	0	0	1	0	0	0		2			2
759	2019-02-28 17:19:01	akebede@clintonhealthaccess.org	2019-02-02	Abebe kebede		chai		4	401	4003	61524	27/3/11	27/3/11	9	no admission	1	8	2	1	99	9	37	56	A B G N	1	1	0	0	0	0	1	0	0	0	0	0	0	1	0	0	0		2			2
760	2019-03-01 08:33:38	akebede@clintonhealthaccess.org	2019-02-02	Abebe kebede		chai		4	401	4003	59562	27/3/11	27/3/11	9	no admission	1	9	2	1	6	9	36	999	A B G N	1	1	0	0	0	0	1	0	0	0	0	0	0	1	0	0	0		2			2
761	2019-03-01 08:36:31	akebede@clintonhealthaccess.org	2019-02-02	Abebe kebede		chai		4	401	4003	60127	2011-01-04	2011-01-04	9	no admission	1	7	2	2	7.3	9	37.1	51	A B G N	1	1	0	0	0	0	1	0	0	0	0	0	0	1	0	0	0		2			2
762	2019-03-01 08:39:13	akebede@clintonhealthaccess.org	2019-02-02	Abebe kebede		chai		4	401	4003	62297	2011-01-04	2011-01-04	9	no admission	1	3	2	1	7	9	37.1	51	A B G N	1	1	0	0	0	0	1	0	0	0	0	0	0	1	0	0	0		2			2
763	2019-03-01 08:43:56	akebede@clintonhealthaccess.org	2019-02-02	Abebe kebede		chai		4	401	4003	61253	2011-01-04	2011-01-04	9	no admission	1	5	2	1	6	9	37.3	999	A B G N	1	1	0	0	0	0	1	0	0	0	0	0	0	1	0	0	0		2			2
764	2019-03-01 08:47:15	akebede@clintonhealthaccess.org	2019-02-02	Abebe kebede		chai		4	401	4003	64834	2011-01-04	2011-01-04	9	no admission	2	14	3	1	10	9	36	999	A G	1	0	0	0	0	0	1	0	0	0	0	0	0	0	0	0	0		2			2
765	2019-03-01 08:50:01	akebede@clintonhealthaccess.org	2019-02-02	Abebe kebede		chai		4	401	4003	59564	2011-01-04	2011-01-04	9	no admission	1	9	2	1	5	9	38	999	A G N	1	0	0	0	0	0	1	0	0	0	0	0	0	1	0	0	0		2			2
766	2019-03-01 08:52:46	akebede@clintonhealthaccess.org	2019-02-02	Abebe kebede		chai		4	401	4003	62399	2011-02-04	2011-02-04	9	no admission	4	39	3	1	14	9	36	999	A B G N	1	1	0	0	0	0	1	0	0	0	0	0	0	1	0	0	0		2			2
767	2019-03-01 08:55:59	akebede@clintonhealthaccess.org	2019-02-02	Abebe kebede		chai		4	401	4003	57403	2011-02-04	2011-02-04	9	no admission	1	11	2	1	9.8	9	37.8	52	A B G N	1	1	0	0	0	0	1	0	0	0	0	0	0	1	0	0	0		2			2
768	2019-03-01 08:59:35	akebede@clintonhealthaccess.org	2019-02-02	Abebe kebede		chai		4	401	4003	59736	2011-02-04	2011-02-04	9	no admission	1	8	2	1	99	9	9	53	A B N	1	1	0	0	0	0	0	0	0	0	0	0	0	1	0	0	0		2			2
769	2019-03-01 09:10:50	akebede@clintonhealthaccess.org	2019-02-02	Abebe kebede		chai		4	401	4003	42561	2011-03-04	2011-03-04	9	no admission	4	39	3	2	13	9	37	42	A B G N	1	1	0	0	0	0	1	0	0	0	0	0	0	1	0	0	0		2			2
770	2019-03-01 09:13:27	akebede@clintonhealthaccess.org	2019-02-02	Abebe kebede		chai		4	401	4003	48316	2011-03-04	2011-03-04	9	no admission	3	29	3	2	10	9	37.2	43	A B G N	1	1	0	0	0	0	1	0	0	0	0	0	0	1	0	0	0		2			2
771	2019-03-01 09:16:32	akebede@clintonhealthaccess.org	2019-02-02	Abebe kebede		chai		4	401	4003	61603	2011-03-04	2011-03-04	9	no admission	1	6	2	2	7.9	9	37	50	A B G N	1	1	0	0	0	0	1	0	0	0	0	0	0	1	0	0	0		2			2
772	2019-03-01 09:19:39	akebede@clintonhealthaccess.org	2019-02-02	Abebe kebede		chai		4	401	4003	61728	2011-03-04	2011-03-04	9	no admission	1	3	2	1	7.5	9	37	53	A B G N	1	1	0	0	0	0	1	0	0	0	0	0	0	1	0	0	0		2			2
773	2019-03-01 09:22:55	akebede@clintonhealthaccess.org	2019-02-02	Abebe kebede		chai		4	401	4003	56613	2011-04-04	2011-04-04	9	no admission	2	13	3	1	10	9	37.3	42	A B G N	1	1	0	0	0	0	1	0	0	0	0	0	0	1	0	0	0		2			2
774	2019-03-01 09:25:55	akebede@clintonhealthaccess.org	2019-02-02	Abebe kebede		chai		4	401	4003	55335	2011-04-04	2011-04-04	9	no admission	2	16	3	1	10	9	37	47	A B G N	1	1	0	0	0	0	1	0	0	0	0	0	0	1	0	0	0		2			2
775	2019-03-01 09:29:17	akebede@clintonhealthaccess.org	2019-02-02	Abebe kebede		chai		4	401	4003	59096	2011-04-04	2011-04-04	9	no admission	1	9	2	2	99	9	37	52	A B G N	1	1	0	0	0	0	1	0	0	0	0	0	0	1	0	0	0		2			2
776	2019-03-01 09:32:53	akebede@clintonhealthaccess.org	2019-02-02	Abebe kebede		chai		4	401	4003	59432	2011-04-04	2011-04-04	9	no admission	1	11	2	1	99	9	38	53	A B G N	1	1	0	0	0	0	1	0	0	0	0	0	0	1	0	0	0		2			2
777	2019-03-01 09:36:29	akebede@clintonhealthaccess.org	2019-02-02	Abebe kebede		chai		4	401	4003	60528	2011-05-04	2011-05-04	9	no admission	1	8	2	1	8.5	9	37	52	A B G N	1	1	0	0	0	0	1	0	0	0	0	0	0	1	0	0	0		2			2
778	2019-03-01 09:39:40	akebede@clintonhealthaccess.org	2019-02-02	Abebe kebede		chai		4	401	4003	58351	2011-05-04	2011-05-04	9	no admission	1	11	2	1	8	9	37	50	A G N	1	0	0	0	0	0	1	0	0	0	0	0	0	1	0	0	0		2			2
779	2019-03-01 09:44:07	akebede@clintonhealthaccess.org	2019-02-02	Abebe kebede		chai		4	401	4003	59890	2011-08-04	2011-08-04	9	no admission	1	9	2	1	7	9	37.2	999	A G N	1	0	0	0	0	0	1	0	0	0	0	0	0	1	0	0	0		2			2
780	2019-03-01 09:47:15	akebede@clintonhealthaccess.org	2019-02-02	Abebe kebede		chai		4	401	4003	62205	2011-08-04	2011-08-04	9	no admission	1	5	2	1	8	9	9	999	A N	1	0	0	0	0	0	0	0	0	0	0	0	0	1	0	0	0		2			2
781	2019-03-01 09:51:12	akebede@clintonhealthaccess.org	2019-02-02	Abebe kebede		chai		4	401	4003	62007	2011-08-04	2011-08-04	9	no admission	1	4	2	1	7	9	35	999	A G N	1	0	0	0	0	0	1	0	0	0	0	0	0	1	0	0	0		2			2
782	2019-03-01 09:53:49	akebede@clintonhealthaccess.org	2019-02-02	Abebe kebede		chai		4	401	4003	60380	2011-09-04	2011-09-04	9	no admission	1	6	2	2	7.5	9	37.5	56	A B G N	1	1	0	0	0	0	1	0	0	0	0	0	0	1	0	0	0		2			2
783	2019-03-01 09:56:47	akebede@clintonhealthaccess.org	2019-02-02	Abebe kebede		chai		4	401	4003	51599	2011-09-04	2011-09-04	9	no admission	3	24	3	1	10	9	37	42	A B G N	1	1	0	0	0	0	1	0	0	0	0	0	0	1	0	0	0		2			2
784	2019-03-01 10:00:00	akebede@clintonhealthaccess.org	2019-02-02	Abebe kebede		chai		4	401	4003	60977	2011-09-04	2011-09-04	9	no admission	1	7	2	1	99	9	37	56	A G N	1	0	0	0	0	0	1	0	0	0	0	0	0	1	0	0	0		2			2
785	2019-03-01 10:02:28	akebede@clintonhealthaccess.org	2019-02-02	Abebe kebede		chai		4	401	4003	55224	2011-09-04	2011-09-04	9	no admission	2	17	3	2	10	9	37	58	A B G N	1	1	0	0	0	0	1	0	0	0	0	0	0	1	0	0	0		2			2
786	2019-03-01 10:05:24	akebede@clintonhealthaccess.org	2019-02-02	Abebe kebede		chai		4	401	4003	61281	2011-09-04	2011-09-04	9	no admission	1	6	2	2	7	9	37	57	A B G N	1	1	0	0	0	0	1	0	0	0	0	0	0	1	0	0	0		2			2
787	2019-03-01 10:08:43	akebede@clintonhealthaccess.org	2019-02-02	Abebe kebede		chai		4	401	4003	53906	2011-10-04	2011-10-04	9	no admission	2	19	3	2	10	9	37.2	49	A B G N	1	1	0	0	0	0	1	0	0	0	0	0	0	1	0	0	0		2			2
788	2019-03-01 10:11:15	akebede@clintonhealthaccess.org	2019-02-02	Abebe kebede		chai		4	401	4003	60230	2011-10-04	2011-10-04	9	no admission	1	8	2	1	99	9	37.2	53	A B G N	1	1	0	0	0	0	1	0	0	0	0	0	0	1	0	0	0		2			2
789	2019-03-01 10:13:57	akebede@clintonhealthaccess.org	2019-02-02	Abebe kebede		chai		4	401	4003	56594	2011-12-04	2011-12-04	9	no admission	2	14	3	1	10	9	37	41	A B G N	1	1	0	0	0	0	1	0	0	0	0	0	0	1	0	0	0		2			2
790	2019-03-01 10:18:50	rgebeyehu@clintonhealthaccess.org	2019-02-12	Remrim Gebeyehu		CHAI		1	102	1002	72502	14/02/11	14/02/11	9	Managed as out patient	1	6	2	2	99	9	9	999	Y	0	0	0	0	0	0	0	0	0	0	0	0	0	0	0	0	1		2			2
791	2019-03-01 10:22:43	rgebeyehu@clintonhealthaccess.org	2019-02-12	Remrim Gebeyehu		CHAI		1	102	1002	76975	14/02/11	14/02/11	9	Managed as out patient	2	20	3	2	99	9	9	999	Y	0	0	0	0	0	0	0	0	0	0	0	0	0	0	0	0	1		2			2
792	2019-03-01 10:26:05	rgebeyehu@clintonhealthaccess.org	2019-02-12	Remrim Gebeyehu		CHAI		1	102	1002	5289	15/02/11	15/02/11	9	Managed as out patient	3	35	3	2	99	9	9	999	Y	0	0	0	0	0	0	0	0	0	0	0	0	0	0	0	0	1		2			2
793	2019-03-01 10:29:37	rgebeyehu@clintonhealthaccess.org	2019-02-12	Remrim Gebeyehu		CHAI		1	102	1002	81603	15/02/11	15/02/11	9	Managed as out patient	1	3	2	1	99	9	9	999	Y	0	0	0	0	0	0	0	0	0	0	0	0	0	0	0	0	1		2			2
794	2019-03-01 10:33:21	rgebeyehu@clintonhealthaccess.org	2019-02-12	Remrim Gebeyehu		CHAI		1	102	1002	59751	15/02/11	15/02/11	9	Managed as out patient	1	10	2	1	99	9	9	999	Y	0	0	0	0	0	0	0	0	0	0	0	0	0	0	0	0	1		2			2
795	2019-03-01 10:36:45	rgebeyehu@clintonhealthaccess.org	2019-02-12	Remrim Gebeyehu		CHAI		1	102	1002	76975	15/02/11	15/02/11	9	Managed as out Patient	4	36	3	1	99	9	9	999	Y	0	0	0	0	0	0	0	0	0	0	0	0	0	0	0	0	1		2			2
796	2019-03-01 10:40:11	rgebeyehu@clintonhealthaccess.org	2019-02-12	Remrim Gebeyehu		CHAI		1	102	1002	71227	16/02/11	16/02/11	9	Managed as out patient	2	12	3	1	99	9	9	999	Y	0	0	0	0	0	0	0	0	0	0	0	0	0	0	0	0	1		2			2
797	2019-03-01 10:43:27	rgebeyehu@clintonhealthaccess.org	2019-02-12	Remrim Gebeyhu		CHAI		1	102	1002	82241	16/02/11	16/02/11	9	Managed as out patient	1	11	2	1	99	9	9	999	Y	0	0	0	0	0	0	0	0	0	0	0	0	0	0	0	0	1		2			2
798	2019-03-01 10:57:00	rgebeyehu@clintonhealthaccess.org	2019-02-12	Remrim Gebeyehu		CHAI		1	102	1002	82125	16/02/11	16/02/11	9	Managed as out patient	1	9	2	1	99	9	9	999	Y	0	0	0	0	0	0	0	0	0	0	0	0	0	0	0	0	1		2			2
799	2019-03-01 11:00:26	rgebeyehu@clintonhealthaccess.org	2019-02-12	Remrim Gebeyehu		CHAI		1	102	1002	82128	16/02/11	16/02/11	9	Managed as out patient	1	3	2	2	99	9	9	999	Y	0	0	0	0	0	0	0	0	0	0	0	0	0	0	0	0	1		2			2
800	2019-03-01 11:03:34	rgebeyehu@clintonhealthaccess.org	2019-02-12	Remrim Gebeyehu		CHAI		1	102	1002	16/02/11	16/02/11	16/02/11	9	Managed as out patient	1	4	2	2	99	9	9	999	Y	0	0	0	0	0	0	0	0	0	0	0	0	0	0	0	0	1		2			2
801	2019-03-01 11:07:08	rgebeyehu@clintonhealthaccess.org	2019-02-12	Remrim Gebeyehu		CHAI		1	102	1002	72468	16/02/11	16/02/11	9	Managed as out patient	1	5	2	1	99	9	9	999	Y	0	0	0	0	0	0	0	0	0	0	0	0	0	0	0	0	1		2			2
802	2019-03-01 11:10:34	rgebeyehu@clintonhealthaccess.org	2019-02-12	Remrim Gebeyehu		CHAI		1	102	1002	80113	16/02/11	16/02/11	9	Managed as out patient	1	3	2	1	99	9	9	999	Y	0	0	0	0	0	0	0	0	0	0	0	0	0	0	0	0	1		2			2
803	2019-03-01 11:14:14	rgebeyehu@clintonhealthaccess.org	2019-02-12	Remrim Gebeyehu		CHAI		1	102	1002	82332	19/02/11	19/02/11	9	Managed as out patient	1	10	2	2	99	9	9	999	Y	0	0	0	0	0	0	0	0	0	0	0	0	0	0	0	0	1		2			2
804	2019-03-01 11:17:30	rgebeyehu@clintonhealthaccess.org	2019-02-12	Remrim Gebeyehu		CHAI		1	102	1002	81565	19/02/11	19/02/11	9	Managed as out patient	1	6	2	2	99	9	9	999	Y	0	0	0	0	0	0	0	0	0	0	0	0	0	0	0	0	1		2			2
805	2019-03-01 11:20:23	rgebeyehu@clintonhealthaccess.org	2019-02-12	Remrim Gebeyehu		CHAI		1	102	1002	68410	19/02/11	19/02/11	9	Managed as out patient	1	4	2	2	99	9	9	999	Y	0	0	0	0	0	0	0	0	0	0	0	0	0	0	0	0	1		2			2
806	2019-03-01 11:23:29	rgebeyehu@clintonhealthaccess.org	2019-02-12	Remrim		CHAI		1	102	1002	80322	20/02/11	20/02/11	9	Managed as out patient	1	5	2	1	99	9	9	999	Y	0	0	0	0	0	0	0	0	0	0	0	0	0	0	0	0	1		2			2
807	2019-03-01 11:26:48	rgebeyehu@clintonhealthaccess.org	2019-02-12	Remrim		CHAI		1	102	1002	82561	20/02/11	20/02/11	9	Managed as out patient	1	9	2	2	99	9	9	99	Y	0	0	0	0	0	0	0	0	0	0	0	0	0	0	0	0	1		2			2
808	2019-03-01 11:29:47	rgebeyehu@clintonhealthaccess.org	2019-02-12	Remrim		CHAI		1	102	1002	67946	20/02/11	20/02/11	9	Managed as out patient	2	12	3	1	12	9	9	999	Y	0	0	0	0	0	0	0	0	0	0	0	0	0	0	0	0	1		2			2
809	2019-03-01 11:32:57	rgebeyehu@clintonhealthaccess.org	2019-02-12	Remrim		CHAI		1	102	1002	69433	20/02/11	20/02/11	9	Managed as out Patient	5	48	3	1	99	9	9	999	Y	0	0	0	0	0	0	0	0	0	0	0	0	0	0	0	0	1		2			2
810	2019-03-01 11:36:42	rgebeyehu@clintonhealthaccess.org	2019-02-12	Remrim		CHAI		1	102	1002	82357	20/02/11	20/02/11	9	Managed as out patient	4	36	3	2	99	9	9	999	Y	0	0	0	0	0	0	0	0	0	0	0	0	0	0	0	0	1		2			2
811	2019-03-01 11:39:45	rgebeyehu@clintonhealthaccess.org	2019-02-12	Remrim		CHAI		1	102	1002	59619	20/02/11	20/02/11	9	Managed as out patient	2	12	3	2	99	9	9	999	Y	0	0	0	0	0	0	0	0	0	0	0	0	0	0	0	0	1		2			2
812	2019-03-01 11:43:27	rgebeyehu@clintonhealthaccess.org	2019-02-12	Remrim		CHAI		1	102	1002	12193	20/02/11	20/02/11	9	Managed as out patient	4	39	3	1	99	9	9	999	Y	0	0	0	0	0	0	0	0	0	0	0	0	0	0	0	0	1		2			2
813	2019-03-01 11:46:38	rgebeyehu@clintonhealthaccess.org	2019-02-12	Remrim		CHAI		1	102	1002	82417	20/02/11	20/02/11	9	Managed as out patient	1	7	2	1	99	9	9	999	Y	0	0	0	0	0	0	0	0	0	0	0	0	0	0	0	0	1		2			2
814	2019-03-01 11:49:26	rgebeyehu@clintonhealthaccess.org	2019-02-12	Remrim		CHAI		1	102	1002	73244	21/02/11	21/02/11	9	Managed as out patient	1	6	2	2	99	9	9	999	Y	0	0	0	0	0	0	0	0	0	0	0	0	0	0	0	0	1		2			2
815	2019-03-01 11:52:54	rgebeyehu@clintonhealthaccess.org	2019-02-12	Remrim		CHAI		1	102	1002	82573	21/02/11	21/02/11	9	Managed as out patient	1	8	2	1	99	9	9	999	Y	0	0	0	0	0	0	0	0	0	0	0	0	0	0	0	0	1		2			2
816	2019-03-01 11:55:58	rgebeyehu@clintonhealthaccess.org	2019-02-12	Remrim		CHAI		1	102	1002	71325	21/02/11	21/02/11	9	Managed as out patient	2	12	3	1	99	9	9	999	Y	0	0	0	0	0	0	0	0	0	0	0	0	0	0	0	0	1		2			2
817	2019-03-01 11:59:09	rgebeyehu@clintonhealthaccess.org	2019-02-12	Remrim		CHAI		1	102	1002	82665	23/02/11	23/02/11	9	Managed as out patient	1	3	2	1	99	9	9	999	Y	0	0	0	0	0	0	0	0	0	0	0	0	0	0	0	0	1		2			2
818	2019-03-01 12:02:09	rgebeyehu@clintonhealthaccess.org	2019-02-12	Remrim		CHAI		1	102	1002	82815	26/02/11	26/02/11	9	Managed as out patient	1	8	2	1	99	9	9	999	Y	0	0	0	0	0	0	0	0	0	0	0	0	0	0	0	0	1		2			2
819	2019-03-01 12:05:55	rgebeyehu@clintonhealthaccess.org	2019-02-12	Remrim		CHAI		1	102	1002	45273	26/02/11	26/02/11	9	Managed as out patient	5	48	3	2	99	9	9	999	Y	0	0	0	0	0	0	0	0	0	0	0	0	0	0	0	0	1		2			2
820	2019-03-01 12:10:55	rgebeyehu@clintonhealthaccess.org	2019-02-12	Remrim		CHAI		1	102	1002	75447	26/02/11	26/02/11	9	Managed as out patient	1	4	2	2	99	9	9	999	Y	0	0	0	0	0	0	0	0	0	0	0	0	0	0	0	0	1		2			2
821	2019-03-01 12:14:15	rgebeyehu@clintonhealthaccess.org	2019-02-12	Remrim		CHAI		1	102	1002	9125	27/02/11	27/02/11	9	Managed as out patient	4	36	3	1	99	9	9	999	Y	0	0	0	0	0	0	0	0	0	0	0	0	0	0	0	0	1		2			2
822	2019-03-01 12:17:11	rgebeyehu@clintonhealthaccess.org	2019-02-12	Remrim		CHAI		1	102	1002	58314	27/02/11	27/02/11	9	Managed as out patient	1	9	2	1	99	9	9	999	Y	0	0	0	0	0	0	0	0	0	0	0	0	0	0	0	0	1		2			2
823	2019-03-01 14:14:20	rgebeyehu@clintonhealthaccess.org	2019-02-12	Remrim Gebeyehu		CHAI		1	102	1002	28/02/11	28/02/11	28/02/11	9	Managed as out patient	2	12	3	1	99	9	9	999	Y	0	0	0	0	0	0	0	0	0	0	0	0	0	0	0	0	1		2			2
824	2019-03-01 14:30:06	rgebeyehu@clintonhealthaccess.org	2019-02-12	Remrim		CHAI		1	102	1002	77125	28/02/11	28/02/11	9	Managed as out patient	1	3	2	1	99	9	9	999	Y	0	0	0	0	0	0	0	0	0	0	0	0	0	0	0	0	1		2			2
825	2019-03-01 14:33:05	rgebeyehu@clintonhealthaccess.org	2019-02-12	Remrim		CHAI		1	102	1002	74669	28/02/11	28/02/11	9	Managed as out patient	1	5	2	1	99	9	9	999	Y	0	0	0	0	0	0	0	0	0	0	0	0	0	0	0	0	1		2			2
826	2019-03-01 14:36:42	rgebeyehu@clintonhealthaccess.org	2019-02-12	Remrim		CHAI		1	102	1002	57444	29/02/11	29/02/11	9	Managed as out patient	2	12	3	2	99	9	9	999	Y	0	0	0	0	0	0	0	0	0	0	0	0	0	0	0	0	1		2			2
827	2019-03-01 14:39:30	akebede@clintonhealthaccess.org	2019-02-02	Abebe kebede		chai		4	401	4003	58791	2011-12-04	2011-12-04	9	no admission	1	11	2	2	8.5	9	37.3	56	A B G N	1	1	0	0	0	0	1	0	0	0	0	0	0	1	0	0	0		2			2
828	2019-03-01 14:39:57	rgebeyehu@clintonhealthaccess.org	2019-02-12	Remrim		CHAI		1	102	1002	68020	29/02/11	29/02/11	9	Managed as out patient	5	48	3	2	99	9	9	999	Y	0	0	0	0	0	0	0	0	0	0	0	0	0	0	0	0	1		2			2
829	2019-03-01 14:42:59	rgebeyehu@clintonhealthaccess.org	2019-02-12	Remrim		CHAI		1	102	1002	5162	29/02/11	29/02/11	9	Managed as out patient	3	24	3	1	99	9	9	999	Y	0	0	0	0	0	0	0	0	0	0	0	0	0	0	0	0	1		2			2
830	2019-03-01 14:44:13	akebede@clintonhealthaccess.org	2019-02-02	Abebe kebede		chai		4	401	4003	63413	2011-12-04	2011-12-04	9	no admission	1	2	2	1	6	9	37	56	A B G N	1	1	0	0	0	0	1	0	0	0	0	0	0	1	0	0	0		2			2
831	2019-03-01 14:45:55	rgebeyehu@clintonhealthaccess.org	2019-02-12	Remrim		CHAI		1	102	1002	56456	28/02/11	29/02/11	9	Managed as out patient	1	9	2	1	99	9	9	999	Y	0	0	0	0	0	0	0	0	0	0	0	0	0	0	0	0	1		2			2
832	2019-03-01 14:47:19	akebede@clintonhealthaccess.org	2019-02-02	Abebe kebede		chai		4	401	4003	59080	2011-12-04	2011-12-04	9	no admission	1	9	2	1	99	9	37.3	52	A B G N	1	1	0	0	0	0	1	0	0	0	0	0	0	1	0	0	0		2			2
833	2019-03-01 14:48:47	rgebeyehu@clintonhealthaccess.org	2019-02-12	Remrim		CHAI		1	102	1002	49741	29/02/11	29/02/11	9	Managed as out patient	2	15	3	1	99	9	9	999	Y	0	0	0	0	0	0	0	0	0	0	0	0	0	0	0	0	1		2			2
834	2019-03-01 14:50:23	akebede@clintonhealthaccess.org	2019-02-02	Abebe kebede		chai		4	401	4003	56184	2011-12-04	2011-12-04	9	no admission	2	14	3	1	10	9	37.2	40	A B G N	1	1	0	0	0	0	1	0	0	0	0	0	0	1	0	0	0		2			2
835	2019-03-01 14:52:10	rgebeyehu@clintonhealthaccess.org	2019-02-12	Remrim		CHAI		1	102	1002	85969	18/04/11	18/04/11	9	Managed as out patient	1	5	2	1	99	9	9	999	Y	0	0	0	0	0	0	0	0	0	0	0	0	0	0	0	0	1		2			2
836	2019-03-01 14:54:14	akebede@clintonhealthaccess.org	2019-02-02	Abebe kebede		chai		4	401	4003	64466	15/4/11	15/4/11	9	no admission	1	10	2	1	8	74	36.5	54	A B G N	1	1	0	0	0	0	1	0	0	0	0	0	0	1	0	0	0		2			2
837	2019-03-01 14:55:13	rgebeyehu@clintonhealthaccess.org	2019-02-12	Remrim		CHAI		1	102	1002	66493	19/04/11	19/04/11	9	managed as out patient	2	15	3	1	99	9	9	999	Y	0	0	0	0	0	0	0	0	0	0	0	0	0	0	0	0	1		2			2
838	2019-03-01 14:58:32	rgebeyehu@clintonhealthaccess.org	2019-02-12	Remrim		CHAI		1	102	1002	67646	19/04/11	19/04/11	9	Managed as out patient	1	8	2	2	99	9	9	999	Y	0	0	0	0	0	0	0	0	0	0	0	0	0	0	0	0	1		2			2
839	2019-03-01 15:01:25	rgebeyehu@clintonhealthaccess.org	2019-02-12	Remrim		CHAI		1	102	1002	64385	30/02/11	30/02/11	9	Managed as out patient	1	9	2	2	99	9	9	999	Y	0	0	0	0	0	0	0	0	0	0	0	0	0	0	0	0	1		2			2
840	2019-03-01 15:03:23	akebede@clintonhealthaccess.org	2019-02-02	Abebe kebede		chai		4	401	4003	58399	15/4/11	2011-05-04	9	no admission	3	24	3	1	11	9	36.5	999	A B G K N	1	1	0	0	0	0	1	0	0	0	1	0	0	1	0	0	0		2			2
841	2019-03-01 15:05:57	akebede@clintonhealthaccess.org	2019-02-02	Abebe kebede		chai		4	401	4003	61050	15/4/11	15/4/11	9	no admission	2	15	3	2	10	9	39	999	A G N	1	0	0	0	0	0	1	0	0	0	0	0	0	1	0	0	0		2			2
842	2019-03-01 15:07:20	rgebeyehu@clintonhealthaccess.org	2019-02-12	Remrim		CHAI		1	102	1002	10503	2011-03-03	2011-03-03	9	Managed as out patient	3	24	3	2	99	9	9	999	Y	0	0	0	0	0	0	0	0	0	0	0	0	0	0	0	0	1		2			2
843	2019-03-01 15:08:31	akebede@clintonhealthaccess.org	2019-02-02	Abebe kebede		chai		4	401	4003	56922	16/4/11	16/4/11	9	no admission	2	14	3	1	10	9	36.9	49	A B G N	1	1	0	0	0	0	1	0	0	0	0	0	0	1	0	0	0		2			2
844	2019-03-01 15:10:58	rgebeyehu@clintonhealthaccess.org	2019-02-12	Remrim		CHAI		1	102	1002	71792	2011-03-03	2011-03-03	9	Managed as out patient	2	18	3	1	99	9	9	999	Y	0	0	0	0	0	0	0	0	0	0	0	0	0	0	0	0	1		2			2
845	2019-03-01 15:12:49	akebede@clintonhealthaccess.org	2019-02-02	Abebe kebede		chai		4	401	4003	59138	16/4/11	16/4/11	9	no admission	1	8	2	1	99	9	37	999	A G N	1	0	0	0	0	0	1	0	0	0	0	0	0	1	0	0	0		2			2
846	2019-03-01 15:15:36	akebede@clintonhealthaccess.org	2019-02-02	Abebe kebede		chai		4	401	4003	59854	16/4/11	16/4/11	9	no admission	1	8	2	2	6	9	36	999	A G N	1	0	0	0	0	0	1	0	0	0	0	0	0	1	0	0	0		2			2
847	2019-03-01 15:18:36	akebede@clintonhealthaccess.org	2019-02-02	Abebe kebede		chai		4	401	4003	65148	17/4/11	17/4/11	9	no admission	2	12	3	1	10	9	39.2	999	A G N	1	0	0	0	0	0	1	0	0	0	0	0	0	1	0	0	0		2			2
848	2019-03-01 15:21:11	akebede@clintonhealthaccess.org	2019-02-02	Abebe kebede		chai		4	401	4003	43415	17/4/11	17/4/11	9	no admission	2	14	3	1	8.3	9	36	999	A G N	1	0	0	0	0	0	1	0	0	0	0	0	0	1	0	0	0		2			2
849	2019-03-01 15:23:44	akebede@clintonhealthaccess.org	2019-02-02	Abebe kebede		chai		4	401	4003	32347	17/4/11	17/4/11	9	no admission	4	46	3	1	15	9	38.7	999	A G N	1	0	0	0	0	0	1	0	0	0	0	0	0	1	0	0	0		2			2
850	2019-03-01 15:26:34	akebede@clintonhealthaccess.org	2019-02-02	Abebe kebede		chai		4	401	4003	39088	19/4/11	194/11	9	no admission	2	15	3	1	9	70	35	999	A G N	1	0	0	0	0	0	1	0	0	0	0	0	0	1	0	0	0		2			2
851	2019-03-01 15:30:21	akebede@clintonhealthaccess.org	2019-02-02	Abebe kebede		chai		4	401	4003	53575	22/4/11	22/4/11	9	no admission	2	22	3	1	12	9	38	999	A E N	1	0	0	0	1	0	0	0	0	0	0	0	0	1	0	0	0		2			2
852	2019-03-01 15:33:56	akebede@clintonhealthaccess.org	2019-02-02	Abebe kebede		chai		4	401	4003	38601	22/4/11	22/4/11	9	no admission	5	54	3	2	14	74	36	999	A G N	1	0	0	0	0	0	1	0	0	0	0	0	0	1	0	0	0		2			2
853	2019-03-01 15:38:50	akebede@clintonhealthaccess.org	2019-02-02	Abebe kebede		chai		4	401	4003	43258	22/4/11	22/4/11	9	no admission	5	53	3	2	12	9	37.5	50	A B G K N	1	1	0	0	0	0	1	0	0	0	1	0	0	1	0	0	0		2			2
854	2019-03-01 15:41:45	akebede@clintonhealthaccess.org	2019-02-02	Abebe kebede		chai		4	401	4003	44824	27/4/11	27/4/11	9	no admission	4	36	3	2	12	9	36.5	50	A B G N	1	1	0	0	0	0	1	0	0	0	0	0	0	1	0	0	0		2			2
855	2019-03-01 15:44:14	akebede@clintonhealthaccess.org	2019-02-02	Abebe kebede		chai		4	401	4003	65082	23/4/11	23/4/11	9	no admission	1	3	2	1	4	9	37.2	999	A G N	1	0	0	0	0	0	1	0	0	0	0	0	0	1	0	0	0		2			2
856	2019-03-01 15:46:26	akebede@clintonhealthaccess.org	2019-02-02	Abebe kebede		chai		4	401	4003	64216	24/4/11	24/4/11	9	no admission	1	3	2	1	5		36.9	60	A B G N	1	1	0	0	0	0	1	0	0	0	0	0	0	1	0	0	0		2			2
857	2019-03-01 15:48:50	akebede@clintonhealthaccess.org	2019-02-02	Abebe kebede		chai		4	401	4003	54386	26/4/11	26/4/11	9	no admission	2	20	3	1	10	9	36.5	50	A B G N	1	1	0	0	0	0	1	0	0	0	0	0	0	1	0	0	0		2			2
858	2019-03-01 15:51:31	akebede@clintonhealthaccess.org	2019-02-02	Abebe kebede		chai		4	401	4003	46005	26/4/11	26/4/11	9	no admission	4	36	3	1	15	9	36.5	50	A B G N	1	1	0	0	0	0	1	0	0	0	0	0	0	1	0	0	0		2			2
859	2019-03-01 15:54:23	akebede@clintonhealthaccess.org	2019-02-02	Abebe kebede		chai		4	401	4003	54408	26/4/11	26/4/11	9	no admission	2	18	3	1	11	9	38	50	A B G N	1	1	0	0	0	0	1	0	0	0	0	0	0	1	0	0	0		2			2
860	2019-03-01 15:57:30	akebede@clintonhealthaccess.org	2019-02-02	Abebe kebede		chai		4	401	4003	61603	26/4/11	26/4/11	9	no admission	2	18	3	1	8	9	36.5	60	A B G N	1	1	0	0	0	0	1	0	0	0	0	0	0	1	0	0	0		2			2
861	2019-03-01 16:00:15	akebede@clintonhealthaccess.org	2019-02-02	abebe kebede		chai		4	401	4003	52719	26/4/11	26/4/11	9	no admission	3	30	3	2	12	9	36.5	62	A B G N	1	1	0	0	0	0	1	0	0	0	0	0	0	1	0	0	0		2			2
862	2019-03-01 16:03:02	akebede@clintonhealthaccess.org	2019-02-02	abebe kebede		chai		4	401	4003	62448	26/4/11	26/4/11	9	no admission	2	15	3	1	7	9	36.5	59	A B G N	1	1	0	0	0	0	1	0	0	0	0	0	0	1	0	0	0		2			2
863	2019-03-01 16:05:42	akebede@clintonhealthaccess.org	2019-02-02	Abebe kebede		chai		4	401	4003	63870	30/4/11	30/4/11	9	no admission	4	39	3	1	14	9	38	999	A G N	1	0	0	0	0	0	1	0	0	0	0	0	0	1	0	0	0		2			2
864	2019-03-01 16:08:07	akebede@clintonhealthaccess.org	2019-02-02	Abebe kebede		chai		4	401	4003	44293	30/4/11	30/4/11	9	no admission	3	35	3	1	12	9	37.2	999	A G N	1	0	0	0	0	0	1	0	0	0	0	0	0	1	0	0	0		2			2
865	2019-03-01 16:38:20	rgebeyehu@clintonhealthaccess.org	2019-02-12	Remrim		CHAI		1	102	1002	83269	2011-03-03	2011-03-03	9	Managed as out patient	3	24	3	1	99	9	9	999	Y	0	0	0	0	0	0	0	0	0	0	0	0	0	0	0	0	1		2			2
866	2019-03-01 16:41:23	rgebeyehu@clintonhealthaccess.org	2019-02-12	Remrim		CHAI		1	102	1002	56602	2011-03-03	2011-03-03	9	Managed as out patient	4	36	3	2	99	9	9	9	Y	0	0	0	0	0	0	0	0	0	0	0	0	0	0	0	0	1		2			2
867	2019-03-01 16:46:14	rgebeyehu@clintonhealthaccess.org	2019-02-12	Remrim		CHAI		1	102	1002	36577	2011-03-03	2011-03-03	9	managed as out patient	2	18	3	2	99	9	9	999	Y	0	0	0	0	0	0	0	0	0	0	0	0	0	0	0	0	1		2			2
868	2019-03-01 16:49:40	rgebeyehu@clintonhealthaccess.org	2019-02-12	Remrim		CHAI		1	102	1002	83141	2011-03-03	2011-03-03	9	Managed as out patient	1	3	2	1	99	9	9	999	Y	0	0	0	0	0	0	0	0	0	0	0	0	0	0	0	0	1		2			2
869	2019-03-01 16:53:29	rgebeyehu@clintonhealthaccess.org	2019-02-12	Remrim		CHAI		1	102	1002	83312	2011-03-03	2011-03-03	9	Managed as out patient	5	48	3	1	99	9	9	999	Y	0	0	0	0	0	0	0	0	0	0	0	0	0	0	0	0	1		2			2
870	2019-03-01 16:56:33	rgebeyehu@clintonhealthaccess.org	2019-02-12	Remrim		CHAI		1	102	1002	41117	2011-04-03	2011-04-03	9	Managed as out patient	1	10	2	2	99	9	9	999	Y	0	0	0	0	0	0	0	0	0	0	0	0	0	0	0	0	1		2			2
871	2019-03-01 16:59:35	rgebeyehu@clintonhealthaccess.org	2019-02-12	Remrim		CHAI		1	102	1002	83344	2011-04-03	2011-04-03	9	Managed as out patient	1	3	2	2	99	9	9	999	Y	0	0	0	0	0	0	0	0	0	0	0	0	0	0	0	0	1		2			2
872	2019-03-01 17:03:30	rgebeyehu@clintonhealthaccess.org	2019-02-12	Remrim		CHAI		1	102	1002	51804	2011-06-03	2011-06-03	9	Managed as out patient	2	14	3	1	99	9	9	999	Y	0	0	0	0	0	0	0	0	0	0	0	0	0	0	0	0	1		2			2
873	2019-03-01 17:06:53	rgebeyehu@clintonhealthaccess.org	2019-02-12	Remrim		CHAI		1	102	1002	83578	2011-07-03	2011-07-03	9	Managed as out patient	1	4	2	2	99	9	9	999	Y	0	0	0	0	0	0	0	0	0	0	0	0	0	0	0	0	1		2			2
874	2019-03-01 17:32:43	rgebeyehu@clintonhealthaccess.org	2019-02-12	Remrim		CHAI		1	102	1002	69802	2011-07-03	2011-07-03	9	Managed as out patient	1	4	2	2	99	9	9	999	Y	0	0	0	0	0	0	0	0	0	0	0	0	0	0	0	0	1		2			2
875	2019-03-02 10:32:34	rgebeyehu@clintonhealthaccess.org	2019-02-12	Remrim		CHAI		1	102	1002	67135	2011-07-03	2011-07-03	9	Managed as out patient	1	10	2	1	99	9	9	999	Y	0	0	0	0	0	0	0	0	0	0	0	0	0	0	0	0	1		2			2
876	2019-03-02 10:35:27	rgebeyehu@clintonhealthaccess.org	2019-02-12	Remrim		CHAI		1	102	1002	54354	2011-07-03	2011-07-03	9	Managed as out patient	2	13	3	2	99	9	9	999	Y	0	0	0	0	0	0	0	0	0	0	0	0	0	0	0	0	1		2			2
877	2019-03-02 10:38:09	rgebeyehu@clintonhealthaccess.org	2019-02-12	Remrim		CHAI		1	102	1002	10563	2011-10-03	2011-10-03	9	Managed as out patient	3	24	3	1	99	9	9	999	Y	0	0	0	0	0	0	0	0	0	0	0	0	0	0	0	0	1		2			2
878	2019-03-02 10:41:00	rgebeyehu@clintonhealthaccess.org	2019-02-12	Remrim		CHAI		1	102	1002	30324	2011-10-03	2011-10-03	9	Managed as out patient	1	10	2	2	99	9	9	999	Y	0	0	0	0	0	0	0	0	0	0	0	0	0	0	0	0	1		2			2
879	2019-03-02 10:44:40	rgebeyehu@clintonhealthaccess.org	2019-02-12	Remrim		CHAI		1	102	1002	69169	2011-10-03	2011-10-03	9	Managed as out patient	1	8	2	1	99	9	9	999	Y	0	0	0	0	0	0	0	0	0	0	0	0	0	0	0	0	1		2			2
880	2019-03-02 10:47:24	rgebeyehu@clintonhealthaccess.org	2019-02-12	Remrim		CHAI		1	102	1002	73546	2011-10-03	2011-10-03	9	Managed as out patient	1	5	2	1	99	9	9	999	Y	0	0	0	0	0	0	0	0	0	0	0	0	0	0	0	0	1		2			2
881	2019-03-02 10:50:09	rgebeyehu@clintonhealthaccess.org	2019-02-12	Remrim		CHAI		1	102	1002	16082	2011-10-03	2011-10-03	9	Managed as out patient	3	24	3	1	99	9	9	999	Y	0	0	0	0	0	0	0	0	0	0	0	0	0	0	0	0	1		2			2
882	2019-03-02 10:53:01	rgebeyehu@clintonhealthaccess.org	2019-02-12	Remrim		CHAI		1	102	1002	55299	2011-10-03	2011-10-03	9	Managed as out patient	1	11	2	2	99	9	9	999	Y	0	0	0	0	0	0	0	0	0	0	0	0	0	0	0	0	1		2			2
883	2019-03-02 10:59:12	rgebeyehu@clintonhealthaccess.org	2019-02-12	Remrim		CHAI		1	102	1002	53525	2011-12-03	2011-12-03	9	Managed as out patient	1	8	2	2	99	9	9	999	Y	0	0	0	0	0	0	0	0	0	0	0	0	0	0	0	0	1		2			2
884	2019-03-02 11:02:34	rgebeyehu@clintonhealthaccess.org	2019-02-12	Remrim		CHAI		1	102	1002	52508	2011-12-03	2011-12-03	9	Managed as out patient	2	13	3	1	99	9	9	999	Y	0	0	0	0	0	0	0	0	0	0	0	0	0	0	0	0	1		2			2
885	2019-03-02 11:05:18	rgebeyehu@clintonhealthaccess.org	2019-02-12	Remrim		CHAI		1	102	1002	67084	13/03/11	13/03/11	9	Managed as out patient	2	16	3	1	99	9	9	999	Y	0	0	0	0	0	0	0	0	0	0	0	0	0	0	0	0	1		2			2
886	2019-03-02 11:08:23	rgebeyehu@clintonhealthaccess.org	2019-02-12	Remrim		CHAI		1	102	1002	42206	17/03/11	17/03/11	9	Managed as out patient	2	16	3	1	99	9	9	999	Y	0	0	0	0	0	0	0	0	0	0	0	0	0	0	0	0	1		2			2
887	2019-03-02 11:12:01	rgebeyehu@clintonhealthaccess.org	2019-02-12	Remrim		CHAI		1	102	1002	84253	17/03/11	17/03/11	9	Managed as out patient	1	10	2	1	99	9	9	999	Y	0	0	0	0	0	0	0	0	0	0	0	0	0	0	0	0	1		2			2
888	2019-03-02 11:14:43	rgebeyehu@clintonhealthaccess.org	2019-02-12	Remrim		CHAI		1	102	1002	77899	17/03/11	17/03/11	9	managed as out patient	3	24	3	2	99	9	9	999	Y	0	0	0	0	0	0	0	0	0	0	0	0	0	0	0	0	1		2			2
889	2019-03-02 11:22:01	rgebeyehu@clintonhealthaccess.org	2019-02-12	Remrim		CHAI		1	102	1002	48160	18/03/11	18/03/11	9	Managed as out patient	2	12	3	1	99	9	9	999	Y	0	0	0	0	0	0	0	0	0	0	0	0	0	0	0	0	1		2			2
890	2019-03-02 11:24:50	rgebeyehu@clintonhealthaccess.org	2019-02-12	Remrim		CHAI		1	102	1002	59142	19/03/11	19/03/11	9	Managed as out patient	3	24	3	1	99	9	9	999	Y	0	0	0	0	0	0	0	0	0	0	0	0	0	0	0	0	1		2			2
891	2019-03-02 11:27:58	rgebeyehu@clintonhealthaccess.org	2019-02-12	Remrim		CHAI		1	102	1002	78291	19/03/11	19/03/11	9	Managed as out patient	1	6	2	1	99	9	9	999	Y	0	0	0	0	0	0	0	0	0	0	0	0	0	0	0	0	1		2			2
892	2019-03-02 11:30:48	rgebeyehu@clintonhealthaccess.org	2019-02-12	Remrim		CHAI		1	102	1002	84441	20/03/11	20/03/11	9	Managed as out patient	2	16	3	1	99	9	9	999	Y	0	0	0	0	0	0	0	0	0	0	0	0	0	0	0	0	1		2			2
893	2019-03-02 11:33:48	rgebeyehu@clintonhealthaccess.org	2019-02-12	Remrim		CHAI		1	102	1002	84448	20/03/11	20/03/11	9	Managed as out patient	4	36	3	1	99	9	9	999	Y	0	0	0	0	0	0	0	0	0	0	0	0	0	0	0	0	1		2			2
894	2019-03-02 11:41:19	rgebeyehu@clintonhealthaccess.org	2019-02-12	Remrim		CHAI		1	102	1002	10779	20/03/11	20/03/11	9	Managed as out patient	4	36	3	1	99	9	9	999	Y	0	0	0	0	0	0	0	0	0	0	0	0	0	0	0	0	1		2			2
895	2019-03-02 11:47:17	rgebeyehu@clintonhealthaccess.org	2019-02-12	Remrim		CHAI		1	102	1002	84505	21/03/11	21/03/11	9	Managed as out patient	1	6	2	1	99	9	9	999	Y	0	0	0	0	0	0	0	0	0	0	0	0	0	0	0	0	1		2			2
896	2019-03-02 11:50:08	rgebeyehu@clintonhealthaccess.org	2019-02-12	Remrim		CHAI		1	102	1002	24135	21/03/11	21/03/11	9	Managed as out patient	2	18	3	2	99	9	9	999	Y	0	0	0	0	0	0	0	0	0	0	0	0	0	0	0	0	1		2			2
897	2019-03-02 11:52:49	rgebeyehu@clintonhealthaccess.org	2019-02-12	Remrim		CHAI		1	102	1002	40013	21/03/11	21/03/11	9	Managed as out patient	5	48	3	1	99	9	9	999	Y	0	0	0	0	0	0	0	0	0	0	0	0	0	0	0	0	1		2			2
898	2019-03-02 11:55:40	rgebeyehu@clintonhealthaccess.org	2019-02-12	Remrim		CHAI		1	102	1002	57075	21/03/11	21/03/11	9	Managed as out patient	1	10	2	1	99	9	9	999	Y	0	0	0	0	0	0	0	0	0	0	0	0	0	0	0	0	1		2			2
899	2019-03-02 11:58:46	rgebeyehu@clintonhealthaccess.org	2019-02-12	Remrim		CHAI		1	102	1002	68342	24/03/11	24/03/11	9	Managed as out patient	3	30	3	1	99	9	9	99	Y	0	0	0	0	0	0	0	0	0	0	0	0	0	0	0	0	1		2			2
900	2019-03-02 12:02:23	rgebeyehu@clintonhealthaccess.org	2019-02-13	Remrim		CHAI		1	102	1002	84649	24/03/11	24/03/11	9	Managed as out patient	1	6	2	1	99	9	9	999	Y	0	0	0	0	0	0	0	0	0	0	0	0	0	0	0	0	1		2			2
901	2019-03-02 12:05:42	rgebeyehu@clintonhealthaccess.org	2019-02-12	Remrim		CHAI		1	102	1002	76947	24/03/11	24/03/11	9	Managed as out patient	1	3	2	1	99	9	9	999	Y	0	0	0	0	0	0	0	0	0	0	0	0	0	0	0	0	1		2			2
902	2019-03-02 12:10:10	rgebeyehu@clintonhealthaccess.org	2019-02-12	Remrim		CHAI		1	102	1002	84919	25/03/11	25/03/11	9	Managed as out patient	4	36	3	1	99	9	9	999	Y	0	0	0	0	0	0	0	0	0	0	0	0	0	0	0	0	1		2			2
903	2019-03-02 12:13:23	rgebeyehu@clintonhealthaccess.org	2019-02-12	Remrim		CHAI		1	102	1002	34261	25/03/11	25/03/11	9	Managed as out patient	2	22	3	1	99	9	9	999	Y	0	0	0	0	0	0	0	0	0	0	0	0	0	0	0	0	1		2			2
904	2019-03-02 12:16:41	rgebeyehu@clintonhealthaccess.org	2019-02-12	Remrim		CHAI		1	102	1002	84818	26/03/11	26/03/11	9	Managed as out patient	3	24	3	1	99	9	9	999	Y	0	0	0	0	0	0	0	0	0	0	0	0	0	0	0	0	1		2			2
905	2019-03-02 12:22:18	rgebeyehu@clintonhealthaccess.org	2019-02-12	Remrim		CHAI		1	102	1002	65133	26/03/11	26/03/11	9	Managed as out patient	1	11	2	1	99	9	9	999	Y	0	0	0	0	0	0	0	0	0	0	0	0	0	0	0	0	1		2			2
906	2019-03-02 12:28:21	rgebeyehu@clintonhealthaccess.org	2019-02-12	Remrim		CHAI		1	102	1002	30197	26/03/11	26/03/11	9	Managed as out patient	2	21	3	1	99	9	9	999	Y	0	0	0	0	0	0	0	0	0	0	0	0	0	0	0	0	1		2			2
907	2019-03-02 12:34:01	rgebeyehu@clintonhealthaccess.org	2019-02-12	Remrim		CHAI		1	102	1002	66570	26/03/11	26/03/11	9	Managed as out patient	1	8	2	1	99	9	9	999	Y	0	0	0	0	0	0	0	0	0	0	0	0	0	0	0	0	1		2			2
908	2019-03-02 12:38:08	rgebeyehu@clintonhealthaccess.org	2019-02-12	Remrim		CHAI		1	102	1002	75220	26/03/11	26/03/11	9	Managed as out patient	1	5	2	1	99	9	9	999	Y	0	0	0	0	0	0	0	0	0	0	0	0	0	0	0	0	1		2			2
909	2019-03-02 12:40:45	rgebeyehu@clintonhealthaccess.org	2019-02-12	Remrim		CHAI		1	102	1002	84550	27/03/11	27/03/11	9	Managed as out patient	1	3	2	2	99	9	9	999	Y	0	0	0	0	0	0	0	0	0	0	0	0	0	0	0	0	1		2			2
910	2019-03-02 12:44:05	rgebeyehu@clintonhealthaccess.org	2019-02-12	Remrim		CHAI		1	102	1002	56291	29/03/11	29/03/11	9	Managed as out patient	1	10	2	1	99	9	9	999	Y	0	0	0	0	0	0	0	0	0	0	0	0	0	0	0	0	1		2			2
911	2019-03-02 12:47:09	rgebeyehu@clintonhealthaccess.org	2019-02-12	Remrim		CHAI		1	102	1002	80256	29/03/11	29/03/11	9	Managed as out patient	1	3	2	2	99	9	9	999	Y	0	0	0	0	0	0	0	0	0	0	0	0	0	0	0	0	1		2			2
912	2019-03-02 12:50:07	rgebeyehu@clintonhealthaccess.org	2019-02-12	Remrim		CHAI		1	102	1002	62697	29/03/11	29/03/11	9	Managed as out patient	4	36	3	1	99	9	9	999	Y	0	0	0	0	0	0	0	0	0	0	0	0	0	0	0	0	1		2			2
913	2019-03-02 12:52:57	rgebeyehu@clintonhealthaccess.org	2019-02-12	Remrim		CHAI		1	102	1002	80811	29/03/11	29/03/11	9	Managed as out patient	3	24	3	1	99	9	9	999	Y	0	0	0	0	0	0	0	0	0	0	0	0	0	0	0	0	1		2			2
914	2019-03-02 12:59:28	rgebeyehu@clintonhealthaccess.org	2019-02-12	Remrim		CHAI		1	102	1002	27490	2011-01-02	2011-01-02	9	Managed as out patient	3	24	3	1	99	9	9	999	Y	0	0	0	0	0	0	0	0	0	0	0	0	0	0	0	0	1		2			2
915	2019-03-02 13:02:49	rgebeyehu@clintonhealthaccess.org	2019-02-12	Remrim		CHAI		1	102	1002	41926	2011-01-02	2011-01-02	9	Managed as out patient	2	15	3	1	99	9	9	999	Y	0	0	0	0	0	0	0	0	0	0	0	0	0	0	0	0	1		2			2
916	2019-03-02 13:05:58	rgebeyehu@clintonhealthaccess.org	2019-02-12	Remrim		CHAI		1	102	1002	81027	2011-02-02	2011-02-02	9	Managed as out patient	3	30	3	1	99	9	9	999	Y	0	0	0	0	0	0	0	0	0	0	0	0	0	0	0	0	1		2			2
917	2019-03-02 13:08:56	rgebeyehu@clintonhealthaccess.org	2019-02-12	Remrim		CHAI		1	102	1002	27159	2011-03-02	2011-03-02	9	Managed as out patient	2	12	3	1	99	9	9	999	Y	0	0	0	0	0	0	0	0	0	0	0	0	0	0	0	0	1		2			2
918	2019-03-02 13:11:40	rgebeyehu@clintonhealthaccess.org	2019-02-12	Remrim		CHAI		1	102	1002	26293	2011-05-02	2011-05-02	9	Managed as out patient	3	24	3	2	99	9	9	999	Y	0	0	0	0	0	0	0	0	0	0	0	0	0	0	0	0	1		2			2
919	2019-03-02 13:14:54	rgebeyehu@clintonhealthaccess.org	2019-02-12	Remrim		CHAI		1	102	1002	49158	2011-07-03	2011-07-02	9	Managed as out patient	4	36	3	2	99	9	9	9	Y	0	0	0	0	0	0	0	0	0	0	0	0	0	0	0	0	1		2			2
920	2019-03-02 13:17:34	rgebeyehu@clintonhealthaccess.org	2019-02-12	Remrim		CHAI		1	102	1002	43581	2011-07-02	2011-07-02	9	Managed as out patient	2	15	3	1	99	9	9	999	Y	0	0	0	0	0	0	0	0	0	0	0	0	0	0	0	0	1		2			2
921	2019-03-03 09:41:06	rgebeyehu@clintonhealthaccess.org	2019-02-12	Remrim		CHAI		1	102	1002	71094	2011-09-02	2011-09-02	9	Managed as out patient	3	24	3	2	99	9	9	999	Y	0	0	0	0	0	0	0	0	0	0	0	0	0	0	0	0	1		2			2
922	2019-03-03 09:44:27	rgebeyehu@clintonhealthaccess.org	2019-02-12	Remrim		CHAI		1	102	1002	60278	2011-07-02	2011-07-02	9	Managed as out patient	4	36	3	1	99	9	9	999	Y	0	0	0	0	0	0	0	0	0	0	0	0	0	0	0	0	1		2			2
923	2019-03-03 09:47:21	rgebeyehu@clintonhealthaccess.org	2019-02-12	Remrim Gebeyehu		CHAI		1	102	1002	55890	2011-07-02	2011-07-02	9	Managed as out patient	1	7	2	2	99	9	9	999	Y	0	0	0	0	0	0	0	0	0	0	0	0	0	0	0	0	1		2			2
924	2019-03-03 09:55:53	rgebeyehu@clintonhealthaccess.org	2019-02-12	Remrim		CHAI		1	102	1002	74601	2011-08-02	2011-08-02	9	Managed as out patient	4	36	3	1	99	9	9	999	Y	0	0	0	0	0	0	0	0	0	0	0	0	0	0	0	0	1		2			2
925	2019-03-03 09:59:46	rgebeyehu@clintonhealthaccess.org	2019-02-12	Remrim		CHAI		1	102	1002	81738	2011-12-02	2011-12-02	9	Managed as out patient	1	6	2	2	99	9	9	999	Y	0	0	0	0	0	0	0	0	0	0	0	0	0	0	0	0	1		2			2
926	2019-03-03 10:02:36	rgebeyehu@clintonhealthaccess.org	2019-02-12	Remrim		CHAI		1	102	1002	81743	2011-12-02	2011-12-02	9	Managed as out patient	2	12	3	1	99	9	9	999	Y	0	0	0	0	0	0	0	0	0	0	0	0	0	0	0	0	1		2			2
927	2019-03-03 10:05:20	rgebeyehu@clintonhealthaccess.org	2019-02-12	Remrim		CHAI		1	102	1002	68050	2011-12-02	2011-12-02	9	Managed as out patient	3	24	3	2	99	9	9	999	Y	0	0	0	0	0	0	0	0	0	0	0	0	0	0	0	0	1		2			2
928	2019-03-03 10:07:56	rgebeyehu@clintonhealthaccess.org	2019-02-12	Remrim		CHAI		1	102	1002	81813	13/02/11	13/02/11	9	Managed as out patient	1	3	2	2	99	9	9	999	Y	0	0	0	0	0	0	0	0	0	0	0	0	0	0	0	0	1		2			2
929	2019-03-03 10:10:44	rgebeyehu@clintonhealthaccess.org	2019-02-12	Remrim		CHAI		1	102	1002	66310	13/02/11	13/02/11	9	Managed as out patient	1	10	2	1	99	9	9	999	Y	0	0	0	0	0	0	0	0	0	0	0	0	0	0	0	0	1		2			2
930	2019-03-03 10:13:25	rgebeyehu@clintonhealthaccess.org	2019-02-12	Remrim		CHAI		1	102	1002	65656	13/02/11	13/02/11	9	Managed as out patient	1	7	2	2	99	9	9	999	Y	0	0	0	0	0	0	0	0	0	0	0	0	0	0	0	0	1		2			2
931	2019-03-03 10:16:09	rgebeyehu@clintonhealthaccess.org	2019-02-12	Remrim		CHAI		1	102	1002	61612	14/02/11	14/02/11	9	Managed as out patient	2	14	3	1	99	9	9	999	Y	0	0	0	0	0	0	0	0	0	0	0	0	0	0	0	0	1		2			2
932	2019-03-03 10:18:44	rgebeyehu@clintonhealthaccess.org	2019-02-12	Remrim		CHAI		1	102	1002	81953	14/02/11	14/02/11	9	Managed as out patient	2	12	3	2	99	9	9	999	Y	0	0	0	0	0	0	0	0	0	0	0	0	0	0	0	0	1		2			2
933	2019-03-03 10:21:35	rgebeyehu@clintonhealthaccess.org	2019-02-12	Remrim		CHAI		1	102	1002	70752	14/02/11	14/02/11	9	Managed as out patient	2	12	3	1	99	9	9	999	Y	0	0	0	0	0	0	0	0	0	0	0	0	0	0	0	0	1		2			2
934	2019-03-03 10:25:49	rgebeyehu@clintonhealthaccess.org	2019-02-12	Remrim		CHAI		1	102	1002	75972	14/02/11	14/02/11	9	Managed as out patient	1	3	2	2	99	9			Y	0	0	0	0	0	0	0	0	0	0	0	0	0	0	0	0	1		2			2
935	2019-03-03 10:29:02	rgebeyehu@clintonhealthaccess.org	2019-02-12	Remrim		CHAI		1	102	1002	54425	14/02/11	14/02/11	9	Managed as out patient	2	20	3	1	99	9	9	999	Y	0	0	0	0	0	0	0	0	0	0	0	0	0	0	0	0	1		2			2
936	2019-03-03 10:31:33	rgebeyehu@clintonhealthaccess.org	2019-02-12	Remrim		CHAI		1	102	1002	39595	14/02/11	14/02/11	9	Managed as out patient	1	9	2	1	99	9	9	999	Y	0	0	0	0	0	0	0	0	0	0	0	0	0	0	0	0	1		2			2
937	2019-03-03 10:34:24	rgebeyehu@clintonhealthaccess.org	2019-02-12	Remrim		CHAI		1	102	1002	50444	14/02/11	14/02/11	9	Managed as out patient	4	36	3	1	99	9	9	999	Y	0	0	0	0	0	0	0	0	0	0	0	0	0	0	0	0	1		2			2
938	2019-03-03 10:37:21	rgebeyehu@clintonhealthaccess.org	2019-02-12	Remrim		CHAI		1	102	1002	67420	15/02/11	15/02/11	9	Managed as out patient	1	6	2	1	99	9	9	999	Y	0	0	0	0	0	0	0	0	0	0	0	0	0	0	0	0	1		2			2
939	2019-03-03 10:40:03	rgebeyehu@clintonhealthaccess.org	2019-02-12	Remrim		CHAI		1	102	1002	76536	15/02/11	15/02/11	9	Managed as out patient	1	6	2	1	99	9	9	999	Y	0	0	0	0	0	0	0	0	0	0	0	0	0	0	0	0	1		2			2
940	2019-03-03 10:44:18	rgebeyehu@clintonhealthaccess.org	2019-02-12	Remrim		CHAI		1	102	1002	73119	15/02/11	15/02/11	9	Managed as out patient	1	6	2	2	99	9	9	999	Y	0	0	0	0	0	0	0	0	0	0	0	0	0	0	0	0	1		2			2
941	2019-03-03 10:47:15	rgebeyehu@clintonhealthaccess.org	2019-02-12	Remrim		CHAI		1	102	1002	39300	15/02/11	15/02/11	9	Managed as out patient	3	31	3	1	99	9	9	999	Y	0	0	0	0	0	0	0	0	0	0	0	0	0	0	0	0	1		2			2
942	2019-03-03 10:59:48	rgebeyehu@clintonhealthaccess.org	2019-02-12	Remrim		CHAI		1	102	1002	20700	15/02/11	15/02/11	9	Managed as out patient	1	8	2	1	99	9	9	999	Y	0	0	0	0	0	0	0	0	0	0	0	0	0	0	0	0	1		2			2
943	2019-03-03 11:02:59	rgebeyehu@clintonhealthaccess.org	2019-02-12	Remrim Gebeyehu		CHAI		1	102	1002	77502	15/02/11	15/02/11	9	Managed as out patient	3	24	3	1	99	9	9	999	Y	0	0	0	0	0	0	0	0	0	0	0	0	0	0	0	0	1		2			2
944	2019-03-03 11:05:32	rgebeyehu@clintonhealthaccess.org	2019-02-12	Remrim		CHAI		1	102	1002	82148	16/02/11	16/02/11	9	Managed as out patient	1	5	2	1	99	9	9	999	Y	0	0	0	0	0	0	0	0	0	0	0	0	0	0	0	0	1		2			2
945	2019-03-03 11:08:10	rgebeyehu@clintonhealthaccess.org	2019-02-12	Remrim		CHAI		1	102	1002	40318	16/02/11	16/02/11	9	Managed as out patient	2	18	3	2	99	9	9	999	Y	0	0	0	0	0	0	0	0	0	0	0	0	0	0	0	0	1		2			2
946	2019-03-03 11:10:50	rgebeyehu@clintonhealthaccess.org	2019-02-12	Remrim		CHAI		1	102	1002	82299	18/02/11	18/02/11	9	Managed as out patient	1	11	2	2	99	9	9	999	Y	0	0	0	0	0	0	0	0	0	0	0	0	0	0	0	0	1		2			2
947	2019-03-03 11:14:20	rgebeyehu@clintonhealthaccess.org	2019-02-12	Remrim		CHAI		1	102	1002	66441	19/02/11	19/02/11	9	Managed as out patient	1	4	2	2	99	9	9	999	Y	0	0	0	0	0	0	0	0	0	0	0	0	0	0	0	0	1		2			2
948	2019-03-03 11:17:00	rgebeyehu@clintonhealthaccess.org	2019-02-12	Remrim		CHAI		1	102	1002	82295	19/02/11	19/02/11	9	Managed as out patient	5	48	3	2	99	9	9	999	Y	0	0	0	0	0	0	0	0	0	0	0	0	0	0	0	0	1		2			2
949	2019-03-03 11:19:39	rgebeyehu@clintonhealthaccess.org	2019-02-12	Remrim		CHAI		1	102	1002	82415	20/02/11	20/02/11	9	Managed as out patient	1	5	2	1	99	9	9	999	Y	0	0	0	0	0	0	0	0	0	0	0	0	0	0	0	0	1		2			2
950	2019-03-03 11:22:25	rgebeyehu@clintonhealthaccess.org	2019-02-12	Remrim		CHAI		1	102	1002	82465	21/02/11	21/02/11	9	Managed as out patient	5	59	3	1	99	9	9	999	Y	0	0	0	0	0	0	0	0	0	0	0	0	0	0	0	0	1		2			2
951	2019-03-03 11:25:04	rgebeyehu@clintonhealthaccess.org	2019-02-12	Remrim		CHAI		1	102	1002	55812	21/02/11	21/02/11	9	Managed as out patient	2	18	3	2	99	9	9	999	Y	0	0	0	0	0	0	0	0	0	0	0	0	0	0	0	0	1		2			2
952	2019-03-03 11:29:15	rgebeyehu@clintonhealthaccess.org	2019-02-12	Remrim		CHAI		1	102	1002	71664	21/02/11	21/02/11	9	Managed as out patient	1	5	2	1	99	9	9	999	Y	0	0	0	0	0	0	0	0	0	0	0	0	0	0	0	0	1		2			2
953	2019-03-03 11:32:50	rgebeyehu@clintonhealthaccess.org	2019-02-12	Remrim		CHAI		1	102	1002	82520	21/02/11	21/02/11	9	Managed as out patient	2	14	3	2	99	9	9	999	Y	0	0	0	0	0	0	0	0	0	0	0	0	0	0	0	0	1		2			2
954	2019-03-03 11:35:32	rgebeyehu@clintonhealthaccess.org	2019-02-12	Remrim		CHAI		1	102	1002	12148	21/02/11	21/02/11	9	Managed as out patient	3	30	3	1	99	9	9	999	Y	0	0	0	0	0	0	0	0	0	0	0	0	0	0	0	0	1		2			2
955	2019-03-03 11:40:43	rgebeyehu@clintonhealthaccess.org	2019-02-12	Remrim		CHAI		1	102	1002	82614	21/02/11	21/20/11	9	Managed as out patient	2	13	3	1	99	9	9	999	Y	0	0	0	0	0	0	0	0	0	0	0	0	0	0	0	0	1		2			2
956	2019-03-03 11:43:45	rgebeyehu@clintonhealthaccess.org	2019-02-12	Remrim		CHAI		1	102	1002	56842	23/02/11	23/02/11	9	Managed as out patient	2	12	3	2	99	9	9	999	Y	0	0	0	0	0	0	0	0	0	0	0	0	0	0	0	0	1		2			2
957	2019-03-03 11:46:54	rgebeyehu@clintonhealthaccess.org	2019-02-12	Remrim		CHAI		1	102	1002	82505	26/02/11	26/02/11	9	Managed as out patient	2	14	3	2	99	9	9	999	Y	0	0	0	0	0	0	0	0	0	0	0	0	0	0	0	0	1		2			2
958	2019-03-03 11:49:36	rgebeyehu@clintonhealthaccess.org	2019-02-12	Remrim		CHAI		1	102	1002	58271	26/02/11	26/02/11	9	Managed as out patient	2	12	3	2	99	9	9	999	Y	0	0	0	0	0	0	0	0	0	0	0	0	0	0	0	0	1		2			2
959	2019-03-03 11:53:47	rgebeyehu@clintonhealthaccess.org	2019-02-12	Remrim		CHAI		1	102	1002	75055	27/02/11	27/02/11	9	Managed as out patient	1	4	2	2	99	9	9	999	Y	0	0	0	0	0	0	0	0	0	0	0	0	0	0	0	0	1		2			2
960	2019-03-03 11:56:20	rgebeyehu@clintonhealthaccess.org	2019-02-12	Remrim		CHAI		1	102	1002	80741	27/02/11	27/02/11	9	Managed as out patient	1	3	2	1	99	9	9	999	Y	0	0	0	0	0	0	0	0	0	0	0	0	0	0	0	0	1		2			2
961	2019-03-03 11:59:29	rgebeyehu@clintonhealthaccess.org	2019-02-12	Remrim		CHAI		1	102	1002	82959	28/02/11	28/02/11	9	Managed as out patient	1	3	2	2	99	9	9	999	Y	0	0	0	0	0	0	0	0	0	0	0	0	0	0	0	0	1		2			2
962	2019-03-03 12:02:13	rgebeyehu@clintonhealthaccess.org	2019-02-12	Remrim		CHAI		1	102	1002	69625	28/02/11	28/02/11	9	Managed as out patient	1	7	2	2	99	9	9	999	Y	0	0	0	0	0	0	0	0	0	0	0	0	0	0	0	0	1		2			2
963	2019-03-03 12:04:57	rgebeyehu@clintonhealthaccess.org	2019-02-12	Remrim		CHAI		1	102	1002	83042	29/02/11	29/02/11	9	Managed as out patient	1	8	2	1	99	9	9	999	Y	0	0	0	0	0	0	0	0	0	0	0	0	0	0	0	0	1		2			2
964	2019-03-03 12:07:51	rgebeyehu@clintonhealthaccess.org	2019-02-12	Remrim		CHAI		1	102	1002	73811	29/02/11	29/02/11	9	Managed as out patient	1	4	2	1	99	9	9	999	Y	0	0	0	0	0	0	0	0	0	0	0	0	0	0	0	0	1		2			2
965	2019-03-03 12:10:44	rgebeyehu@clintonhealthaccess.org	2019-02-12	Remrim		CHAI		1	102	1002	83054	29/02/11	29/02/11	9	Managed as out patient	1	3	2	2	99	9		999	Y	0	0	0	0	0	0	0	0	0	0	0	0	0	0	0	0	1		2			2
966	2019-03-03 12:13:43	rgebeyehu@clintonhealthaccess.org	2019-02-13	Remrim		CHAI		1	102	1002	83169	30/02/11	30/02/11	9	Managed as out patient	2	12	3	1	99	9	9	999	Y	0	0	0	0	0	0	0	0	0	0	0	0	0	0	0	0	1		2			2
967	2019-03-03 12:16:32	rgebeyehu@clintonhealthaccess.org	2019-02-12	Remrim		CHAI		1	102	1002	78827	2011-03-03	2011-03-03	9	Managed as out patient	1	4	2	2	99	9	9	999	Y	0	0	0	0	0	0	0	0	0	0	0	0	0	0	0	0	1		2			2
968	2019-03-03 12:19:29	rgebeyehu@clintonhealthaccess.org	2019-02-12	Remrim		CHAI		1	102	1002	83362	2011-03-03	2011-03-03	9	Managed as out patient	5	48	3	1	99	9	9	999	Y	0	0	0	0	0	0	0	0	0	0	0	0	0	0	0	0	1		2			2
969	2019-03-03 12:22:31	rgebeyehu@clintonhealthaccess.org	2019-02-12	Remrim		CHAI		1	102	1002	69398	2011-04-03	2011-04-03	9	Managed as out patient	2	20	3	2	99	9	9	999	Y	0	0	0	0	0	0	0	0	0	0	0	0	0	0	0	0	1		2			2
970	2019-03-03 12:25:20	rgebeyehu@clintonhealthaccess.org	2019-02-12	Remrim		CHAI		1	102	1002	41926	2011-06-02	2011-06-03	9	Managed as out patient	2	14	3	1	99	9	9	999	Y	0	0	0	0	0	0	0	0	0	0	0	0	0	0	0	0	1		2			2
971	2019-03-03 12:31:42	rgebeyehu@clintonhealthaccess.org	2019-02-12	Remrim		CHAI		1	102	1002	75549	2011-06-03	2011-06-03	9	Managed as out patient	1	5	2	1	99	9	9	999	Y	0	0	0	0	0	0	0	0	0	0	0	0	0	0	0	0	1		2			2
972	2019-03-03 12:34:35	rgebeyehu@clintonhealthaccess.org	2019-02-12	Remrim		CHAI		1	102	1002	50486	2022-07-03	2011-07-03	9	Managed as out patient	2	18	3	1	99	9	9	999	Y	0	0	0	0	0	0	0	0	0	0	0	0	0	0	0	0	1		2			2
973	2019-03-03 12:37:03	rgebeyehu@clintonhealthaccess.org	2019-02-12	Remrim		CHAI		1	102	1002	83001	2011-07-03	2011-07-03	9	Managed as out patient	1	3	2	2	99	9	9	999	Y	0	0	0	0	0	0	0	0	0	0	0	0	0	0	0	0	1		2			2
974	2019-03-03 12:39:37	rgebeyehu@clintonhealthaccess.org	2019-02-12	Remrim		CHAI		1	102	1002	74407	2011-10-03	2011-10-03	9	Managed as out patient	1	5	2	2	99	9	9	999	Y	0	0	0	0	0	0	0	0	0	0	0	0	0	0	0	0	1		2			2
975	2019-03-03 12:44:46	rgebeyehu@clintonhealthaccess.org	2019-02-12	Remrim		CHAI		1	102	1002	74093	2011-10-03	2011-10-03	9	Managed as out patient	1	5	2	1	99	9	9	999	Y	0	0	0	0	0	0	0	0	0	0	0	0	0	0	0	0	1		2			2
976	2019-03-03 12:47:37	rgebeyehu@clintonhealthaccess.org	2019-02-12	Remrim		CHAI		1	102	1002	66773	2011-10-03	2011-10-03	9	Managed as out patient	1	6	2	2	99	9	9	999	Y	0	0	0	0	0	0	0	0	0	0	0	0	0	0	0	0	1		2			2
977	2019-03-03 12:51:49	rgebeyehu@clintonhealthaccess.org	2019-02-12	Remrim		CHAI		1	102	1002	33169	2011-10-03	2011-10-03	9	Managed as out patient	2	13	3	1	99	9	9	999	Y	0	0	0	0	0	0	0	0	0	0	0	0	0	0	0	0	1		2			2
978	2019-03-03 12:55:31	rgebeyehu@clintonhealthaccess.org	2019-02-12	Remrim		CHAI		1	102	1002	83505	2011-12-03	2011-12-03	9	Managed as out patient	3	30	3	1	99	9	9	999	Y	0	0	0	0	0	0	0	0	0	0	0	0	0	0	0	0	1		2			2
979	2019-03-03 12:58:17	rgebeyehu@clintonhealthaccess.org	2019-02-12	Remrim		CHAI		1	102	1002	12451	2011-12-03	2011-12-03	9	Managed as out patient	2	13	3	1	99	9	9	999	Y	0	0	0	0	0	0	0	0	0	0	0	0	0	0	0	0	1		2			2
980	2019-03-04 09:21:53	rgebeyehu@clintonhealthaccess.org	2019-02-12	Remrim		CHAI		1	102	1002	52451	13/03/11	13/03/11	9	Managed as out patient	2	13	3	1	99	9	9	999	Y	0	0	0	0	0	0	0	0	0	0	0	0	0	0	0	0	1		2			2
981	2019-03-04 09:36:28	rgebeyehu@clintonhealthaccess.org	2019-02-12	Remrim		CHAI		1	102	1002	83974	13/03/11	13/03/11	9	Managed as out patient	3	24	3	1	99	9	9	999	Y	0	0	0	0	0	0	0	0	0	0	0	0	0	0	0	0	1		2			2
982	2019-03-04 09:43:19	rgebeyehu@clintonhealthaccess.org	2019-02-12	Remrim		CHAI		1	102	1002	74812	14/03/11	14/03/11	9	Managed as out patient	1	8	2	1	99	9	9	999	Y	0	0	0	0	0	0	0	0	0	0	0	0	0	0	0	0	1		2			2
983	2019-03-04 09:51:41	rgebeyehu@clintonhealthaccess.org	2019-02-12	Remrim		CHAI		1	102	1002	63739	17/03/11	17/03/11	9	Managed as out patient	1	10	2	1	99	9	9	999	Y	0	0	0	0	0	0	0	0	0	0	0	0	0	0	0	0	1		2			2
984	2019-03-04 09:57:48	rgebeyehu@clintonhealthaccess.org	2019-02-12	Remrim		CHAI		1	102	1002	69058	17/03/11	17/03/11	9	Managed as out patient	1	5	2	1	99	9	9	999	Y	0	0	0	0	0	0	0	0	0	0	0	0	0	0	0	0	1		2			2
985	2019-03-04 10:25:35	rgebeyehu@clintonhealthaccess.org	2019-02-12	Remrim		CHAI		1	102	1002	54072	18/03/11	18/03/11	9	Managed as out patient	1	4	2	1	99	9	9	999	Y	0	0	0	0	0	0	0	0	0	0	0	0	0	0	0	0	1		2			2
986	2019-03-04 10:40:32	rgebeyehu@clintonhealthaccess.org	2019-02-12	Remrim		CHAI		1	102	1002	65341	18/03/11	18/03/11	9	Managed as out patient	1	10	2	2	99	9	9	999	Y	0	0	0	0	0	0	0	0	0	0	0	0	0	0	0	0	1		2			2
987	2019-03-04 10:55:40	rgebeyehu@clintonhealthaccess.org	2019-02-12	Remrim		CHAI		1	102	1002	84259	18/03/11	18/03/11	9	managed as out patient	2	12	3	2	99	9	9	999	Y	0	0	0	0	0	0	0	0	0	0	0	0	0	0	0	0	1		2			2
988	2019-03-04 11:02:41	rgebeyehu@clintonhealthaccess.org	2019-02-12	CHAI		CHAI		1	102	1002	67037	19/03/11	19/03/11	9	Managed as out patient	3	24	3	1	99	9	9	999	Y	0	0	0	0	0	0	0	0	0	0	0	0	0	0	0	0	1		2			2
989	2019-03-04 11:05:31	rgebeyehu@clintonhealthaccess.org	2019-02-12	Remrim		CHAI		1	102	1002	76298	19/03/11	19/03/11	9	Managed as out patient	1	5	2	2	99	9	9	999	Y	0	0	0	0	0	0	0	0	0	0	0	0	0	0	0	0	1		2			2
990	2019-03-04 11:08:39	rgebeyehu@clintonhealthaccess.org	2019-02-12	Remrim		CHAI		1	102	1002	84322	19/03/11	19/03/11	9	Managed as out patient	2	13	3	1	99	9	9	999	Y	0	0	0	0	0	0	0	0	0	0	0	0	0	0	0	0	1		2			2
991	2019-03-04 11:11:19	rgebeyehu@clintonhealthaccess.org	2019-02-12	Remrim		CHAI		1	102	1002	3400	19/03/11	19/03/11	9	Managed as out patient	3	24	3	1	99	9	9	999	Y	0	0	0	0	0	0	0	0	0	0	0	0	0	0	0	0	1		2			2
992	2019-03-04 11:14:17	rgebeyehu@clintonhealthaccess.org	2019-02-12	Remrim		CHAI		1	102	1002	84402	20/03/11	20/03/11	9	Managed as out patient	1	3	2	1	99	9	9	999	Y	0	0	0	0	0	0	0	0	0	0	0	0	0	0	0	0	1		2			2
993	2019-03-04 11:17:07	rgebeyehu@clintonhealthaccess.org	2019-02-12	Remrim		CHAI		1	102	1002	20777	20/03/11	20/03/11	9	Managed as out patient	3	31	3	2	99	9	9	999	Y	0	0	0	0	0	0	0	0	0	0	0	0	0	0	0	0	1		2			2
994	2019-03-04 11:19:51	rgebeyehu@clintonhealthaccess.org	2019-02-12	Remrim		CHAI		1	102	1002	84442	20/03/11	20/03/11	9	Managed as out patient	1	9	2	2	99	9	9	999	Y	0	0	0	0	0	0	0	0	0	0	0	0	0	0	0	0	1		2			2
995	2019-03-04 11:22:40	rgebeyehu@clintonhealthaccess.org	2019-02-12	Remrim		CHAI		1	102	1002	82045	24/03/11	24/03/11	9	Managed as out patient	1	11	2	1	99	9	9	999	Y	0	0	0	0	0	0	0	0	0	0	0	0	0	0	0	0	1		2			2
996	2019-03-04 11:25:39	rgebeyehu@clintonhealthaccess.org	2019-02-12	Remrim		CHAI		1	102	1002	51686	24/03/11	24/03/11	9	Managed as out patient	2	13	3	2	99	9	9	999	Y	0	0	0	0	0	0	0	0	0	0	0	0	0	0	0	0	1		2			2
997	2019-03-04 11:28:55	rgebeyehu@clintonhealthaccess.org	2019-02-13	Remrim		CHAI		1	102	1002	74982	24/03/11	24/03/11	9	Managed as out patient	1	5	2	1	99	9	9	999	Y	0	0	0	0	0	0	0	0	0	0	0	0	0	0	0	0	1		2			2
998	2019-03-04 11:31:35	rgebeyehu@clintonhealthaccess.org	2019-02-12	Remrim		CHAI		1	102	1002	64482	25/03/11	25/03/11	9	Managed as out patient	1	9	2	1	99	9	9	999	Y	0	0	0	0	0	0	0	0	0	0	0	0	0	0	0	0	1		2			2
999	2019-03-04 11:34:21	rgebeyehu@clintonhealthaccess.org	2019-02-12	Remrim		CHAI		1	102	1002	82344	25/03/11	25/03/11	9	Managed as out patient	1	9	2	1	99	9	9	999	Y	0	0	0	0	0	0	0	0	0	0	0	0	0	0	0	0	1		2			2
1000	2019-03-04 11:37:34	rgebeyehu@clintonhealthaccess.org	2019-02-12	Remrim		CHAI		1	102	1002	54234	25/03/11	25/03/11	9	Managed as out patient	3	28	3	1	99	9	9	999	Y	0	0	0	0	0	0	0	0	0	0	0	0	0	0	0	0	1		2			2
1001	2019-03-04 11:40:08	rgebeyehu@clintonhealthaccess.org	2019-02-12	Remrim		CHAI		1	102	1002	8251	26/03/11	26/03/11	9	Managed as out patient	3	24	3	2	99	9	9	999	Y	0	0	0	0	0	0	0	0	0	0	0	0	0	0	0	0	1		2			2
1002	2019-03-04 11:43:01	rgebeyehu@clintonhealthaccess.org	2019-02-12	Remrim		CHAI		1	102	1002	62463	27/03/11	27/03/11	9	Managed as out patient	3	24	3	2	99	9	9	999	Y	0	0	0	0	0	0	0	0	0	0	0	0	0	0	0	0	1		2			2
1003	2019-03-04 11:46:37	rgebeyehu@clintonhealthaccess.org	2019-02-12	Remrim		CHAI		1	102	1002	24522	27/02/11	27/03/11	9	Managed as out patient	5	48	3	2	99	9	9	999	Y	0	0	0	0	0	0	0	0	0	0	0	0	0	0	0	0	1		2			2
1004	2019-03-04 11:55:29	rgebeyehu@clintonhealthaccess.org	2019-02-12	Remrim		CHAI		1	102	1002	76947	28/03/11	28/03/11	9	Managed as out patient	1	4	2	1	99	9	9	999	Y	0	0	0	0	0	0	0	0	0	0	0	0	0	0	0	0	1		2			2
1005	2019-03-04 12:01:44	rgebeyehu@clintonhealthaccess.org	2019-02-12	Remrim		CHAI		1	102	1002	84736	28/03/11	28/03/11	9	Managed as out patient	1	3	2	1	99	9	9	999	Y	0	0	0	0	0	0	0	0	0	0	0	0	0	0	0	0	1		2			2
1006	2019-03-04 12:13:13	rgebeyehu@clintonhealthaccess.org	2019-02-12	Remrim		CHAI		1	102	1002	36205	2011-01-04	2011-01-04	9	Managed as out patient	4	36	3	1	99	9	9	999	Y	0	0	0	0	0	0	0	0	0	0	0	0	0	0	0	0	1		2			2
1007	2019-03-04 12:15:52	rgebeyehu@clintonhealthaccess.org	2019-02-12	Remrim		CHAI		1	102	1002	54420	2011-01-04	2011-01-04	9	Managed as out patient	1	8	2	1	99	9	9	999	Y	0	0	0	0	0	0	0	0	0	0	0	0	0	0	0	0	1		2			2
1008	2019-03-04 12:19:08	rgebeyehu@clintonhealthaccess.org	2019-02-12	Remrim		CHAI		1	102	1002	83125	2011-01-04	2011-01-04	9	Managed as out patient	1	3	2	1	99	9	9	999	Y	0	0	0	0	0	0	0	0	0	0	0	0	0	0	0	0	1		2			2
1009	2019-03-04 15:32:23	rgebeyehu@clintonhealthaccess.org	2019-02-12	Remrim		CHAI		1	102	1002	52069	2011-02-04	2011-02-04	9	Managed as out patient	2	16	3	1	99	9	9	999	Y	0	0	0	0	0	0	0	0	0	0	0	0	0	0	0	0	1		2			2
1010	2019-03-04 15:35:38	rgebeyehu@clintonhealthaccess.org	2019-02-12	Remrim		CHAI		1	102	1002	67947	2011-02-04	2011-02-04	9	Managed as out patient	1	8	2	1	99	9	9	999	Y	0	0	0	0	0	0	0	0	0	0	0	0	0	0	0	0	1		2			2
1011	2019-03-04 15:38:13	rgebeyehu@clintonhealthaccess.org	2019-02-12	Remrim		CHAI		1	102	1002	80524	2011-03-04	2011-03-04	9	managed as out patient	1	10	2	2	99	9	9	999	Y	0	0	0	0	0	0	0	0	0	0	0	0	0	0	0	0	1		2			2
1012	2019-03-04 15:40:48	rgebeyehu@clintonhealthaccess.org	2019-02-12	Remrim		CHAI		1	102	1002	22745	2011-03-04	2011-03-04	9	managed as out patient	2	18	3	2	99	9	9	999	Y	0	0	0	0	0	0	0	0	0	0	0	0	0	0	0	0	1		2			2
1013	2019-03-04 15:43:37	rgebeyehu@clintonhealthaccess.org	2019-02-12	Remrim		CHAI		1	102	1002	85308	2011-04-04	2011-04-04	9	Managed as out patient	1	5	2	2	99	9	9	999	Y	0	0	0	0	0	0	0	0	0	0	0	0	0	0	0	0	1		2			2
1014	2019-03-04 15:46:33	rgebeyehu@clintonhealthaccess.org	2019-02-13	Remrim		CHAI		1	102	1002	82022	2011-04-04	2011-04-04	9	Managed as out patient	1	3	2	2	99	9	9	999	Y	0	0	0	0	0	0	0	0	0	0	0	0	0	0	0	0	1		2			2
1015	2019-03-04 15:49:16	rgebeyehu@clintonhealthaccess.org	2019-02-12	Remrim		CHAI		1	102	1002	69008	2011-04-04	2011-04-04	9	Managed as out patient	1	8	2	2	99	9	9	999	Y	0	0	0	0	0	0	0	0	0	0	0	0	0	0	0	0	1		2			2
1016	2019-03-04 15:52:06	rgebeyehu@clintonhealthaccess.org	2019-02-12	Remrim		CHAI		1	102	1002	82259	2011-05-04	2011-05-04	9	Managed as out patient	1	4	2	1	99	9	9	999	Y	0	0	0	0	0	0	0	0	0	0	0	0	0	0	0	0	1		2			2
1017	2019-03-04 15:55:50	rgebeyehu@clintonhealthaccess.org	2019-02-12	Remrim		CHAI		1	102	1002	85325	2011-05-04	2011-05-04	9	Managed as out patient	1	3	2	1	99	9	9	999	Y	0	0	0	0	0	0	0	0	0	0	0	0	0	0	0	0	1		2			2
1018	2019-03-04 15:59:19	rgebeyehu@clintonhealthaccess.org	2019-02-12	Remrim		CHAI		1	102	1002	37627	2011-05-04	2011-05-04	9	Managed as out patient	5	48	3	2	99	9	9	999	Y	0	0	0	0	0	0	0	0	0	0	0	0	0	0	0	0	1		2			2
1019	2019-03-04 16:18:13	rgebeyehu@clintonhealthaccess.org	2019-02-12	Remrim		CHAI		1	102	1002	66711	2011-08-04	2011-08-04	9	Managed as out patient	2	12	3	1	99	9	9	999	Y	0	0	0	0	0	0	0	0	0	0	0	0	0	0	0	0	1		2			2
1020	2019-03-04 16:22:43	rgebeyehu@clintonhealthaccess.org	2019-02-12	Remrim		CHAI		1	102	1002	73553	2011-08-04	2011-08-04	9	Managed as out patient	1	8	2	1	99	9	9	999	Y	0	0	0	0	0	0	0	0	0	0	0	0	0	0	0	0	1		2			2
1021	2019-03-04 16:26:17	rgebeyehu@clintonhealthaccess.org	2019-02-13	Remrim		CHAI		1	102	1002	12934	2011-08-04	2011-08-04	9	Managed as out patient	3	24	3	1	99	9	9	999	Y	0	0	0	0	0	0	0	0	0	0	0	0	0	0	0	0	1		2			2
1022	2019-03-04 16:29:28	rgebeyehu@clintonhealthaccess.org	2019-02-12	Remrim		CHAI		1	102	1002	82197	2011-09-04	2011-09-04	9	managed as out patient	1	7	2	2	99	9	9	999	Y	0	0	0	0	0	0	0	0	0	0	0	0	0	0	0	0	1		2			2
1023	2019-03-04 16:32:31	rgebeyehu@clintonhealthaccess.org	2019-02-12	Remrim		CHAI		1	102	1002	85963	2011-09-04	2011-09-04	9	Managed as out patient	3	33	3	1	99	9	9	999	Y	0	0	0	0	0	0	0	0	0	0	0	0	0	0	0	0	1		2			2
1024	2019-03-04 16:35:17	rgebeyehu@clintonhealthaccess.org	2019-02-12	Remrim		CHAI		1	102	1002	53953	2011-09-04	2011-09-04	9	Managed as out patient	1	7	2	1	99	9	9	999	Y	0	0	0	0	0	0	0	0	0	0	0	0	0	0	0	0	1		2			2
1025	2019-03-04 16:38:29	rgebeyehu@clintonhealthaccess.org	2019-02-12	Remrim		CHAI		1	102	1002	30716	2011-10-04	2011-10-04	9	Managed as out patient	2	17	3	2	99	9	9	999	Y	0	0	0	0	0	0	0	0	0	0	0	0	0	0	0	0	1		2			2
1026	2019-03-04 16:41:38	rgebeyehu@clintonhealthaccess.org	2019-02-12	Remrim		CHAI		1	102	1002	85691	2011-10-04	2011-10-04	9	Managed as out patient	1	9	2	2	99	9	9	999	Y	0	0	0	0	0	0	0	0	0	0	0	0	0	0	0	0	1		2			2
1027	2019-03-04 16:44:46	rgebeyehu@clintonhealthaccess.org	2019-02-12	Remrim		CHAI		1	102	1002	9730	2011-11-04	2011-11-04	9	Managed as out patient	4	36	3	2	99	9	9	999	Y	0	0	0	0	0	0	0	0	0	0	0	0	0	0	0	0	1		2			2
1028	2019-03-04 16:47:45	rgebeyehu@clintonhealthaccess.org	2019-02-12	Remrim		CHAI		1	102	1002	857224	2011-11-04	2011-11-04	9	Managed as out patient	3	24	3	1	99	9	9	999	Y	0	0	0	0	0	0	0	0	0	0	0	0	0	0	0	0	1		2			2
1029	2019-03-04 16:50:44	rgebeyehu@clintonhealthaccess.org	2019-02-12	Remrim		CHAI		1	102	1002	84635	2011-11-04	2011-11-04	9	Managed as out patient	2	12	3	2	99	9	9	999	Y	0	0	0	0	0	0	0	0	0	0	0	0	0	0	0	0	1		2			2
1030	2019-03-04 16:53:38	rgebeyehu@clintonhealthaccess.org	2019-02-12	Remrim		CHAI		1	102	1002	54771	2011-12-04	2011-12-04	9	Managed as out patient	2	14	3	1	99	9	9	999	Y	0	0	0	0	0	0	0	0	0	0	0	0	0	0	0	0	1		2			2
1031	2019-03-04 16:56:43	rgebeyehu@clintonhealthaccess.org	2019-02-13	Remrim		CHAI		1	102	1002	82988	2011-12-04	2011-12-04	9	Managed as out patient	1	4	2	1	99	9	9	999	Y	0	0	0	0	0	0	0	0	0	0	0	0	0	0	0	0	1		2			2
1032	2019-03-04 17:02:20	rgebeyehu@clintonhealthaccess.org	2019-02-12	Remrim		CHAI		1	102	1002	55831	2011-12-04	2011-11-04	9	Managed as out patient	2	18	3	1	99	9	9	999	Y	0	0	0	0	0	0	0	0	0	0	0	0	0	0	0	0	1		2			2
1033	2019-03-04 17:07:11	rgebeyehu@clintonhealthaccess.org	2019-02-12	Remrim		CHAI		1	102	1002	42051	15/04/11	15/04/11	9	Managed as out patient	3	24	3	2	99	9	9	999	Y	0	0	0	0	0	0	0	0	0	0	0	0	0	0	0	0	1		2			2
1034	2019-03-04 17:10:06	rgebeyehu@clintonhealthaccess.org	2019-02-12	Remrim		CHAI		1	102	1002	63546	16/04/11	16/04/11	9	Managed as out patient	3	28	3	2	99	9	9	999	Y	0	0	0	0	0	0	0	0	0	0	0	0	0	0	0	0	1		2			2
1035	2019-03-04 17:13:09	rgebeyehu@clintonhealthaccess.org	2019-02-12	Remrim		CHAI		1	102	1002	83351	17/04/11	17/04/11	9	Managed as out patient	1	3	2	1	99	9	9	999	Y	0	0	0	0	0	0	0	0	0	0	0	0	0	0	0	0	1		2			2
1036	2019-03-12 15:19:32	rgebeyehu@clintonhealthaccess.org	2019-02-12	Remrim		CHAI		1	101	1001	101547	26/02/11	26/02/11	9	Managed as out patient	2	16	3	1	10.5	9		42	A Y	1	0	0	0	0	0	0	0	0	0	0	0	0	0	0	0	1		2			2
1037	2019-03-12 15:23:42	rgebeyehu@clintonhealthaccess.org	2019-03-12	Remrim		CHAI		1	101	1001	90110	22/02/11	22/02/11	9	Managed as out patient	3	29	3	2	99	9	37.8	43	A	1	0	0	0	0	0	0	0	0	0	0	0	0	0	0	0	0		2			2
1038	2019-03-12 15:26:49	rgebeyehu@clintonhealthaccess.org	2019-03-12	Remrim		CHAI		1	101	1001	131771	21/02/11	21/02/11	9	Managed as out patient	2	21	3	1	99	9	39.4	54	A G	1	0	0	0	0	0	1	0	0	0	0	0	0	0	0	0	0		2			2
1039	2019-03-12 15:30:20	rgebeyehu@clintonhealthaccess.org	2019-03-12	Remrim		CHAI		1	101	1001	111420	2011-02-04	2011-02-04	9	Managed as out patient	2	16	3	1	99	9	36	999	A D	1	0	0	1	0	0	0	0	0	0	0	0	0	0	0	0	0		2			2
1040	2019-03-12 15:34:32	rgebeyehu@clintonhealthaccess.org	2019-03-12	Remrim		CHAI		1	101	1001	129800	2011-02-04	2011-02-04	9	Managed as out patient	1	4	2	2	6	9	9	999	A D	1	0	0	1	0	0	0	0	0	0	0	0	0	0	0	0	0		2			2
1041	2019-03-12 15:41:35	rgebeyehu@clintonhealthaccess.org	2019-03-12	Remrim		CHAI		1	101	1001	133530	28/03/11	28/03/11	9	Managed as out patient	2	18	3	2	9	9	9	40	A K	1	0	0	0	0	0	0	0	0	0	1	0	0	0	0	0	0		2			2
1042	2019-03-12 15:45:19	rgebeyehu@clintonhealthaccess.org	2019-03-12	Remrim		CHAI		1	101	1001	107234	27/03/11	27/03/11	9	managed as out patient	2	18	3	1	10	9	37.1	46	A D	1	0	0	1	0	0	0	0	0	0	0	0	0	0	0	0	0		2			2
1043	2019-03-12 15:48:41	rgebeyehu@clintonhealthaccess.org	2019-03-12	Remrim		CHAI		1	101	1001	95832	25/03/11	25/03/11	9	managed as out patient	3	24	3	1	10	9	37.5	44	A B G	1	1	0	0	0	0	1	0	0	0	0	0	0	0	0	0	0		2			2
1044	2019-03-12 15:53:11	rgebeyehu@clintonhealthaccess.org	2019-03-12	Remrim		CHAI		1	101	1001	133124	20/03/11	20/03/11	9	Managed as out patient	2	12	3	1	8	9	38	38	A B G	1	1	0	0	0	0	1	0	0	0	0	0	0	0	0	0	0		2			2
1045	2019-03-12 15:56:25	rgebeyehu@clintonhealthaccess.org	2019-03-12	Remrim		CHAI		1	101	1001	103292	19/03/11	19/03/11	9	Managed as out patient	3	24	3	2	99	9	36.6	50	A B	1	1	0	0	0	0	0	0	0	0	0	0	0	0	0	0	0		2			2
1046	2019-03-12 16:00:50	rgebeyehu@clintonhealthaccess.org	2019-03-12	Remrim		CHAI		1	101	1001	114972	19/03/11	19/03/11	9	Managed as out patient	1	10	2	1	7	9	38.1	56	A B G	1	1	0	0	0	0	1	0	0	0	0	0	0	0	0	0	0		2			2
1047	2019-03-12 16:03:59	rgebeyehu@clintonhealthaccess.org	2019-03-12	Remrim		CHAI		1	101	1001	133014	17/03/11	17/03/11	9	Managed as out patient	4	36	3	1	11	9	9	46	A	1	0	0	0	0	0	0	0	0	0	0	0	0	0	0	0	0		2			2
1048	2019-03-12 16:09:13	rgebeyehu@clintonhealthaccess.org	2019-03-12	Remrim		CHAI		1	101	1001	103514	17/03/11	17/03/11	9	Managed as out patient	2	20	3	2	99	9	9	44	A B G	1	1	0	0	0	0	1	0	0	0	0	0	0	0	0	0	0		2			2
1049	2019-03-12 16:12:29	rgebeyehu@clintonhealthaccess.org	2019-03-12	Remrim		chai		1	101	1001	120910	17/03/11	17/03/11	9	Managed as out patient	1	7	2	2	99	9	9	60	A G	1	0	0	0	0	0	1	0	0	0	0	0	0	0	0	0	0		2			2
1050	2019-03-12 16:16:08	rgebeyehu@clintonhealthaccess.org	2019-03-12	Remrim		CHAI		1	101	1001	131970	2011-10-03	2011-10-03	9	Managed as out patient	2	12	3	1	6.8	9	9	60	A B K	1	1	0	0	0	0	0	0	0	0	1	0	0	0	0	0	0		2			2
1051	2019-03-12 16:19:54	rgebeyehu@clintonhealthaccess.org	2019-03-12	Remrim		CHAI		1	101	1001	126754	2011-10-03	2011-10-03	9	Managed as out patient	1	3	2	2	8	9	36.4	999	A B K	1	1	0	0	0	0	0	0	0	0	1	0	0	0	0	0	0		2			2
1052	2019-03-12 16:23:35	rgebeyehu@clintonhealthaccess.org	2019-03-12	Remrim		CHAI		1	101	1001	125017	2011-07-03	2011-07-03	9	managed as out patient	1	5	2	1	99	9	9	62	A B K	1	1	0	0	0	0	0	0	0	0	1	0	0	0	0	0	0		2			2
1053	2019-03-12 16:26:55	rgebeyehu@clintonhealthaccess.org	2019-03-12	Remrim		CHAI		1	101	1001	129158	2011-06-03	2011-06-03	9	Managed as out patient	1	4	2	1	8	9	37	999	A	1	0	0	0	0	0	0	0	0	0	0	0	0	0	0	0	0		2			2
1054	2019-03-12 16:30:21	rgebeyehu@clintonhealthaccess.org	2019-03-12	Remrim		CHIA		1	101	1001	128635	2011-06-03	2011-06-03	9	Managed as out patient	1	2	2	1	5.5	9	9	40	A K	1	0	0	0	0	0	0	0	0	0	1	0	0	0	0	0	0		2			2
1055	2019-03-12 16:34:54	rgebeyehu@clintonhealthaccess.org	2019-03-12	Remrim		CHAI		1	101	1001	108794	2011-05-03	2011-05-03	9	Managed as out patient	2	15	3	1	99	9	39.5	999	A B G	1	1	0	0	0	0	1	0	0	0	0	0	0	0	0	0	0		2			2
1056	2019-03-12 16:41:15	rgebeyehu@clintonhealthaccess.org	2019-03-12	Remrim		CHAI		1	101	1001	119031	2011-04-03	2011-04-03	9	Managed as out patient	1	8	2	2	99	9	38.2	61	A B	1	1	0	0	0	0	0	0	0	0	0	0	0	0	0	0	0		2			2
1057	2019-03-12 16:45:12	rgebeyehu@clintonhealthaccess.org	2019-03-12	Remrim		CHAI		1	101	1001	103660	2011-03-03	2011-03-03	9	managed as out patient	5	48	3	1	99	9	36.5	46	A B	1	1	0	0	0	0	0	0	0	0	0	0	0	0	0	0	0		2			2
1058	2019-03-12 16:48:20	rgebeyehu@clintonhealthaccess.org	2019-03-12	Remrim		CHAI		1	101	1001	126789	2011-03-03	2011-03-03	9	Managed as out patient	1	5	2	2	99	9	37.7	68	A B	1	1	0	0	0	0	0	0	0	0	0	0	0	0	0	0	0		2			2
1059	2019-03-12 16:51:33	rgebeyehu@clintonhealthaccess.org	2019-03-12	Remrim		CHAI		1	101	1001	113403	2011-03-03	2011-03-03	9	Managed as out patient	2	12	3	2	9	9	36	58	A B	1	1	0	0	0	0	0	0	0	0	0	0	0	0	0	0	0		2			2
1060	2019-03-12 16:54:49	rgebeyehu@clintonhealthaccess.org	2019-03-12	Remrim		CHAI		1	101	1001	132311	2011-03-03	2011-03-03	9	managed as out patient	4	36	3	1	14	9	36.5	56	A B	1	1	0	0	0	0	0	0	0	0	0	0	0	0	0	0	0		2			2
1061	2019-03-12 16:58:44	rgebeyehu@clintonhealthaccess.org	2019-03-12	Remrim		CHAI		1	101	1001	9	2011-03-03	2011-03-03	9	Managed as out patient	1	3	2	1	6	9	37	61	A	1	0	0	0	0	0	0	0	0	0	0	0	0	0	0	0	0		2			2
1062	2019-03-12 17:01:40	rgebeyehu@clintonhealthaccess.org	2019-03-12	Remrim		CHAI		1	101	1001	111632	27/03/11	27/03/11	9	Managed as out patient	2	14	3	2	11	9	37.2	54	A	1	0	0	0	0	0	0	0	0	0	0	0	0	0	0	0	0		2			2
1063	2019-03-12 17:05:12	rgebeyehu@clintonhealthaccess.org	2019-03-12	Remrim		CHAI		1	101	1001	128755	26/02/11	26/02/11	9	Managed as out patient	4	36	3	1	99	9	38	60	A G	1	0	0	0	0	0	1	0	0	0	0	0	0	0	0	0	0		2			2
1064	2019-03-12 17:08:30	rgebeyehu@clintonhealthaccess.org	2019-03-12	Remrim		CHAI		1	101	1001	114722	26/02/11	26/02/11	9	Managed as out patient	1	11	2	1	6	9	36.8	999	A	1	0	0	0	0	0	0	0	0	0	0	0	0	0	0	0	0		2			2
1065	2019-03-12 21:20:32	rgebeyehu@clintonhealthaccess.org	2019-03-12	Remrim		CHAI		1	101	1001	111606	24/01/11	24/01/11	9	Managed as out patient	1	1	1	1	2	9	37.8	53	A B	1	1	0	0	0	0	0	0	0	0	0	0	0	0	0	0	0		2			2
1066	2019-03-12 21:28:29	rgebeyehu@clintonhealthaccess.org	2019-03-12	Remrim		CHAI		1	101	1001	130272	23/01/11	23/01/11	9	managed as out patient	3	26	3	2	8.5	9	38.6	44	A	1	0	0	0	0	0	0	0	0	0	0	0	0	0	0	0	0		2			2
1067	2019-03-12 21:31:56	rgebeyehu@clintonhealthaccess.org	2019-03-12	Remrim		CHAI		1	101	1001	134533	17/04/11	17/04/11	9	Managed as out patient	3	34	3	1	12	9	38.9	57	A K	1	0	0	0	0	0	0	0	0	0	1	0	0	0	0	0	0		2			2
1068	2019-03-12 21:34:43	rgebeyehu@clintonhealthaccess.org	2019-03-12	Remrim		CHAI		1	101	1001	116685	2011-07-02	2011-07-02	9	Managed as out patient	4	38	3	1	99	9	36.6	999	A	1	0	0	0	0	0	0	0	0	0	0	0	0	0	0	0	0		2			2
1069	2019-03-12 21:37:44	rgebeyehu@clintonhealthaccess.org	2019-03-12	Remrim		CHAI		1	101	1001	105240	24/01/11	24/01/11	9	Managed as out patient	2	18	3	1	99	9	37	50	A B	1	1	0	0	0	0	0	0	0	0	0	0	0	0	0	0	0		2			2
1070	2019-03-12 21:41:12	rgebeyehu@clintonhealthaccess.org	2019-03-12	Remrim		CHAI		1	101	1001	113253	2011-08-02	2011-08-02	9	Managed as out patient	2	12	3	1	9	9	39	56	A G	1	0	0	0	0	0	1	0	0	0	0	0	0	0	0	0	0		2			2
1071	2019-03-12 21:55:29	rgebeyehu@clintonhealthaccess.org	2019-03-12	Remrim		CHAI		1	101	1001	122762	2011-04-04	2011-04-04	9	Managed as out patient	1	6	2	2	11	9	36	999	A	1	0	0	0	0	0	0	0	0	0	0	0	0	0	0	0	0		2			2
1072	2019-03-12 21:58:15	rgebeyehu@clintonhealthaccess.org	2019-03-12	Remrim		CHAI		1	101	1001	134008	2011-04-04	2011-04-04	9	Managed as out patient	2	12	3	2	8	9	9	46	A B K	1	1	0	0	0	0	0	0	0	0	1	0	0	0	0	0	0		2			2
1073	2019-03-12 22:01:11	rgebeyehu@clintonhealthaccess.org	2019-03-12	Remrim		CHAI		1	101	1001	118322	2011-10-03	2011-10-04	9	Managed as out patient	1	10	2	2	8	9	38	56	A G	1	0	0	0	0	0	1	0	0	0	0	0	0	0	0	0	0		2			2
1074	2019-03-12 22:04:03	rgebeyehu@clintonhealthaccess.org	2019-03-12	Remrim		CHAI		1	101	1001	114245	2011-12-04	2011-12-04	9	Managed as out patient	1	11	2	1	8	9	38.6	58	A B G	1	1	0	0	0	0	1	0	0	0	0	0	0	0	0	0	0		2			2
1075	2019-03-12 22:07:20	rgebeyehu@clintonhealthaccess.org	2019-03-12	Remrim		CHAI		1	101	1001	93580	24/01/11	24/01/11	9	Managed as out patient	3	28	3	2	99	9	9	50	A B	1	1	0	0	0	0	0	0	0	0	0	0	0	0	0	0	0		2			2
1076	2019-03-12 22:10:21	rgebeyehu@clintonhealthaccess.org	2019-03-12	Remrim		CHAI		1	101	1001	107036	25/01/11	25/01/11	9	Managed as out patient	2	17	3	1	7	9	36.6	999	A	1	0	0	0	0	0	0	0	0	0	0	0	0	0	0	0	0		2			2
1077	2019-03-12 22:13:24	rgebeyehu@clintonhealthaccess.org	2019-03-12	Remrim		CHAI		1	101	1001	99910	29/01/11	29/01/11	9	Managed as out patient	2	20	3	1	11	9	36.5	47	A B	1	1	0	0	0	0	0	0	0	0	0	0	0	0	0	0	0		2			2
1078	2019-03-12 22:19:49	rgebeyehu@clintonhealthaccess.org	2019-03-12	Remrim		CHAI		1	101	1001	116023	28/01/11	28/01/11	9	Managed as out patient	1	9	2	2	99	9	38	56	A B	1	1	0	0	0	0	0	0	0	0	0	0	0	0	0	0	0		2			2
1079	2019-03-12 22:22:52	rgebeyehu@clintonhealthaccess.org	2019-03-12	Remrim		CHAI		1	101	1001	109412	2011-02-02	2011-02-02	9	Managed as out patient	2	14	3	2	10	9	36.7	50	A B	1	1	0	0	0	0	0	0	0	0	0	0	0	0	0	0	0		2			2
1080	2019-03-12 22:25:38	rgebeyehu@clintonhealthaccess.org	2019-03-12	Remrim		CHAI		1	101	1001	87503	2011-02-02	2011-02-02	9	Managed as out patient	3	31	3	1	99	9	37.4	62	A B	1	1	0	0	0	0	0	0	0	0	0	0	0	0	0	0	0		2			2
1081	2019-03-12 22:28:59	rgebeyehu@clintonhealthaccess.org	2019-03-12	Remrim		CHAI		1	101	1001	126735	29/01/11	29/01/11	9	Managed as out patient	1	3	2	1	5.5	9	38.6	63	A Y	1	0	0	0	0	0	0	0	0	0	0	0	0	0	0	0	1		2			2
1082	2019-03-15 13:45:40	rgebeyehu@clintonhealthaccess.org	2019-03-12	Remrim		CHAI		1	101	1001	130899	2011-05-02	2011-05-02	9	Manged as out patient	1	10	2	2	99	9	38	65	A B G	1	1	0	0	0	0	1	0	0	0	0	0	0	0	0	0	0		2			2
1083	2019-03-15 13:49:22	rgebeyehu@clintonhealthaccess.org	2019-03-12	Remrim		CHAI		1	101	1001	124110	2011-05-02	2011-05-02	9	Managed as out patient	1	4	2	2	6	9	37.3	66	A B	1	1	0	0	0	0	0	0	0	0	0	0	0	0	0	0	0		2			2
1084	2019-03-15 13:52:15	rgebeyehu@clintonhealthaccess.org	2019-03-12	Remrim		CHAI		1	101	1001	93487	2011-02-02	2011-02-02	9	Managed as out patient	3	24	3	2	12	9	36.3	52	A B	1	1	0	0	0	0	0	0	0	0	0	0	0	0	0	0	0		2			2
1085	2019-03-15 13:55:00	rgebeyehu@clintonhealthaccess.org	2019-03-12	Remrim		CHAI		1	101	1001	101547	2011-06-02	2011-06-02	9	Managed as out patient	2	18	3	1	10	9	9	54	A	1	0	0	0	0	0	0	0	0	0	0	0	0	0	0	0	0		2			2
1086	2019-03-15 13:58:11	rgebeyehu@clintonhealthaccess.org	2019-03-12	Remrim		CHAI		1	101	1001	110928	2011-06-02	2011-06-02	9	Managed as out patient	2	13	3	2	7.5	9	37.2	54	A	1	0	0	0	0	0	0	0	0	0	0	0	0	0	0	0	0		2			2
1087	2019-03-15 14:01:48	rgebeyehu@clintonhealthaccess.org	2019-03-13	Remrim		CHAI		1	101	1001	100348	2011-06-02	2011-06-02	9	Managed as out patient	2	23	3	1	8.7	9	9	56	A B	1	1	0	0	0	0	0	0	0	0	0	0	0	0	0	0	0		2			2
1088	2019-03-15 19:36:53	rgebeyehu@clintonhealthaccess.org	2019-03-12	Remrim		CHAI		1	101	1001	115819	2011-06-02	2011-06-02	9	Managed as out patient	1	9	2	2	99	9	39.4	56	A	1	0	0	0	0	0	0	0	0	0	0	0	0	0	0	0	0		2			2
1089	2019-03-15 19:56:14	rgebeyehu@clintonhealthaccess.org	2019-03-12	Remrim		CHAI		1	101	1001	118322	2011-10-04	2011-10-04	9	Managed as out patient	1	10	2	2	8	9	38	56	A G	1	0	0	0	0	0	1	0	0	0	0	0	0	0	0	0	0		2			2
1090	2019-03-15 19:59:49	rgebeyehu@clintonhealthaccess.org	2019-03-12	Remrim		CHAI		1	101	1001	124342	2011-08-02	2011-08-02	9	Managed as out patient	1	4	2	1	99	9	36.6	60	A G	1	0	0	0	0	0	1	0	0	0	0	0	0	0	0	0	0		2			2
1091	2019-03-15 20:02:49	rgebeyehu@clintonhealthaccess.org	2019-03-12	Remrim		CHAI		1	101	1001	119041	2011-06-02	2011-06-02	9	Managed as out patient	1	8	2	2	99	9	9	43	A	1	0	0	0	0	0	0	0	0	0	0	0	0	0	0	0	0		2			2
1092	2019-03-15 20:11:22	rgebeyehu@clintonhealthaccess.org	2019-03-12	Remrim		CHAI		1	101	1001	121406	20/02/11	20/02/11	9	Managed as out patient	3	33	3	1	9	9	39	64	A G	1	0	0	0	0	0	1	0	0	0	0	0	0	0	0	0	0		2			2
1093	2019-03-15 20:14:39	rgebeyehu@clintonhealthaccess.org	2019-03-12	Remrim		CHAI		1	101	1001	109867	19/02/11	19/02/11	9	Managed as out patient	3	28	3	1	99	9	36.9	41	A B	1	1	0	0	0	0	0	0	0	0	0	0	0	0	0	0	0		2			2
1094	2019-03-15 21:32:38	rgebeyehu@clintonhealthaccess.org	2019-03-12	Remrim		CHAI		1	101	1001	59682	19/02/11	19/02/11	9	Manged as out patient	5	48	3	2	99	9	37.5	49	A B	1	1	0	0	0	0	0	0	0	0	0	0	0	0	0	0	0		2			2
1095	2019-03-15 21:37:44	rgebeyehu@clintonhealthaccess.org	2019-03-12	Remrim		CHAI		1	101	1001	125573	19/02/11	19/02/11	9	Managed as out patient	1	9	2	1	99	9	37.8	51	A B	1	1	0	0	0	0	0	0	0	0	0	0	0	0	0	0	0		2			2
1096	2019-03-15 21:41:44	rgebeyehu@clintonhealthaccess.org	2019-03-12	Remrim		CHAI		1	101	1001	121272	19/02/11	19/02/11	9	Managed as out patient	1	6	2	2	6.5	9	38	66	A B	1	1	0	0	0	0	0	0	0	0	0	0	0	0	0	0	0		2			2
1097	2019-03-15 21:44:53	rgebeyehu@clintonhealthaccess.org	2019-03-12	Remrim		CHAI		1	101	1001	117673	19/02/11	19/02/11	9	Managed as out patient	1	8	2	1	8.9	9	36.5	54	A B	1	1	0	0	0	0	0	0	0	0	0	0	0	0	0	0	0		2			2
1098	2019-03-15 21:47:42	rgebeyehu@clintonhealthaccess.org	2019-03-12	Remrim		CHAI		1	101	1001	115400	19/02/11	19/02/11	9	Managed as out patient	2	13	3	1	99	9	39.2	48	A B	1	1	0	0	0	0	0	0	0	0	0	0	0	0	0	0	0		2			2
1099	2019-03-15 21:50:39	rgebeyehu@clintonhealthaccess.org	2019-03-12	Remrim		CHAI		1	101	1001	126453	16/02/11	16/02/11	9	Managed as out patient	1	3	2	2	99	9	38	58	A B	1	1	0	0	0	0	0	0	0	0	0	0	0	0	0	0	0		2			2
1100	2019-03-15 21:53:39	rgebeyehu@clintonhealthaccess.org	2019-03-12	Remrim		CHAI		1	101	1001	121865	16/02/11	16/02/11	9	Managed as out patient	1	6	2	1	99	9	37.8	57	A	1	0	0	0	0	0	0	0	0	0	0	0	0	0	0	0	0		2			2
1101	2019-03-15 21:58:51	rgebeyehu@clintonhealthaccess.org	2019-03-12	Remrim		CHAI		1	101	1001	124494	16/02/11	16/02/11	9	managed as out patient	1	4	2	2	99	9	38	60	A B	1	1	0	0	0	0	0	0	0	0	0	0	0	0	0	0	0		2			2
1102	2019-03-15 22:02:36	rgebeyehu@clintonhealthaccess.org	2019-03-12	Remrim		CHAI		1	101	1001	173375	16/02/11	16/02/11	9	Managed as out patient	1	11	2	2	7.3	9	38.4	54	A B	1	1	0	0	0	0	0	0	0	0	0	0	0	0	0	0	0		2			2
1103	2019-03-15 22:05:48	rgebeyehu@clintonhealthaccess.org	2019-03-12	Remrim		CHAI		1	101	1001	116178	15/02/11	15/02/11	9	Managed as out patient	1	11	2	1	99	9	39.3	999	A B	1	1	0	0	0	0	0	0	0	0	0	0	0	0	0	0	0		2			2
1104	2019-03-15 22:10:25	rgebeyehu@clintonhealthaccess.org	2019-03-12	Remrim		CHAI		1	101	1001	116473	15/02/11	15/02/11	9	Managed as out patient	6	9	2	1	99	9	36.5	51	A B	1	1	0	0	0	0	0	0	0	0	0	0	0	0	0	0	0		2			2
1105	2019-03-15 22:14:22	rgebeyehu@clintonhealthaccess.org	2019-03-12	Remrim		CHAI		1	101	1001	96834	15/02/11	15/02/11	9	Managed as out patient	3	24	3	1	99	9	9	41	A B	1	1	0	0	0	0	0	0	0	0	0	0	0	0	0	0	0		2			2
1106	2019-03-15 22:17:22	rgebeyehu@clintonhealthaccess.org	2019-03-12	Remrim		CHAI		1	101	1001	100335	15/02/11	15/02/11	9	Managed as out patient	2	21	3	1	99	9	38.1	43	A B	1	1	0	0	0	0	0	0	0	0	0	0	0	0	0	0	0		2			2
1107	2019-03-15 22:20:19	rgebeyehu@clintonhealthaccess.org	2019-03-12	Remrim		CHAI		1	101	1001	98226	15/02/11	15/02/11	9	Managed as out patient	3	24	3	1	99	9	36.7	56	A B	1	1	0	0	0	0	0	0	0	0	0	0	0	0	0	0	0		2			2
1108	2019-03-15 22:26:30	rgebeyehu@clintonhealthaccess.org	2019-03-12	Remrim		CHAI		1	101	1001	103542	2011-11-02	2011-11-02	9	Managed as out patient	2	20	3	2	99	9	39.1	45	A B	1	1	0	0	0	0	0	0	0	0	0	0	0	0	0	0	0		2			2
1109	2019-03-16 07:29:05	rgebeyehu@clintonhealthaccess.org	2019-03-12	Remrim		CHAI		1	101	1001	124541	2011-11-02	2011-11-02	9	Managed as out patient	1	9	2	2	99	9	38.3	52	A B	1	1	0	0	0	0	0	0	0	0	0	0	0	0	0	0	0		2			2
1110	2019-03-16 07:32:05	rgebeyehu@clintonhealthaccess.org	2019-03-12	Remrim		CHAI		1	101	1001	106378	2011-11-02	2011-11-02	9	Managed as out patient	2	17	3	2	99	9	36.5	46	A B	1	1	0	0	0	0	0	0	0	0	0	0	0	0	0	0	0		2			2
1111	2019-03-16 07:34:54	rgebeyehu@clintonhealthaccess.org	2019-03-12	Remrim		CHAI		1	101	1001	114923	15/02/11	15/02/11	9	Managed as out patient	1	11	2	2	99	9	39.2	50	A B	1	1	0	0	0	0	0	0	0	0	0	0	0	0	0	0	0		2			2
1112	2019-03-16 07:37:41	rgebeyehu@clintonhealthaccess.org	2019-03-12	Remrim		CHAI		1	101	1001	94721	14/02/11	14/02/11	9	Managed as out patient	3	26	3	1	99	9	9	56	A B G	1	1	0	0	0	0	1	0	0	0	0	0	0	0	0	0	0		2			2
1113	2019-03-16 08:14:12	rgebeyehu@clintonhealthaccess.org	2019-03-12	Remrim		CHAI		1	101	1001	117737	14/02/11	14/02/11	9	Managed as out patient	1	8	2	2	7	9	36.6	57	A	1	0	0	0	0	0	0	0	0	0	0	0	0	0	0	0	0		2			2
1114	2019-03-16 08:17:04	rgebeyehu@clintonhealthaccess.org	2019-03-12	Remrim		CHAI		1	101	1001	131372	13/02/11	13/02/11	9	Managed as out patient	3	30	3	2	99	9	9	56	A B	1	1	0	0	0	0	0	0	0	0	0	0	0	0	0	0	0		2			2
1115	2019-03-16 08:19:59	rgebeyehu@clintonhealthaccess.org	2019-03-12	Remrim		CHAI		1	101	1001	82725	13/02/11	13/02/11	9	Managed as out patient	3	35	3	1	99	9	37.8	47	A K	1	0	0	0	0	0	0	0	0	0	1	0	0	0	0	0	0		2			2
1116	2019-03-16 08:24:18	rgebeyehu@clintonhealthaccess.org	2019-03-12	Remrim		CHAI		1	101	1001	103514	13/02/11	13/02/11	9	Managed as out patient	2	20	3	2	99	9	39.5	62	A B G	1	1	0	0	0	0	1	0	0	0	0	0	0	0	0	0	0		2			2
1117	2019-03-16 08:27:38	rgebeyehu@clintonhealthaccess.org	2019-03-12	Remrim		CHAI		1	101	1001	131295	2011-12-02	2011-12-02	9	Managed as out patient	5	48	3	2	99	9	38.8	45	A G	1	0	0	0	0	0	1	0	0	0	0	0	0	0	0	0	0		2			2
1118	2019-03-16 08:32:00	rgebeyehu@clintonhealthaccess.org	2019-03-12	Remrim		CHAI		1	101	1001	100109	2011-12-02	2011-12-02	9	Managed as out patient	3	24	3	1	10	9	36.8	54	A G	1	0	0	0	0	0	1	0	0	0	0	0	0	0	0	0	0		2			2
1119	2019-03-16 08:36:08	rgebeyehu@clintonhealthaccess.org	2019-03-12	Remrim		CHAI		1	101	1001	57772	2011-12-02	2011-12-02	9	Managed as out patient	5	48	3	1	12.5	9	36.5	52	A B	1	1	0	0	0	0	0	0	0	0	0	0	0	0	0	0	0		2			2
1120	2019-03-16 08:47:24	rgebeyehu@clintonhealthaccess.org	2019-03-12	Remrim		CHAI		1	101	1001	122062	2011-12-03	2011-12-03	9	Managed as out patient	1	6	2	2	99	9	9	999	A G	1	0	0	0	0	0	1	0	0	0	0	0	0	0	0	0	0		2			2
1121	2019-03-16 08:51:25	rgebeyehu@clintonhealthaccess.org	2019-03-12	Remrim		CHAI		1	101	1001	76869	2011-09-02	2011-09-02	9	Managed as out patient	4	47	3	1	99	9	36.5	40	A	1	0	0	0	0	0	0	0	0	0	0	0	0	0	0	0	0		2			2
1122	2019-03-16 08:55:16	rgebeyehu@clintonhealthaccess.org	2019-03-12	Remrim		CHAI		1	101	1001	106244	2011-09-02	2011-09-02	9	Managed as out patient	2	15	3	1	99	9	36.8	42	A N	1	0	0	0	0	0	0	0	0	0	0	0	0	1	0	0	0		2			2
1123	2019-03-16 08:59:45	rgebeyehu@clintonhealthaccess.org	2019-03-12	Remrim		CHAI		1	101	1001	106373	2011-08-02	2011-08-02	9	Managed as out patient	2	18	3	2	8.5	9	38.1	56	A G	1	0	0	0	0	0	1	0	0	0	0	0	0	0	0	0	0		2			2
[truncated: 10 more columns]
